# Supplementary material for: Interplay between acetylation and ubiquitination of imitation switch chromatin remodeler Isw1 confers multidrug resistance in Cryptococcus neoformans
Source: eLife journal article supplement (doi:10.7554/elife.85728), 2024-01-22
Supplement: fig1-data1 [file Figure 1-source data 1.xlsx]

## Sheet: Sheet1
	Figure 1b-source data 1b Analyses of resistance
FLC	H99			isw1Δ
0	1	1	1	1	1	1
4	0.645963	0.630952	0.656051	0.84127	0.721429	0.813433		FLC	H99			isw1Δ
8	0.453416	0.464286	0.43949	0.690476	0.628571	0.731343		8	1.00225	1.02628	0.97147	1.52626	1.38942	1.61659
16	0.310559	0.297619	0.292994	0.531746	0.492857	0.544776		16	1.03385	0.990774	0.975376	1.77018	1.64072	1.81356
32	0.26087	0.238095	0.267516	0.444444	0.457143	0.447761		32	1.02104	0.931903	1.04706	1.73955	1.78925	1.75253
64	0.229814	0.25	0.22293	0.31746	0.314286	0.335821		64	0.98107	1.06725	0.951684	1.35523	1.34168	1.43361
KTC	H99			isw1Δ
0	1	1	1	1	1	1
0.125	0.5058	0.548387	0.5	0.58481	0.596491	0.606581		KTC	H99			isw1Δ
0.25	0.419954	0.433692	0.47033	0.513456	0.516291	0.529328		0.25	0.951574	0.982704	1.06572	1.16344	1.16987	1.19941
0.5	0.432715	0.396655	0.425275	0.459494	0.457393	0.507868		0.5	1.03467	0.948448	1.01688	1.0987	1.09368	1.21437
1	0.383991	0.39546	0.393407	0.393671	0.452381	0.482117		1	0.982193	1.01153	1.00628	1.00695	1.15713	1.23319
2	0.102088	0.176822	0.164835	0.374684	0.377193	0.341917		2	0.690181	1.19543	1.11439	2.5331	2.55006	2.31158
5-FC	H99			isw1Δ
0	1	1	1	1	1	1
25	0.493697	0.44358	0.467347	0.661891	0.684058	0.660477		5-FC	H99			isw1Δ
50	0.315126	0.262646	0.267347	0.584527	0.571014	0.559682		50	1.11863	0.93234	0.949027	2.07495	2.02699	1.98676
100	0.220588	0.233463	0.155102	0.30659	0.307246	0.32626		100	1.08637	1.14977	0.763857	1.50992	1.51315	1.60679
200	0.109244	0.110895	0.0918367	0.186246	0.182609	0.177719		200	1.0505	1.06638	0.883115	1.79097	1.75599	1.70897
400	0.0987395	0.0856031	0.0857143	0.174785	0.185507	0.145889		400	1.09687	0.950945	0.95218	1.94165	2.06076	1.62064
5-FU	H99			isw1Δ
0	1	1	1	1	1	1
6.25	0.717504	0.74669	0.766258	0.744141	0.75121	0.782983
12.5	0.615251	0.656664	0.664467	0.666992	0.656341	0.700765
25	0.526863	0.548102	0.535344	0.604492	0.593417	0.652964
50	0.387348	0.386584	0.38737	0.5	0.505324	0.531549
100	0.332756	0.307149	0.333648	0.375977	0.395934	0.438815
Amp B	H99			isw1Δ
0	1	1	1	1	1	1
0.0625	0.428274	0.44684	0.561585	0.465501	0.449864	0.524107
0.125	0.011781	0.0327138	0.0206718	0.0137994	0.0135501	0.0285714
0.25	0.00554401	0.00892193	0.0155039	0.00919963	0.0180668	0.00982143
0.5	0.017325	0	0.0241171	0.00367985	0.0180668	0
1	0.00831601	0.0104089	0.00775194	0.00367985	0.00542005	0.0116071
