# Supplementary material for: Interplay between acetylation and ubiquitination of imitation switch chromatin remodeler Isw1 confers multidrug resistance in Cryptococcus neoformans
Source: eLife journal article supplement (doi:10.7554/elife.85728), 2024-01-22
Supplement: fig1-data1 [file Figure 1-source data 2.xlsx]

## Sheet: Sheet1
	Figure 1d-source data 1d H99+ FLC/isw1Δ+ FLC
		H99			isw1Δ
	FLC levels(μg/g)	37.95	38.92	39.25	5.31	5.25	5.01
