# Supplementary material for: Interplay between acetylation and ubiquitination of imitation switch chromatin remodeler Isw1 confers multidrug resistance in Cryptococcus neoformans
Source: eLife journal article supplement (doi:10.7554/elife.85728), 2024-01-22
Supplement: fig1-data1 [file Figure 1-source data 3.xlsx]

## Sheet: Sheet1
	Figure 1f-source data 1f Analyses of 5-FC resistance genes using qRT-PCR
	H99			H99+ 5-FC			isw1Δ			isw1Δ+ 5-FC
FCY1	0.930852	0.994582	1.07457	0.979274	0.76273	0.838046	1.14202	1.18982	1.30465	0.586233	0.602744	0.50751
FUR1	1.01202	0.911649	1.07634	0.690373	0.618115	0.607482	0.692082	0.816176	0.717968	0.599261	0.669441	0.614622
UGD1	0.995527	1.09129	0.91318	0.797954	0.749214	0.811907	0.75745	0.779743	0.804243	0.417988	0.4818	0.478565
UXS1	1.08091	1.08995	0.829148	0.59249	0.546565	0.558598	0.697822	0.81035	0.702016	0.31427	0.355184	0.331669
FCY2	0.956392	1.11482	0.928789	0.770811	0.682026	0.714033	0.880711	1.05146	0.928165	0.366142	0.348686	0.420799
