# Supplementary material for: Interplay between acetylation and ubiquitination of imitation switch chromatin remodeler Isw1 confers multidrug resistance in Cryptococcus neoformans
Source: eLife journal article supplement (doi:10.7554/elife.85728), 2024-01-22
Supplement: fig1-data1 [file Figure 1-source data 4.xlsx]

## Sheet: Sheet1
	Figure 1g-source data 1g Analyses of ChIP using qRT-PCR
	IgG			ChIP
ABC3(NR)	0.993921	1.16615	0.839933	0.981545	1.04645	0.9991
INO1	0.904021	1.09006	1.00592	4.39061	4.28936	4.00028
INO80	0.88904	0.959599	1.15136	3.7253	3.11147	3.65885
ABC6	0.893214	1.03615	1.07064	3.56121	3.24905	3.32716
UXS1	1.0045	0.882928	1.11257	3.15963	2.69901	2.81098
UGD1	1.00745	0.997275	0.995276	4.62523	4.34274	3.90851
FCY1	0.962769	0.989745	1.04749	2.26377	2.3247	2.24878
FCY2	0.948726	1.04374	1.00753	5.63208	7.03437	4.72097
