# Supplementary material for: Interplay between acetylation and ubiquitination of imitation switch chromatin remodeler Isw1 confers multidrug resistance in Cryptococcus neoformans
Source: eLife journal article supplement (doi:10.7554/elife.85728), 2024-01-22
Supplement: fig1-data1 [file Figure 1-source data 5.xlsx]

## Sheet: Sheet1
	Figure 1i-source data 1i Analyses of drug resistance genes using qRT-PCR
	H99+ 5-FC			DBD+ 5-FC			SNF+ 5-FC			Helicase-C+ 5-FC
UGD1	1.00676	1.01085	0.98239	0.628772	0.773905	0.595205	0.524852	0.531077	0.458525	0.386685	0.587519	0.476062
UXS1	0.930242	1.04075	1.029	0.56369	0.733666	0.687591	0.451533	0.360652	0.401258	0.393348	0.398363	0.360022
FCY2	1.02249	1.06951	0.908006	0.852007	0.881507	0.711346	0.649723	0.529964	0.493783	0.459354	0.685099	0.537839
	H99+ FLC			DBD+ FLC			SNF+ FLC			Helicase-C+ FLC
CNAG_03600	0.903698	0.994971	1.10133	2.13811	2.65842	2.12769	2.00622	1.63655	2.22346	2.4726	2.09208	1.64296
CNAG_06338	1.08093	0.914459	1.00461	1.2426	1.63045	1.3308	1.20765	1.2601	1.51732	0.960646	1.04258	1.21778
