# Supplementary material for: Interplay between acetylation and ubiquitination of imitation switch chromatin remodeler Isw1 confers multidrug resistance in Cryptococcus neoformans
Source: eLife journal article supplement (doi:10.7554/elife.85728), 2024-01-22
Supplement: fig2-data1 [file Figure 2-source data 1.xlsx]

## Sheet: Sheet1
	Figure 2e-source data 2e Analyses of resistance
	FLC	H99			ITC1Δ			CHD1Δ
	0	1	1	1	1	1	1	1	1	1				H99- 5-FC			ITC			CHD
	2	0.740826	0.711268	0.71831	0.848	0.848	0.882353	0.804878	0.832512	0.830986			4	1.04342	0.980195	0.976381	1.29331	1.3518	1.29344	0.927302	0.976456	0.922985
	4	0.642202	0.603286	0.600939	0.796	0.832	0.796078	0.570732	0.600985	0.568075			8	0.994042	0.99818	1.00778	1.30838	1.25114	1.26669	0.987271	0.991963	0.929075
	8	0.486239	0.488263	0.492958	0.64	0.612	0.619608	0.482927	0.485222	0.45446			16	1.02025	0.947625	1.03213	1.45019	1.46048	1.46209	0.948231	0.844843	0.806387
	16	0.396789	0.368545	0.401408	0.564	0.568	0.568627	0.36878	0.328571	0.313615			32	1.02651	1.01971	0.953785	2.12371	2.14126	2.15089	1.44049	1.4201	1.19481
	32	0.233945	0.232394	0.217371	0.484	0.488	0.490196	0.328293	0.323645	0.2723
	KTC	H99			ITC1Δ			CHD1Δ
	0	1	1	1	1	1	1	1	1	1				H99- 5-FC			ITC			CHD
	0.125	0.60262	0.585586	0.615764	0.714286	0.806452	0.731481	0.665094	0.726415	0.686916			0.25	0.961482	0.982943	1.05557	1.12336	1.39515	1.16497	1.00149	0.88094	0.946198
	0.25	0.489083	0.5	0.536946	0.571429	0.709677	0.592593	0.509434	0.448113	0.481308			0.5	0.984533	0.962682	1.05279	1.09906	1.17426	1.07641	1.01917	1.03025	0.99867
	0.5	0.419214	0.40991	0.448276	0.46798	0.5	0.458333	0.433962	0.438679	0.425234			1	0.970836	0.962431	1.06673	1.2943	1.30394	1.25651	0.939732	1.03507	0.903965
	1	0.336245	0.333333	0.369458	0.448276	0.451613	0.435185	0.325472	0.358491	0.313084			2	0.844295	1.00063	1.15508	1.66169	1.79145	1.71404	0.640339	0.426893	0.749692
	2	0.20524	0.243243	0.280788	0.403941	0.435484	0.416667	0.15566	0.103774	0.182243
	5-FC	H99			ITC1Δ			CHD1Δ
	0	1	1	1	1	1	1	1	1	1				H99- 5-FC			ITC			CHD
	25	0.727273	0.72	0.756881	0.858586	0.919014	0.863787	0.70303	0.70607	0.700326			50	0.985138	0.995624	1.01924	1.07927	1.17356	1.10123	0.998935	0.995003	1.08564
	50	0.540909	0.546667	0.559633	0.659933	0.644366	0.647841	0.548485	0.546326	0.596091			100	1.07994	0.982275	0.93778	1.24645	1.18677	1.18399	1.10506	1.12977	1.22385
	100	0.390909	0.355556	0.33945	0.451178	0.429577	0.428571	0.4	0.408946	0.442997			200	1.04376	0.920179	1.03607	1.12804	1.29897	1.15057	1.15213	1.14254	1.22618
	200	0.277273	0.244444	0.275229	0.299663	0.34507	0.305648	0.306061	0.303514	0.325733			400	1.00336	0.887632	1.109	2.33587	2.03566	1.74609	1.43338	1.24256	1.67772
	800	0.0954545	0.0844444	0.105505	0.222222	0.193662	0.166113	0.136364	0.118211	0.159609
