# Supplementary material for: Interplay between acetylation and ubiquitination of imitation switch chromatin remodeler Isw1 confers multidrug resistance in Cryptococcus neoformans
Source: eLife journal article supplement (doi:10.7554/elife.85728), 2024-01-22
Supplement: fig3-data1 [file Figure 3-source data 1.xlsx]

## Sheet: Sheet1
	Figure 3c-source 3c relative capsual size of isw1Δ
		H99	isw1Δ
	Relative capsual size	0.910364	1.27451
		0.910364	0.728291
		1.09244	1.09244
		0.910364	1.09244
		1.09244	1.09244
		1.09244	1.09244
		0.910364	0.910364
		0.910364	0.910364
		0.910364	0.910364
		0.910364	1.09244
