# Supplementary material for: Interplay between acetylation and ubiquitination of imitation switch chromatin remodeler Isw1 confers multidrug resistance in Cryptococcus neoformans
Source: eLife journal article supplement (doi:10.7554/elife.85728), 2024-01-22
Supplement: fig3-data1 [file Figure 3-source data 2.xlsx]

## Sheet: Sheet1
Figure 3d-source data 3d Animal survival analysis
days	H99	isw1Δ	Isw1Δ/ISW1
12	1
14	1		1
14	1		1
14			1
15			1
15			1
15			1
16		1	1
16		1
17	1	1	1
17	1	1	1
17	1	1	1
17		1
17		1
17		1
17		1
17		1
17		1
18	1		1
18	1
18	1
18	1
18	1
