# Supplementary material for: Interplay between acetylation and ubiquitination of imitation switch chromatin remodeler Isw1 confers multidrug resistance in Cryptococcus neoformans
Source: eLife journal article supplement (doi:10.7554/elife.85728), 2024-01-22
Supplement: fig3-data1 [file Figure 3-source data 3.xlsx]

## Sheet: Sheet1
	Figure 3c-source data 3c Lung CFU
	H99										isw1Δ
PBS	5.24389	5.2496	5.24273	5.44833	5.4591	5.32721	5.48436	5.37343	5.6432	5.07353	5.31104	5.39935	5.62486	5.37207	5.5027	5.37766	5.70436	5.50614	5.30814	5.3245
5 FLC	5.20121	4.91558	5.0511	5.15689	5.25091	5.37634	5.1199	5.34499	5.28555	4.89661	5.22573	5.15367	5.62141	5.25578	5.29034	5.08991	5.44569	5.2141	5.50452	5.50019
45 FLC	4.99864	4.10516	4.96941	4.63041	4.75044	5.11062	5.1601	4.72847	4.76065	3.36351	5.33411	4.98815	5.06855	4.99592	4.9354	4.89401	4.94173	5.13596	5.15437	4.91305
100 5FC	4.70774	5.03937	5.1318	5.02706	5.11881	4.98868	5.29431	5.20239	5.28642	5.49706	5.5271	5.63451	5.29648	5.32422	5.31366	5.46631	5.54212	5.3875	5.39395	5.52346
200 5FC	4.75498	4.72539	4.62258	4.9071	4.90916	4.88699	5.29773	5.19296	5.00539	4.59671	5.47245	5.69801	5.39276	5.48773	5.39169	5.52371	5.56506	5.41154	5.50744	5.52537
