# Supplementary material for: Interplay between acetylation and ubiquitination of imitation switch chromatin remodeler Isw1 confers multidrug resistance in Cryptococcus neoformans
Source: eLife journal article supplement (doi:10.7554/elife.85728), 2024-01-22
Supplement: fig3-figsupp1-data1 [file Figure 3-figure supplement 1 source data 1.xlsx]

## Sheet: Sheet1
		Figure 3-figure supplement 1 source data ISW1-FLAG/Histone 3
	30 ℃	1.05687	0.941587	1.00154
	37 ℃	0.964144	0.993577	1.15169
	NaCl	0.768769	1.11587	1.04057
	SDS	0.888343	1.15461	0.95517
	Congored	0.950457	1.17677	0.73775
