# Supplementary material for: Interplay between acetylation and ubiquitination of imitation switch chromatin remodeler Isw1 confers multidrug resistance in Cryptococcus neoformans
Source: eLife journal article supplement (doi:10.7554/elife.85728), 2024-01-22
Supplement: fig4-data1 [file Figure 4-source data 1.xlsx]

## Sheet: Sheet1
	Figure 4a-source data 4a isw1-flag/histone
Isw1Δ/ISW1	No FLC	0.992019	1.09811	0.909871
	10	0.59548	0.743594	0.702438
	20	0.745569	0.844657	0.794708
	40	0.228506	0.229439	0.220055
