# Supplementary material for: Interplay between acetylation and ubiquitination of imitation switch chromatin remodeler Isw1 confers multidrug resistance in Cryptococcus neoformans
Source: eLife journal article supplement (doi:10.7554/elife.85728), 2024-01-22
Supplement: fig4-data1 [file Figure 4-source data 2.xlsx]

## Sheet: Sheet1
	Figure 4b-source data 4b isw1-flag/histone
	time(mins)
Isw1Δ/ISW1	No FLC	1.05511	0.982779	0.962111
	5	0.977736	0.912489	0.898353
	15	0.982779	0.962111	0.977736
	30	0.543997	0.548811	0.554634
