# Supplementary material for: Interplay between acetylation and ubiquitination of imitation switch chromatin remodeler Isw1 confers multidrug resistance in Cryptococcus neoformans
Source: eLife journal article supplement (doi:10.7554/elife.85728), 2024-01-22
Supplement: fig4-data1 [file Figure 4-source data 3.xlsx]

## Sheet: Sheet1
	Figure 4c-source data 4c isw1-flag/histone
Isw1Δ/ISW1	No 5-FC	1.08051	1.03149	0.887997
	100	0.73553	0.61146	0.53739
	200	0.604546	0.48704	0.420543
	400	0.148075	0.097781	0.086855
