# Supplementary material for: Interplay between acetylation and ubiquitination of imitation switch chromatin remodeler Isw1 confers multidrug resistance in Cryptococcus neoformans
Source: eLife journal article supplement (doi:10.7554/elife.85728), 2024-01-22
Supplement: fig4-data1 [file Figure 4-source data 4.xlsx]

## Sheet: Sheet1
		Figure 4d-source data 4d isw1-flag/histone
		time(mins)
	Isw1Δ/ISW1	No 5-FC	1.01629	1.01916	1.33842
		5	0.75719	0.754734	0.713328
		15	0.743487	0.722312	0.707064
		30	0.417391	0.380321	0.3985
