# Supplementary material for: Interplay between acetylation and ubiquitination of imitation switch chromatin remodeler Isw1 confers multidrug resistance in Cryptococcus neoformans
Source: eLife journal article supplement (doi:10.7554/elife.85728), 2024-01-22
Supplement: fig5-data1 [file Figure 5-source data 1.xlsx]

## Sheet: Sheet1
	Figure 3e-source data figure 3e isw1-flag/histone
	WT	1.00644	1.06818	0.925387
	Q	1.01375	0.907772	0.975927
	R	0.387412	0.396484	0.401931
