# Supplementary material for: Interplay between acetylation and ubiquitination of imitation switch chromatin remodeler Isw1 confers multidrug resistance in Cryptococcus neoformans
Source: eLife journal article supplement (doi:10.7554/elife.85728), 2024-01-22
Supplement: fig5-data1 [file Figure 5-source data 2.xlsx]

## Sheet: Sheet1
	Figure 3f-source data figure 3f isw1-flag/histone
	WT	0.931525	1.00429	1.06418
	K89R	1.13611	1.23188	1.01114
	K97R	0.472323	0.558816	0.415141
	K113R	1.08318	0.843642	0.780061
