# Supplementary material for: Interplay between acetylation and ubiquitination of imitation switch chromatin remodeler Isw1 confers multidrug resistance in Cryptococcus neoformans
Source: eLife journal article supplement (doi:10.7554/elife.85728), 2024-01-22
Supplement: fig5-data1 [file Figure 5-source data 3.xlsx]

## Sheet: Sheet1
	Figure 3g-source data figure 3g isw1-flag/histone
	time(mins)
Isw1Δ/ISW1	-	0.983655	0.945861	1.07048
	0	0.685118	0.755643	0.827563
	30	0.798637	0.674474	0.826249
	60	0.771293	0.64208	0.607817
