# Supplementary material for: Interplay between acetylation and ubiquitination of imitation switch chromatin remodeler Isw1 confers multidrug resistance in Cryptococcus neoformans
Source: eLife journal article supplement (doi:10.7554/elife.85728), 2024-01-22
Supplement: fig5-data1 [file Figure 5-source data 4.xlsx]

## Sheet: Sheet1
	Figure 3h-source data figure 3h isw1-flag/actin
	time(mins)
K97Q	-	1.08616	0.92484	0.989
	0	1.02824	1.02365	0.884057
	30	1.02495	0.937858	0.818648
	60	0.91902	1.1592	0.965127
