# Supplementary material for: Interplay between acetylation and ubiquitination of imitation switch chromatin remodeler Isw1 confers multidrug resistance in Cryptococcus neoformans
Source: eLife journal article supplement (doi:10.7554/elife.85728), 2024-01-22
Supplement: fig5-data1 [file Figure 5-source data 5.xlsx]

## Sheet: Sheet1
	Figure 3i-source data figure 3i isw1-flag/histone
	time(mins)
K97R	-	0.858081	1.03739	1.10453
	0	0.807065	0.879461	1.06277
	30	0.640167	0.696963	0.905565
	60	0.228049	0.277293	0.327165
