# Supplementary material for: Interplay between acetylation and ubiquitination of imitation switch chromatin remodeler Isw1 confers multidrug resistance in Cryptococcus neoformans
Source: eLife journal article supplement (doi:10.7554/elife.85728), 2024-01-22
Supplement: fig5-data1 [file Figure 5-source data 6.xlsx]

## Sheet: Sheet1
	Figure 3j-source data figure 3j Comparisons of assay results to determine Isw1 stability
time(mins)
	WT			Q			R
-	100	100	100	100	100	100	100	100	100
0	69.6502	79.8894	77.3074	94.6672	88.3067	89.389	94.0546	84.7761	96.2197
30	81.1908	71.3079	77.1847	94.3643	80.9058	82.7753	74.6045	67.1841	81.9868
60	78.4109	67.8831	56.7797	84.6118	79.7827	97.5862	26.5766	26.7298	29.6204
