# Supplementary material for: Interplay between acetylation and ubiquitination of imitation switch chromatin remodeler Isw1 confers multidrug resistance in Cryptococcus neoformans
Source: eLife journal article supplement (doi:10.7554/elife.85728), 2024-01-22
Supplement: fig5-data1 [file Figure 5-source data 7.xlsx]

## Sheet: Sheet1
	Figure 3k-source data figure 3k drug resistance genes qPCR
	ISW1 K97Q			ISW1 K97Q-FLC			ISW1 K97R			ISW1 K97R-FLC
CNAG_03600	1.08858	0.730558	1.18086	1.36845	1.1987	1.07849	1.30456	1.45	1.4191	3.02008	3.65796	3.79552
CNAG_02430	1.04042	0.800591	1.15899	0.918817	0.90377	1.04506	0.593136	0.9318	0.721948	2.97102	2.59182	2.63408
CNAG_06338	1.03253	0.834671	1.1328	1.03603	0.958471	1.13914	0.717014	0.976117	0.799685	2.90508	2.96451	2.42151
	ISW1 K97Q			ISW1 K97Q- 5-FC			ISW1 K97R			ISW1 K97R- 5-FC
FCY1	1.00162	0.963595	1.03478	0.491199	0.463628	0.669301	0.488966	0.540837	0.588892	0.242073	0.274544	0.273249
FUR1	1.01622	0.968435	1.01534	0.405887	0.383703	0.553901	0.562986	0.450185	0.476844	0.41042	0.444244	0.376831
UGD1	0.929051	0.997604	1.07335	0.53562	0.549387	0.646015	0.450425	0.41022	0.585944	0.352908	0.290719	0.322774
UXS1	0.848741	1.19979	0.951471	0.421049	0.471113	0.485311	0.547542	0.4764	0.678342	0.359314	0.375035	0.313822
FCY2	0.929626	1.02676	1.04361	0.608777	0.651887	0.636658	0.36335	0.59501	0.580362	0.288866	0.350983	0.353114
