# Supplementary material for: Interplay between acetylation and ubiquitination of imitation switch chromatin remodeler Isw1 confers multidrug resistance in Cryptococcus neoformans
Source: eLife journal article supplement (doi:10.7554/elife.85728), 2024-01-22
Supplement: fig5-figsupp1-data1 [file Figure 5-figure supplement 1-source data 1.xlsx]

## Sheet: Sheet1
Figure 5-figure supplement 1a-source data Figure 5-figure supplement 1a isw1/actin
H99	1.04954	0.946536	1.00392
Q	0.957915	1.22573	1.07492
R	1.13523	0.907997	1.12173
H99	0.827936	1.13964	1.03243
K89R	0.925484	0.979593	1.08894
K97R	0.850247	1.00893	1.20074
K113R	1.05487	0.845258	0.98093
H99	0.915231	0.979584	1.10519
K89Q	1.00374	0.996629	0.829565
K97Q	0.930237	0.958099	0.813734
K113Q	0.865687	0.844117	1.14627
H99	1.01762	1.02895	0.953425
K89R,K97R	0.919391	0.96914	0.816232
K89R,K113R	1.10903	0.923168	1.16042
K97R,K113R	0.930816	1.1973	0.952051
