# Supplementary material for: Interplay between acetylation and ubiquitination of imitation switch chromatin remodeler Isw1 confers multidrug resistance in Cryptococcus neoformans
Source: eLife journal article supplement (doi:10.7554/elife.85728), 2024-01-22
Supplement: fig5-figsupp1-data1 [file Figure 5-figure supplement 1-source data 2.xlsx]

## Sheet: Sheet1
	Figure 5-figure supplement 1b-source data Figure 5-figure supplement 1b isw1/actin
H99	0.876416	1.09626	1.02733
Q	0.917359	1.03868	0.856927
R	0.874509	1.11146	1.04781
H99	0.83161	1.05743	1.11096
K89R	1.1548	0.988721	0.899012
K97R	0.866188	0.826415	1.06926
K113R	0.956624	0.786296	1.00564
H99	0.990679	1.03673	0.972594
K89Q	1.12609	0.919551	0.928355
K97Q	1.05587	0.897487	1.00868
K113Q	0.834777	1.05878	0.948875
H99	0.961365	1.06821	0.970423
K89R,K97R	0.937646	0.852257	0.898751
K89R,K113R	0.975975	1.00159	0.932361
K97R,K113R	0.951039	0.939064	0.898305
