# Supplementary material for: Interplay between acetylation and ubiquitination of imitation switch chromatin remodeler Isw1 confers multidrug resistance in Cryptococcus neoformans
Source: eLife journal article supplement (doi:10.7554/elife.85728), 2024-01-22
Supplement: fig6-data1 [file Figure 6-source data 1.xlsx]

## Sheet: Sheet1
Figure 6a-source data 6a isw1-flag/histone
K97R	0.195477	0.251746	0.194841
K97Q	0.919101	1.02965	0.746472
WT	0.982398	0.988342	1.02926
WT+MG132	1.66818	1.80868	1.62686
WT+RAPA	1.10235	1.24047	1.10915
