# Supplementary material for: Interplay between acetylation and ubiquitination of imitation switch chromatin remodeler Isw1 confers multidrug resistance in Cryptococcus neoformans
Source: eLife journal article supplement (doi:10.7554/elife.85728), 2024-01-22
Supplement: fig6-data1 [file Figure 6-source data 2.xlsx]

## Sheet: Sheet1
Figure 6b-source data figure 6b isw1-flag/histone
K97R	0.085507	0.174128	0.1589
K97Q	0.902005	1.12224	0.839203
WT	0.885148	1.1083	1.00655
WT+MG132	2.21211	2.71192	2.26908
WT+MG132+FLC	1.91078	2.43476	2.02109
