# Supplementary material for: Interplay between acetylation and ubiquitination of imitation switch chromatin remodeler Isw1 confers multidrug resistance in Cryptococcus neoformans
Source: eLife journal article supplement (doi:10.7554/elife.85728), 2024-01-22
Supplement: fig6-data1 [file Figure 6-source data 3.xlsx]

## Sheet: Sheet1
Figure 6c-source data figure 6c isw1-flag/histone
K97R	0.145752	0.152297	0.196401
K97Q	1.03759	0.766266	0.595035
WT	0.989774	1.15558	0.854646
WT+MG132	2.05124	1.71201	2.26605
WT+MG132+5-FC	1.20756	1.1476	1.41628
