# Supplementary material for: Interplay between acetylation and ubiquitination of imitation switch chromatin remodeler Isw1 confers multidrug resistance in Cryptococcus neoformans
Source: eLife journal article supplement (doi:10.7554/elife.85728), 2024-01-22
Supplement: fig6-data1 [file Figure 6-source data 4.xlsx]

## Sheet: Sheet1
Figure 6d-source data 6d isw1-flag/histone
K97Q	0.877567	1.1067	1.01573
K97Q+MG132	1.22423	1.33402	1.15401
K97R	0.308776	0.348648	0.212041
K97R+MG132	0.555067	0.650498	0.679243
