# Supplementary material for: Interplay between acetylation and ubiquitination of imitation switch chromatin remodeler Isw1 confers multidrug resistance in Cryptococcus neoformans
Source: eLife journal article supplement (doi:10.7554/elife.85728), 2024-01-22
Supplement: fig6-data1 [file Figure 6-source data 5.xlsx]

## Sheet: Sheet1
Figure 6g-source data figure 6g isw1-flag/histone
K97Q	0.850113	0.959656	0.805942
WT	0.947112	1.1598	0.893088
K97R	0.12972	0.15556	0.11496
K97R, K113R	0.671533	0.917595	0.670256
K97R, K147R	0.215928	0.402809	0.2268
K97R, K183R	0.333477	0.307822	0.254355
K97R, K347R	0.31056	0.382288	0.261993
K97R, K415R	0.306239	0.440367	0.320329
K97R, K441R	1.94467	1.69928	2.16022
