# Supplementary material for: Interplay between acetylation and ubiquitination of imitation switch chromatin remodeler Isw1 confers multidrug resistance in Cryptococcus neoformans
Source: eLife journal article supplement (doi:10.7554/elife.85728), 2024-01-22
Supplement: fig7-data1 [file Figure 7-source data 1.xlsx]

## Sheet: Sheet1
Figure 7b-source data figure 7b isw1-flag/histone
K97R	1.09339	0.980627	0.925981
K97R, cdc4Δ	1.88973	1.66486	1.99271
