# Supplementary material for: Interplay between acetylation and ubiquitination of imitation switch chromatin remodeler Isw1 confers multidrug resistance in Cryptococcus neoformans
Source: eLife journal article supplement (doi:10.7554/elife.85728), 2024-01-22
Supplement: fig7-data1 [file Figure 7-source data 2.xlsx]

## Sheet: Sheet1
Figure 7c-source data figure 7c isw1-flag/histone
K97R	1.03514	0.872204	1.09265
K97R, fwd1Δ	1.17891	1.21725	1.13099
