# Supplementary material for: Interplay between acetylation and ubiquitination of imitation switch chromatin remodeler Isw1 confers multidrug resistance in Cryptococcus neoformans
Source: eLife journal article supplement (doi:10.7554/elife.85728), 2024-01-22
Supplement: fig8-data1 [file Figure 8-source data 1.xlsx]

## Sheet: Sheet1
Figure 8c-source data figure 8c isw1-flag/histone
	CDLC61			CDLC61+MG132
ISW-Flag	0.947329	1.11882	0.933855	1.63384	2.23909	2.7516
	CDLC62			CDLC62+MG132
ISW-Flag	1.07687	1.007	0.916131	1.51922	1.28223	1.33488
	CDLC120			CDLC120+MG132
ISW-Flag	1.15399	0.955669	0.890343	1.94944	1.53952	1.45767
