# Supplementary material for: Interplay between acetylation and ubiquitination of imitation switch chromatin remodeler Isw1 confers multidrug resistance in Cryptococcus neoformans
Source: eLife journal article supplement (doi:10.7554/elife.85728), 2024-01-22
Supplement: fig8-data1 [file Figure 8-source data 2.xlsx]

## Sheet: Sheet1
	Figure 8e-source data 8e Analyses of the resistance between H99 and H99 OE
	FLC	H99			H99 OE
	0	1	1	1	1	1	1
	2	0.723757	0.739645	0.727273	0.664596	0.689024	0.743902			H99			H99 OE
	4	0.60221	0.64497	0.630303	0.565217	0.554878	0.585366		4	0.962261	1.03059	1.00715	0.903152	0.886631	0.935347
	8	0.535912	0.52071	0.521212	0.409938	0.426829	0.439024		8	1.01895	0.990047	0.991002	0.779432	0.811548	0.834735
	16	0.342541	0.319527	0.321212	0.254658	0.268293	0.262195		16	1.0451	0.97488	0.980022	0.776966	0.818564	0.799961
	32	0.237569	0.242604	0.236364	0.149068	0.128049	0.134146		32	0.994656	1.01573	0.989609	0.624121	0.536116	0.561645
	KTC	H99			H99 OE
	0	1	1	1	1	1	1
	0.125	0.459893	0.489933	0.466258	0.426752	0.386905	0.453947			H99			H99 OE
	0.25	0.315508	0.355705	0.343558	0.261146	0.267857	0.328947		0.25	0.932746	1.05158	1.01567	0.772036	0.791875	0.972478
	0.5	0.272727	0.288591	0.257669	0.203822	0.220238	0.282895		0.5	0.999017	1.05713	0.943857	0.746612	0.806746	1.03626
	1	0.224599	0.255034	0.257669	0.178344	0.178571	0.177632		1	0.913869	1.0377	1.04843	0.725663	0.726588	0.722764
	2	0.224599	0.268456	0.251534	0.152866	0.136905	0.138158		2	0.904924	1.08163	1.01345	0.615909	0.551599	0.556648
	5FC	H99			H99 OE
	0	1	1	1	1	1	1
	12.5	0.825843	0.830409	0.802469	0.797546	0.843373	0.814371			H99			H99 OE
	25	0.769663	0.748538	0.814815	0.638037	0.680723	0.682635		25	0.989701	0.962537	1.04776	0.820445	0.875334	0.877793
	50	0.550562	0.532164	0.54321	0.460123	0.481928	0.473054		50	1.01584	0.981891	1.00227	0.848969	0.889201	0.872828
	100	0.483146	0.48538	0.506173	0.404908	0.39759	0.383234		100	0.982871	0.987415	1.02971	0.82371	0.808823	0.779617
	200	0.297753	0.321637	0.314815	0.257669	0.26506	0.239521		200	0.95617	1.03287	1.01096	0.827448	0.851184	0.76917
