# Supplementary material for: Interplay between acetylation and ubiquitination of imitation switch chromatin remodeler Isw1 confers multidrug resistance in Cryptococcus neoformans
Source: eLife journal article supplement (doi:10.7554/elife.85728), 2024-01-22
Supplement: fig8-data1 [file Figure 8-source data 3.xlsx]

## Sheet: Sheet1
	Figure 8f-source data 8f Analyses of the resistance between cdlc61 and cdlc61 OE
	FLC	CDLC61			CDLC61 OE
	0	1	1	1	1	1	1
	1	0.927126	0.850394	0.853755	0.78972	0.857798	0.967914			61			OE
	2	0.797571	0.783465	0.731225	0.719626	0.683486	0.791444		2	1.03479	1.01649	0.948715	0.933666	0.886777	1.02684
	4	0.587045	0.543307	0.561265	0.429907	0.394495	0.395722		4	1.0411	0.963529	0.995376	0.762418	0.699619	0.701794
	8	0.315789	0.34252	0.328063	0.247664	0.293578	0.320856		8	0.960457	1.04176	0.997787	0.753256	0.892902	0.975866
	16	0.283401	0.240157	0.316206	0.140187	0.16055	0.144385		16	1.01243	0.857947	1.12962	0.500808	0.573556	0.515806
	KTC	CDLC61			CDLC61 OE
	0	1	1	1	1	1	1
	0.0625	0.787356	0.795322	0.827381	0.68595	0.707317	0.698529			CDLC61			CDLC61 OE
	0.125	0.672414	0.690058	0.720238	0.578512	0.601626	0.595588		0.125	0.968565	0.993981	1.03745	0.833307	0.866601	0.857904
	0.25	0.517241	0.497076	0.494048	0.429752	0.439024	0.426471		0.25	1.02875	0.988639	0.982616	0.854738	0.873179	0.848211
	0.5	0.367816	0.345029	0.39881	0.31405	0.357724	0.323529		0.5	0.992618	0.931123	1.07626	0.847519	0.965381	0.873102
	1	0.316092	0.327485	0.333333	0.31405	0.292683	0.301471		1	0.970688	1.00568	1.02364	0.964416	0.898802	0.925788
	5FC	CDLC61			CDLC61 OE
	0	1	1	1	1	1	1
	25	0.734317	0.743682	0.756654	0.695	0.655172	0.673171			CDLC61			CDLC61 OE
	50	0.653137	0.620939	0.676806	0.645	0.630542	0.668293		50	1.00437	0.954859	1.04077	0.991859	0.969626	1.02768
	100	0.505535	0.483755	0.486692	0.39	0.384236	0.390244		100	1.02752	0.983253	0.989224	0.792693	0.780978	0.793189
	200	0.391144	0.407942	0.425856	0.27	0.270936	0.287805		200	0.957949	0.99909	1.04296	0.661256	0.663548	0.704862
	400	0.239852	0.238267	0.209125	0.15	0.142857	0.15122		400	1.04702	1.0401	0.912886	0.654788	0.623608	0.660112
