# Supplementary material for: Interplay between acetylation and ubiquitination of imitation switch chromatin remodeler Isw1 confers multidrug resistance in Cryptococcus neoformans
Source: eLife journal article supplement (doi:10.7554/elife.85728), 2024-01-22
Supplement: fig8-data1 [file Figure 8-source data 4.xlsx]

## Sheet: Sheet1
	Figure 8g-source data 8g Analyses of the resistance between CDLC135 and CDLC135 OE
	FLC	CDLC135			CDLC135 OE
	0	1	1	1	1	1	1
	1	0.802439	0.776699	0.796569	0.516129	0.481366	0.508197				CDLC135			CDLC135 OE
	2	0.643902	0.660194	0.656863	0.383871	0.378882	0.377049			2	0.985083	1.01001	1.00491	0.58727	0.579638	0.576834
	4	0.512195	0.487864	0.52451	0.287097	0.276398	0.321311			4	1.00788	0.960004	1.03211	0.56494	0.543887	0.632267
	8	0.253659	0.242718	0.267157	0.196774	0.177019	0.213115			8	0.996649	0.953665	1.04969	0.773145	0.695524	0.837349
	16	0.241463	0.228155	0.232843	0.154839	0.111801	0.163934			16	1.03122	0.974382	0.994402	0.661269	0.477469	0.700114
	KTC	CDLC135			CDLC135 OE
	0	1	1	1	1	1	1
	0.03125	0.631829	0.63285	0.619617	0.396774	0.389439	0.365625				CDLC135			CDLC135 OE
	0.0625	0.501188	0.509662	0.504785	0.319355	0.287129	0.3			0.0625	0.992036	1.00881	0.999155	0.632121	0.568334	0.593811
	0.125	0.285036	0.301932	0.339713	0.222581	0.250825	0.25			0.125	0.922763	0.977464	1.09977	0.720574	0.812011	0.80934
	0.25	0.228029	0.219807	0.210526	0.151613	0.151815	0.171875			0.25	1.03907	1.00161	0.959319	0.690865	0.691786	0.783194
	0.5	0.16152	0.152174	0.133971	0.109677	0.125413	0.109375			0.5	1.08242	1.01978	0.8978	0.734996	0.840444	0.732969
	5-FC	CDLC135			CDLC135 OE
	0	1	1	1	1	1	1
	6.25	0.77551	0.810875	0.779343	0.952229	0.923841	1.02365				CDLC135			CDLC135 OE
	12.5	0.680272	0.699764	0.730047	0.745223	0.807947	0.820946			12.5	0.967174	0.994886	1.03794	1.05952	1.14869	1.16718
	25	0.496599	0.477541	0.476526	0.627389	0.698675	0.679054			25	1.02697	0.987563	0.985463	1.29745	1.44487	1.40429
	50	0.247166	0.274232	0.246479	0.480892	0.5	0.483108			50	0.965646	1.07139	0.962963	1.87879	1.95344	1.88745
	100	0.117914	0.144208	0.117371	0.283439	0.281457	0.304054			100	0.932143	1.14001	0.927851	2.24067	2.225	2.40364
