# Supplementary material for: Interplay between acetylation and ubiquitination of imitation switch chromatin remodeler Isw1 confers multidrug resistance in Cryptococcus neoformans
Source: eLife journal article supplement (doi:10.7554/elife.85728), 2024-01-22
Supplement: fig8-data1 [file Figure 8-source data 5.xlsx]

## Sheet: Sheet1
	Figure 8h-source data 8h Analyses of the resistance between CDLC141 and CDLC141 OE
	FLC	CDLC141			CDLC141 OE
	0	1	1	1	1	1	1
	2	0.951299	0.902778	0.882943	0.831461	0.844394	0.885321				CDLC141			CDLC141 OE
	4	0.717532	0.753472	0.70903	0.651685	0.640732	0.644495			4	0.987414	1.03687	0.975714	0.8968	0.881728	0.886906
	8	0.636364	0.645833	0.64214	0.4	0.455378	0.442661			8	0.992077	1.00684	1.00108	0.623591	0.709924	0.690098
	16	0.305195	0.340278	0.327759	0.242697	0.244851	0.256881			16	0.940767	1.04891	1.01032	0.748116	0.754757	0.791838
	32	0.185065	0.1875	0.173913	0.107865	0.118993	0.112385			32	1.01595	1.02932	0.95473	0.592147	0.653237	0.616962
	KTC	CDLC141			CDLC141 OE
	0	1	1	1	1	1	1
	0.03125	0.632911	0.663366	0.61165	0.575556	0.553288	0.568075				CDLC141			CDLC141 OE
	0.0625	0.556962	0.554455	0.543689	0.44	0.428571	0.431925			0.0625	1.00953	1.00499	0.985476	0.797532	0.776817	0.782895
	0.125	0.373418	0.376238	0.349515	0.288889	0.294785	0.338028			0.125	1.01918	1.02688	0.953941	0.788474	0.804565	0.922591
	0.25	0.218354	0.231023	0.220065	0.164444	0.160998	0.161972			0.25	0.978521	1.03529	0.986185	0.736932	0.721486	0.725851
	0.5	0.14557	0.165017	0.15534	0.111111	0.111111	0.107981			0.5	0.937292	1.06251	1.0002	0.715421	0.715421	0.695269
	KTC	CDLC141			CDLC141 OE
	0	1	1	1	1	1	1
	6.25	0.666667	0.636964	0.630662	0.741935	0.82093	0.797701				CDLC141			CDLC141 OE
	12.5	0.574074	0.580858	0.56446	0.523041	0.567442	0.577011			12.5	1.00165	1.01348	0.984871	0.912604	0.990074	1.00677
	25	0.503086	0.508251	0.512195	0.370968	0.383721	0.395402			25	0.990632	1.0008	1.00857	0.730476	0.755588	0.77859
	50	0.404321	0.382838	0.376307	0.269585	0.286047	0.28046			50	1.04254	0.98715	0.970308	0.695126	0.737572	0.723166
	100	0.203704	0.20132	0.219512	0.133641	0.125581	0.181609			100	0.978504	0.967055	1.05444	0.641951	0.603239	0.872372
