# Supplementary material for: Interplay between acetylation and ubiquitination of imitation switch chromatin remodeler Isw1 confers multidrug resistance in Cryptococcus neoformans
Source: eLife journal article supplement (doi:10.7554/elife.85728), 2024-01-22
Supplement: fig8-data1 [file Figure 8-source data 6.xlsx]

## Sheet: Sheet1
	Figure 8i-source data 8i Analyses of the resistance between CDLC120 and CDLC120 OE
	FLC	CDLC120			CDLC120 OE
	0	1	1	1	1	1	1
	4	0.797297	0.864516	0.752688	0.690987	0.655039	0.70082			CDLC120			CDLC120 OE
	8	0.628378	0.580645	0.548387	0.480687	0.465116	0.487705		8	1.07268	0.991194	0.936128	0.82056	0.79398	0.83254
	16	0.513514	0.554839	0.462366	0.351931	0.344961	0.385246		16	1.00642	1.08741	0.906174	0.689738	0.676077	0.75503
	32	0.351351	0.387097	0.365591	0.300429	0.29845	0.29918		32	0.954725	1.05186	0.993419	0.816354	0.810975	0.812961
	64	0.324324	0.303226	0.241935	0.111588	0.124031	0.114754		64	1.11902	1.04622	0.834754	0.385014	0.427946	0.395938
	KTC	CDLC120			CDLC120 OE
	0	1	1	1	1	1	1
	0.03125	0.760563	0.702128	0.696552	0.736111	0.710345	0.735714			CDLC120			CDLC120 OE
	0.0625	0.71831	0.624113	0.689655	0.611111	0.627586	0.65		0.0625	1.06046	0.921392	1.01815	0.902196	0.926519	0.959609
	0.125	0.570423	0.539007	0.544828	0.513889	0.503448	0.528571		0.125	1.03446	0.977491	0.988046	0.931939	0.913005	0.958566
	0.25	0.464789	0.439716	0.448276	0.395833	0.427586	0.421429		0.25	1.03074	0.975139	0.994121	0.877821	0.948238	0.934583
	0.5	0.323944	0.319149	0.386207	0.347222	0.344828	0.342857		0.5	0.944167	0.930193	1.12564	1.01202	1.00504	0.999293
	5FC	CDLC120			CDLC120 OE
	0	1	1	1	1	1	1
	12.5	0.781022	0.761194	0.746269	0.683099	0.725352	0.70068			CDLC120			CDLC120 OE
	25	0.591241	0.574627	0.529851	0.478873	0.464789	0.469388		25	1.046	1.01661	0.937392	0.847204	0.822286	0.830423
	50	0.437956	0.447761	0.410448	0.401408	0.394366	0.367347		50	1.01366	1.03635	0.949989	0.929068	0.912768	0.850232
	100	0.430657	0.425373	0.402985	0.302817	0.330986	0.306122		100	1.02618	1.01358	0.960239	0.721557	0.788678	0.729433
	200	0.262774	0.238806	0.231343	0.183099	0.15493	0.176871		200	1.07559	0.97748	0.946934	0.749459	0.634158	0.723967
