# Supplementary material for: Interplay between acetylation and ubiquitination of imitation switch chromatin remodeler Isw1 confers multidrug resistance in Cryptococcus neoformans
Source: eLife journal article supplement (doi:10.7554/elife.85728), 2024-01-22
Supplement: fig8-figsupp1-data1 [file Figure 8-figure supplement 1-source data 1.xlsx]

## Sheet: Sheet1
Figure 8-figure supplement 8b-source data figure 8b isw1-flag/histone
WT			CDLC15			CDLC25			CDLC60			CDLC61			CDLC62			CDLC98			CDLC120
0.825643	1.28001	0.894352	0.314236	0.608888	0.399027	0.44508	0.498371	0.48508	0.446157	0.41055	0.510563	0.386706	0.39107	0.4525	0.499978	0.439195	0.545383	0.442008	0.457881	0.492295	1.26464	1.07959	1.3347
WT			CDLC4			CDLC6			CDLC37			CDLC43			CDLC100			CDLC98
0.866966	1.15856	0.974475	0.753606	0.921803	0.930138	0.972367	0.900864	0.826154	0.745985	0.907471	0.95755	0.831379	0.79401	0.717936	0.859685	0.999906	0.914754	1.0842	1.02951	0.959095
