# Supplementary material for: Interplay between acetylation and ubiquitination of imitation switch chromatin remodeler Isw1 confers multidrug resistance in Cryptococcus neoformans
Source: eLife journal article supplement (doi:10.7554/elife.85728), 2024-01-22
Supplement: fig8-figsupp1-data1 [file Figure 8-figure supplement 1-source data 2.xlsx]

## Sheet: Sheet1
Figure 8-figure supplement 8c-source data figure 8c isw1/actin
	H99			CDLC25			CDLC60			CDLC61			CDLC62			CDLC120
ISW1 RNA	0.979813	0.964414	1.05577	1.1313	1.00053	0.941771	1.25328	0.909572	1.24414	1.2795	0.969652	1.0125	0.963169	0.898397	1.06404	1.00554	1.13837	1.14241
	H99			CDLC98			CDLC125			CDLC135			CDLC141			CDLC150
ISW1 RNA	0.909137	1.14741	0.943458	1.25524	1.31276	1.48377	0.877982	1.07708	1.10685	1.0821	1.03868	1.45537	1.28319	1.16205	1.22403	1.0347	1.12171	0.750693
