# Supplementary material for: Interplay between acetylation and ubiquitination of imitation switch chromatin remodeler Isw1 confers multidrug resistance in Cryptococcus neoformans
Source: eLife. 2024 Jan 22;13:e85728. doi: 10.7554/eLife.85728 (PMC10834027; doi:10.7554/eLife.85728)
Supplement: Supplementary file 2. [file elife-85728-supp2.xlsx]

## Sheet: treated with FLC
Supplementary table 2. DEGs (differentially expressed genes) in isw1D cells treated with FLC.
Gene ID	BaseMean	log2FoldChange	FoldChange	lfcSE	Stat	pvalue	padj	Description
CNAG_05552	726.646	-11.9934	0.000245252	1.17995	-10.1644	2.86002e-24	3.15453e-23	transcription activator snf2l1
CNAG_06366	6.23985	-2.68769	0.155212	0.92652	-2.90084	0.00372164	0.00741549	protein kinase
CNAG_04931	120.115	-2.45466	0.182421	0.20354	-12.0598	1.72174e-33	2.93092e-32	hypothetical
CNAG_03713	769.967	-2.20867	0.216333	0.0905958	-24.3794	2.82689e-131	5.71632e-129	efflux protein EncT
CNAG_05458	668.454	-1.97294	0.254733	0.0852641	-23.1392	1.868e-118	3.2803e-116	endo-1,3(4)-beta-glucanase
CNAG_01121	415.877	-1.97284	0.254751	0.117279	-16.8217	1.69188e-63	8.36288e-62	hypothetical protein
CNAG_04060	45.9074	-1.91083	0.265939	0.3134	-6.09711	1.08004e-09	4.71668e-09	hypothetical protein
CNAG_05032	2890.21	-1.89621	0.268648	0.0576445	-32.8949	2.59604e-237	2.47477e-234	hypothetical protein
CNAG_02441	38.8886	-1.79954	0.287267	0.384642	-4.67847	2.8902e-06	8.95373e-06	hypothetical protein
CNAG_02087	751.633	-1.7606	0.295124	0.082777	-21.2693	2.18709e-100	2.65354e-98	acyl-CoA-dependent ceramide synthase
CNAG_02820	975.972	-1.64723	0.319251	0.0759199	-21.697	2.18938e-104	2.92195e-102	serine/threonine protein kinase
CNAG_05819	177.347	-1.64539	0.31966	0.160314	-10.2635	1.02855e-24	1.16134e-23	hypothetical protein
CNAG_04867	138.554	-1.62841	0.323445	0.172897	-9.41838	4.58094e-21	4.32983e-20	vacuolar protein
CNAG_04524	2927.34	-1.6072	0.328235	0.0457369	-35.1401	1.6445e-270	2.19476e-267	zinc metalloprotease
CNAG_02694	9.26933	-1.58622	0.333043	0.661282	-2.39871	0.0164531	0.0289765	hypothetical protein
CNAG_07940	648.466	-1.57896	0.334722	0.0873069	-18.0852	4.16855e-73	2.83844e-71	hypothetical protein, variant
CNAG_07845	630.4	-1.56232	0.338607	0.0877532	-17.8035	6.63685e-71	4.21787e-69	hypothetical protein
CNAG_05840	342.428	-1.54158	0.343509	0.112058	-13.757	4.62492e-43	1.12635e-41	hypothetical protein
CNAG_03161	1400.19	-1.49011	0.355986	0.0705527	-21.1205	5.15681e-99	5.933e-97	hypothetical protein
CNAG_05842	2093.72	-1.48994	0.356027	0.0546204	-27.2781	7.71024e-164	3.43003e-161	cytochrome P450
CNAG_03486	1384.44	-1.48219	0.357946	0.0672117	-22.0525	9.03447e-108	1.31059e-105	peptidyl-prolyl cis-trans isomerase B
CNAG_04258	158.643	-1.46902	0.361227	0.164259	-8.94333	3.77633e-19	3.16179e-18	arf/Sar family protein
CNAG_01542	653.128	-1.44644	0.366926	0.0870583	-16.6146	5.46324e-62	2.56734e-60	taurine catabolism dioxygenase TauD
CNAG_02192	10.9554	-1.43328	0.370287	0.633264	-2.26332	0.0236157	0.0404382	hypothetical protein
CNAG_06875	383.959	-1.40742	0.376985	0.108475	-12.9746	1.70519e-38	3.49041e-37	allantoate permease
CNAG_03913	1575.35	-1.40179	0.37846	0.120464	-11.6366	2.68583e-31	4.21706e-30	hypothetical protein
CNAG_01653	1116.34	-1.39306	0.380756	0.0729101	-19.1066	2.22624e-81	2.00753e-79	cytokine inducing-glycoprotein
CNAG_07943	1192.55	-1.38549	0.382759	0.0677577	-20.4477	6.29164e-93	6.66414e-91	hypothetical protein
CNAG_02156	680.512	-1.3641	0.388477	0.0968301	-14.0876	4.52891e-45	1.24368e-43	hypothetical protein
CNAG_05412	83.2927	-1.36005	0.389568	0.24444	-5.56396	2.63727e-08	1.00505e-07	hypothetical protein
CNAG_00015	173.479	-1.35626	0.390594	0.159774	-8.48859	2.09157e-17	1.56821e-16	hypothetical protein
CNAG_03782	2851.71	-1.34498	0.39366	0.0552856	-24.3278	9.96027e-131	1.95485e-128	hypothetical protein
CNAG_05853	28.0083	-1.32681	0.398649	0.377544	-3.51432	0.000440887	0.00103157	hypothetical protein
CNAG_07836	161.049	-1.32435	0.399329	0.158297	-8.36621	5.95013e-17	4.37282e-16	NAD binding dehydrogenase
CNAG_05109	12760	-1.30676	0.404228	0.0340772	-38.347	0	0	CBS and PB1 domain-containing protein
CNAG_03177	28.7004	-1.3	0.406127	0.368641	-3.52646	0.000421154	0.000989214	hypothetical protein
CNAG_04059	46.5186	-1.29503	0.407529	0.290635	-4.45585	8.35598e-06	2.4522e-05	hypothetical protein
CNAG_04675	10611.9	-1.28799	0.409521	0.0488749	-26.3528	4.76097e-153	1.3813e-150	hypothetical protein
CNAG_00021	14.9664	-1.27959	0.411912	0.581665	-2.19988	0.0278155	0.0470263	S-adenosylmethionine decarboxylase proenzyme
CNAG_06347	1608.2	-1.27589	0.41297	0.0669405	-19.0601	5.4205e-81	4.8228e-79	hypothetical protein
CNAG_01866	203.195	-1.26866	0.415045	0.161098	-7.87508	3.40531e-15	2.26106e-14	hypothetical protein
CNAG_04103	682.928	-1.26673	0.415601	0.0804399	-15.7475	7.14287e-56	2.82038e-54	hypothetical protein
CNAG_03835	42.1579	-1.26069	0.417343	0.338604	-3.72321	0.000196707	0.00048508	DASH complex subunit DAD3
CNAG_04890	43.9372	-1.25297	0.419585	0.314051	-3.9897	6.61579e-05	0.000174288	hypothetical protein
CNAG_05377	127.022	-1.2499	0.420478	0.177199	-7.05365	1.74284e-12	9.55626e-12	MFS transporter, SP family, solute carrier family 2(myo-inositol transporter), member 13
CNAG_01974	80.2929	-1.247	0.421322	0.224252	-5.56072	2.68662e-08	1.02269e-07	large subunit ribosomal protein L36
CNAG_01237	120.226	-1.24493	0.421928	0.200683	-6.20347	5.52302e-10	2.4835e-09	hypothetical protein
CNAG_03670	561.07	-1.23926	0.42359	0.0866138	-14.3079	1.95373e-46	5.59537e-45	IRE protein kinase
CNAG_03238	164.179	-1.23066	0.426123	0.158499	-7.76446	8.19911e-15	5.29136e-14	dioxygenase subfamily protein
CNAG_05168	410.605	-1.22972	0.426399	0.106871	-11.5066	1.22135e-30	1.86075e-29	hypothetical protein, variant
CNAG_04546	13.9074	-1.22904	0.426601	0.527262	-2.33099	0.019754	0.0342385	multidrug transporter
CNAG_02701	25201.5	-1.22581	0.427557	0.0462692	-26.493	1.16666e-154	3.70719e-152	hypothetical protein
CNAG_02083	26.6691	-1.22018	0.42923	0.416059	-2.9327	0.00336027	0.00673164	siderochrome-iron transporter
CNAG_00815	1723.34	-1.21695	0.430193	0.0573852	-21.2066	8.2953e-100	9.88473e-98	MFS transporter, SIT family, siderophore-iron:Hsymporter
CNAG_04350	2352.97	-1.21607	0.430455	0.0574761	-21.1578	2.34047e-99	2.73999e-97	glycerophosphoryl diester phosphodiesterase
CNAG_08026	168.067	-1.20809	0.432842	0.162909	-7.41573	1.20958e-13	7.17468e-13	hypothetical protein
CNAG_07695	3040.48	-1.20565	0.433575	0.0452897	-26.6208	3.89783e-156	1.30051e-153	gamma-aminobutyric acid transporter
CNAG_00588	13770.3	-1.20455	0.433904	0.0401856	-29.9748	2.0928e-197	1.26957e-194	hypothetical protein
CNAG_02260	266.737	-1.19435	0.436983	0.1293	-9.23705	2.53395e-20	2.30369e-19	protein FAM50
CNAG_04479	101.645	-1.19312	0.437357	0.195717	-6.09614	1.08659e-09	4.73908e-09	hypothetical protein
CNAG_07856	2928.82	-1.18755	0.439048	0.0456633	-26.0066	4.16656e-149	1.06936e-146	hypothetical protein
CNAG_06658	1175.59	-1.18645	0.439383	0.0755174	-15.711	1.27257e-55	4.99522e-54	rhomboid family membrane protein
CNAG_01118	95.3669	-1.18358	0.440257	0.204692	-5.78225	7.37071e-09	2.97729e-08	AAT family amino acid transporter
CNAG_06622	151.298	-1.18039	0.441233	0.163394	-7.22419	5.0409e-13	2.86768e-12	hypothetical protein
CNAG_01272	21881.8	-1.17982	0.441406	0.0380189	-31.0325	1.96575e-211	1.31174e-208	hypothetical protein
CNAG_05333	243.801	-1.17862	0.441775	0.13637	-8.6428	5.48518e-18	4.24132e-17	hypothetical protein
CNAG_02493	1172.73	-1.17756	0.442098	0.0655633	-17.9607	3.95982e-72	2.64239e-70	hypothetical protein
CNAG_07799	836.782	-1.17182	0.44386	0.0746114	-15.7057	1.38225e-55	5.39399e-54	ABC transporter
CNAG_02512	1390.08	-1.17144	0.443976	0.0638553	-18.3453	3.59916e-75	2.63925e-73	DNA repair protein RAD16
CNAG_01594	1485.91	-1.17081	0.444171	0.0597452	-19.5968	1.64739e-85	1.59319e-83	glycine dehydrogenase
CNAG_05187	831.703	-1.15968	0.447611	0.0771633	-15.0289	4.74601e-51	1.5995e-49	hypothetical protein
CNAG_00964	613.636	-1.15417	0.449326	0.0962215	-11.9949	3.77907e-33	6.2887e-32	hypothetical protein
CNAG_06311	1344.8	-1.14759	0.45138	0.0628909	-18.2473	2.17537e-74	1.56089e-72	cytoplasmic protein
CNAG_01525	176.873	-1.14739	0.451443	0.147338	-7.78744	6.83804e-15	4.44306e-14	hypothetical protein
CNAG_02475	1419.51	-1.14243	0.452995	0.0614575	-18.589	3.94535e-77	3.17196e-75	flavin-containing monooxygenase
CNAG_06033	75.1376	-1.14182	0.453188	0.238719	-4.78311	1.72603e-06	5.48988e-06	pfkB family carbohydrate kinase superfamily
CNAG_07492	102.396	-1.13772	0.454478	0.207322	-5.48767	4.07275e-08	1.51914e-07	hypothetical protein
CNAG_06623	4764.76	-1.13755	0.45453	0.0476924	-23.8519	9.67755e-126	1.74536e-123	inositol oxygenase
CNAG_01702	612.845	-1.13349	0.455811	0.0850491	-13.3275	1.60135e-40	3.57384e-39	integral membrane protein
CNAG_03194	1038.65	-1.13291	0.455994	0.0663681	-17.0701	2.47627e-65	1.31144e-63	saccharopine dehydrogenase, variant
CNAG_04243	160.585	-1.13195	0.4563	0.154833	-7.31077	2.65608e-13	1.54391e-12	cell division control protein 24
CNAG_01009	268.475	-1.1299	0.456949	0.124637	-9.06548	1.24055e-19	1.07929e-18	hypothetical protein
CNAG_04380	1191.31	-1.1281	0.457518	0.061804	-18.2528	1.96429e-74	1.42475e-72	peptidase, variant
CNAG_06445	437.395	-1.12763	0.457668	0.0992256	-11.3643	6.29898e-30	9.29936e-29	CMGC/CDK/CDK7 protein kinase
CNAG_07679	287.54	-1.12329	0.459046	0.123296	-9.11052	8.19907e-20	7.18954e-19	transcription elongation factor S-II
CNAG_04681	58.6617	-1.11788	0.46077	0.260638	-4.28902	1.79465e-05	5.0573e-05	hypothetical protein
CNAG_05416	2105.96	-1.11758	0.460865	0.0518058	-21.5726	3.25135e-103	4.25416e-101	pre-mRNA-processing protein 45
CNAG_03076	32.6996	-1.11592	0.461396	0.349339	-3.19438	0.00140133	0.00300677	hypothetical protein
CNAG_04450	3192.04	-1.11372	0.4621	0.0496235	-22.4435	1.48155e-111	2.29917e-109	chromodomain-helicase-DNA-binding protein 1
CNAG_00848	224696	-1.11178	0.462722	0.0265831	-41.823	0	0	hypothetical protein, variant 1
CNAG_02499	36.9968	-1.11164	0.462767	0.324952	-3.42095	0.000624037	0.00141447	hypothetical protein
CNAG_03578	118.563	-1.11042	0.463159	0.183031	-6.06684	1.3045e-09	5.65257e-09	hypothetical protein
CNAG_05181	1645.64	-1.11037	0.463174	0.0602436	-18.4314	7.35829e-76	5.64389e-74	white collar 1 protein
CNAG_05861	60.3653	-1.10773	0.464025	0.258943	-4.27787	1.88689e-05	5.30381e-05	hypothetical protein, variant
CNAG_00137	1661.54	-1.10028	0.466425	0.0618001	-17.8039	6.59108e-71	4.21787e-69	hypothetical protein
CNAG_04552	58.1118	-1.10012	0.466478	0.269791	-4.07768	4.54882e-05	0.000122594	hypothetical protein, variant
CNAG_05449	21023.7	-1.09546	0.467987	0.0391933	-27.9502	6.56009e-172	3.36734e-169	hypothetical protein
CNAG_04582	251.185	-1.09483	0.468192	0.132252	-8.27834	1.24908e-16	9.02068e-16	hypothetical protein
CNAG_04606	3343.87	-1.08551	0.471226	0.0430893	-25.1921	4.89397e-140	1.12612e-137	hypothetical protein
CNAG_06559	648.217	-1.07882	0.473416	0.0849933	-12.693	6.46662e-37	1.26545e-35	cysteine and glycine-rich protein
CNAG_06490	1466.67	-1.0777	0.473785	0.0565947	-19.0423	7.60396e-81	6.67648e-79	CAMK/CAMKL protein kinase
CNAG_03826	355.987	-1.077	0.474014	0.122994	-8.75649	2.01426e-18	1.61358e-17	histone acetyltransferase ESA1
CNAG_00492	50.853	-1.0761	0.474309	0.283738	-3.79259	0.000149086	0.000373864	hypothetical protein
CNAG_03498	40.7534	-1.07456	0.474815	0.31886	-3.37001	0.000751642	0.00168425	metalloreductase
CNAG_03465	1586.54	-1.07233	0.475552	0.0575187	-18.6431	1.4367e-77	1.1836e-75	laccase
CNAG_02299	166.002	-1.06574	0.477729	0.157007	-6.78781	1.13848e-11	5.81259e-11	hypothetical protein
CNAG_03650	229.876	-1.05826	0.48021	0.151134	-7.00215	2.52071e-12	1.36532e-11	hypothetical protein
CNAG_03061	961.99	-1.05582	0.481024	0.0690841	-15.2831	9.91146e-53	3.46278e-51	multiple drug resistance protein
CNAG_00750	101.414	-1.05447	0.481473	0.196596	-5.36364	8.15606e-08	2.93715e-07	hypothetical protein
CNAG_00268	726.351	-1.05438	0.481505	0.0805831	-13.0843	4.0462e-39	8.6263e-38	acetolactate synthase, mitochondrial
CNAG_01418	878.806	-1.05217	0.482243	0.0724763	-14.5174	9.39946e-48	2.87718e-46	hypothetical protein
CNAG_06655	191.982	-1.05069	0.482737	0.151571	-6.932	4.14931e-12	2.21684e-11	phosphatidylinositol glycan, class K
CNAG_00390	666.042	-1.04731	0.483869	0.0800447	-13.0841	4.05996e-39	8.62806e-38	myotubularin
CNAG_05550	780.517	-1.04133	0.485878	0.0816315	-12.7565	2.8667e-37	5.65962e-36	hypothetical protein
CNAG_05337	1381.76	-1.04047	0.48617	0.0591767	-17.5823	3.36373e-69	2.04056e-67	alpha-N-arabinofuranosidase, variant
CNAG_07751	301.609	-1.03474	0.488104	0.121807	-8.49491	1.98079e-17	1.48682e-16	siderophore iron transporter MirB
CNAG_01906	136.981	-1.03368	0.488461	0.174456	-5.9252	3.11918e-09	1.30661e-08	mitochondrial distribution and morphology protein12
CNAG_06346	52.521	-1.03173	0.489122	0.267692	-3.85419	0.000116112	0.00029607	hypothetical protein
CNAG_06698	1195.06	-1.01989	0.493155	0.0679493	-15.0095	6.35914e-51	2.12173e-49	phosphatase
CNAG_04594	636.162	-1.01464	0.494951	0.0840424	-12.073	1.46715e-33	2.51034e-32	hypothetical protein
CNAG_05852	1129.65	-1.01455	0.494984	0.0678421	-14.9545	1.45525e-50	4.80737e-49	heme oxygenase 2
CNAG_03105	26.3756	-1.01183	0.495917	0.383749	-2.6367	0.00837175	0.0156221	hypothetical protein
CNAG_03129	18.4251	-1.00653	0.497741	0.447072	-2.25139	0.0243609	0.0415861	transcription factor iiia
CNAG_02344	163.982	-1.00481	0.498336	0.194009	-5.17918	2.22869e-07	7.73779e-07	uracil phosphoribosyltransferase
CNAG_03911	60.3132	-1.00304	0.498948	0.254827	-3.93616	8.27942e-05	0.000215142	hydrolase
CNAG_07864	166.765	-0.999801	0.500069	0.156029	-6.40781	1.47627e-10	6.91796e-10	U3 small nucleolar ribonucleoprotein IMP3
CNAG_03176	8809.96	-0.996478	0.501222	0.0378981	-26.2936	2.27052e-152	6.313e-150	endoplasmic oxidoreductin 1
CNAG_02868	2221.4	-0.996029	0.501378	0.0484986	-20.5373	1.00012e-93	1.07642e-91	tryptophan 2,3-dioxygenase
CNAG_06119	113.379	-0.994654	0.501856	0.186258	-5.34019	9.28489e-08	3.33466e-07	spermine transporter
CNAG_01124	22.7087	-0.98704	0.504512	0.411137	-2.40075	0.0163613	0.0288224	hypothetical protein
CNAG_05864	7814.71	-0.984794	0.505298	0.0341218	-28.8611	3.67369e-183	2.04288e-180	hypothetical protein
CNAG_05296	914.066	-0.983775	0.505655	0.0718626	-13.6897	1.17052e-42	2.80968e-41	metallochaperone
CNAG_04977	318.665	-0.98373	0.505671	0.113937	-8.63397	5.92566e-18	4.57661e-17	pre-mRNA branch site protein p14
CNAG_02342	414.247	-0.983288	0.505826	0.09833	-9.99988	1.52587e-23	1.61878e-22	hypothetical protein
CNAG_03479	678.659	-0.976983	0.508041	0.0830833	-11.7591	6.34316e-32	1.02241e-30	hypothetical protein
CNAG_07419	160.427	-0.97509	0.508708	0.176877	-5.51283	3.53119e-08	1.32753e-07	hypothetical protein, variant
CNAG_06126	51.0882	-0.974764	0.508823	0.276747	-3.52222	0.000427943	0.0010034	Pin2-interacting protein X1
CNAG_01534	609.273	-0.974699	0.508846	0.0837127	-11.6434	2.4798e-31	3.90276e-30	hypothetical protein
CNAG_05452	102.392	-0.971146	0.510101	0.198904	-4.88249	1.04756e-06	3.39175e-06	hypothetical protein
CNAG_02911	208.497	-0.967565	0.511368	0.137491	-7.0373	1.96005e-12	1.07121e-11	hypothetical protein
CNAG_04073	391.362	-0.966957	0.511584	0.112498	-8.59534	8.30185e-18	6.36031e-17	hypothetical protein
CNAG_06873	122.698	-0.960945	0.51372	0.184608	-5.20531	1.93671e-07	6.76631e-07	5-oxoprolinase
CNAG_05392	180.242	-0.95914	0.514363	0.148434	-6.46173	1.0351e-10	4.92671e-10	specific RNA polymerase II transcription factor
CNAG_01945	146.009	-0.959091	0.514381	0.163611	-5.86201	4.57299e-09	1.87672e-08	hypothetical protein
CNAG_07755	565.896	-0.958856	0.514465	0.178573	-5.36954	7.89375e-08	2.84422e-07	hypothetical protein
CNAG_00080	30.877	-0.955586	0.515632	0.355872	-2.6852	0.00724872	0.0136989	hypothetical protein
CNAG_01354	85.2848	-0.954554	0.516001	0.211999	-4.50264	6.71154e-06	1.99361e-05	hypothetical protein
CNAG_06288	498.004	-0.953687	0.516311	0.0936265	-10.1861	2.28809e-24	2.53628e-23	RNA binding protein
CNAG_05818	2810.45	-0.950959	0.517289	0.048555	-19.5852	2.06884e-85	1.9722e-83	chitin synthase
CNAG_07678	114.382	-0.949512	0.517808	0.189124	-5.02057	5.15173e-07	1.72318e-06	hypothetical protein, variant
CNAG_00456	8831.44	-0.947559	0.518509	0.0376594	-25.1613	1.06299e-139	2.36445e-137	hypothetical protein
CNAG_02658	533.274	-0.945819	0.519135	0.0979669	-9.65448	4.70551e-22	4.67957e-21	hypothetical protein
CNAG_06606	2799.41	-0.944099	0.519754	0.05435	-17.3707	1.37457e-67	7.70799e-66	rho family protein
CNAG_05877	238.805	-0.941155	0.520816	0.13931	-6.75584	1.42013e-11	7.201e-11	CDK-activating kinase assembly factor MAT1
CNAG_07491	465.245	-0.939757	0.521321	0.197123	-4.76736	1.86659e-06	5.92003e-06	glutaredoxin
CNAG_06509	53.6112	-0.937494	0.522139	0.270776	-3.46225	0.000535684	0.00123305	hypothetical protein
CNAG_07465	43.0907	-0.932407	0.523984	0.315493	-2.95539	0.00312273	0.00628596	hypothetical protein
CNAG_00547	901.275	-0.929107	0.525183	0.0713328	-13.025	8.82461e-39	1.83447e-37	hypothetical protein
CNAG_06824	1079.41	-0.926207	0.52624	0.0661447	-14.0027	1.49958e-44	3.93964e-43	hypothetical protein
CNAG_00094	1001.22	-0.923352	0.527283	0.0656826	-14.0578	6.90041e-45	1.86423e-43	NAD-dependent epimerase/dehydratase
CNAG_05281	57.179	-0.915455	0.530177	0.261916	-3.49523	0.000473656	0.00109976	hypothetical protein, variant
CNAG_01591	438.385	-0.915192	0.530273	0.0949124	-9.64249	5.28887e-22	5.2363e-21	hypothetical protein
CNAG_04597	223.793	-0.91219	0.531378	0.13479	-6.76751	1.31014e-11	6.66352e-11	hypothetical protein
CNAG_03746	296.14	-0.909399	0.532407	0.117292	-7.75332	8.95215e-15	5.74401e-14	hypothetical protein
CNAG_06801	276.874	-0.905901	0.533699	0.128872	-7.02949	2.07296e-12	1.13106e-11	hypothetical protein
CNAG_01239	709.631	-0.90578	0.533744	0.0830878	-10.9015	1.13407e-27	1.49854e-26	chitin deacetylase
CNAG_01539	10702.3	-0.905761	0.533751	0.0377349	-24.0033	2.57065e-127	4.76499e-125	myo-inositol-1-phosphate synthase
CNAG_02466	191.509	-0.905114	0.53399	0.141235	-6.40857	1.46887e-10	6.88809e-10	hypothetical protein
CNAG_04981	20673.5	-0.902606	0.53492	0.0288025	-31.3378	1.42857e-215	1.0592e-212	catalase
CNAG_00330	164.225	-0.901739	0.535241	0.158564	-5.68691	1.29358e-08	5.1017e-08	transcription factor TFIIIB component b''
CNAG_06341	27.4664	-0.901728	0.535245	0.39585	-2.27795	0.0227294	0.0390736	hypothetical protein
CNAG_07621	48.7157	-0.900175	0.535822	0.283115	-3.17953	0.00147513	0.00314892	hypothetical protein
CNAG_03314	4088.83	-0.898132	0.536581	0.0433343	-20.7257	2.03344e-95	2.26153e-93	YTH domain family 2
CNAG_05667	86.9891	-0.896486	0.537194	0.222373	-4.03146	5.54315e-05	0.000147663	MFS transporter, SP family, solute carrier family 2(myo-inositol transporter), member 13
CNAG_06340	816.521	-0.895449	0.53758	0.0772129	-11.5971	4.26082e-31	6.6431e-30	pre-rRNA-processing protein TSR4
CNAG_02904	118.501	-0.893911	0.538153	0.18164	-4.92133	8.5957e-07	2.81172e-06	hypothetical protein
CNAG_06114	4321.62	-0.893663	0.538246	0.0393192	-22.7284	2.34558e-114	3.81758e-112	rab family protein
CNAG_03710	1002.83	-0.892498	0.53868	0.0679178	-13.1409	1.92015e-39	4.11998e-38	hypothetical protein
CNAG_06009	1243.17	-0.892052	0.538847	0.0663355	-13.4476	3.18066e-41	7.17046e-40	cyclohydrolase
CNAG_06336	4179.51	-0.891958	0.538882	0.0417059	-21.3869	1.77049e-101	2.18786e-99	glucan 1,3-beta-glucosidase
CNAG_07784	32.996	-0.88791	0.540396	0.403722	-2.19931	0.0278557	0.0470824	hypothetical protein
CNAG_07351	575.582	-0.887284	0.540631	0.091675	-9.67858	3.71832e-22	3.70887e-21	hypothetical protein
CNAG_05855	5823.58	-0.887235	0.540649	0.0445412	-19.9194	2.76093e-88	2.74981e-86	hypothetical protein
CNAG_00627	364.984	-0.886852	0.540793	0.128548	-6.899	5.23685e-12	2.78007e-11	specific transcriptional repressor
CNAG_01847	1314.24	-0.88676	0.540827	0.140094	-6.32976	2.45545e-10	1.13314e-09	hypothetical protein
CNAG_07493	763.917	-0.884844	0.541546	0.0806234	-10.975	5.03924e-28	6.75238e-27	hypothetical protein
CNAG_07550	66.7355	-0.884623	0.541629	0.245781	-3.59923	0.000319161	0.00076555	hypothetical protein
CNAG_07386	98.0175	-0.881523	0.542794	0.193764	-4.54946	5.37847e-06	1.61378e-05	hypothetical protein
CNAG_05239	65.3957	-0.880945	0.543011	0.235462	-3.74135	0.000183037	0.000452876	cytoplasmic protein
CNAG_05839	580.63	-0.880832	0.543054	0.0938167	-9.38887	6.06479e-21	5.70004e-20	cytochrome c oxidase subunit 6b, variant
CNAG_06680	428.016	-0.878629	0.543884	0.0971292	-9.04598	1.48327e-19	1.2755e-18	COP9 signalosome complex subunit 6
CNAG_07651	173.661	-0.87787	0.54417	0.149548	-5.87014	4.35424e-09	1.79357e-08	DEAD-box ATP-dependent RNA helicase 26
CNAG_03613	94.5163	-0.877343	0.544369	0.217046	-4.04219	5.29534e-05	0.000141683	hypothetical protein
CNAG_01663	41.7824	-0.877098	0.544462	0.302323	-2.90119	0.00371746	0.00740938	dynactin 4
CNAG_03415	62.2722	-0.876481	0.544694	0.251569	-3.48406	0.00049386	0.0011419	hypothetical protein
CNAG_04696	94.0411	-0.876311	0.544758	0.218348	-4.01337	5.98592e-05	0.000158508	DNA clamp loader
CNAG_00378	30.8874	-0.875144	0.545199	0.347394	-2.51917	0.0117632	0.0213479	hypothetical protein
CNAG_04920	3790.18	-0.875072	0.545227	0.0465857	-18.7841	1.01822e-78	8.71099e-77	galactose transporter, variant
CNAG_05733	558.245	-0.872274	0.546285	0.0870813	-10.0168	1.2862e-23	1.37545e-22	cytoplasmic protein
CNAG_01448	1879.5	-0.870327	0.547023	0.0550662	-15.8051	2.86866e-56	1.14626e-54	hypothetical protein
CNAG_07499	1207.81	-0.864335	0.5493	0.065229	-13.2508	4.46621e-40	9.77149e-39	chitin synthase
CNAG_06230	96.7554	-0.864004	0.549425	0.212879	-4.05866	4.93561e-05	0.000132536	hypothetical protein
CNAG_01779	755.701	-0.863313	0.549689	0.0793105	-10.8852	1.35567e-27	1.78078e-26	hypothetical protein
CNAG_00839	229.895	-0.86233	0.550064	0.132508	-6.50777	7.62748e-11	3.68027e-10	mitochondrial protein
CNAG_02751	53130.8	-0.86087	0.55062	0.0325789	-26.4242	7.22912e-154	2.19272e-151	short-chain dehydrogenase
CNAG_07532	250.211	-0.860598	0.550724	0.122792	-7.00857	2.40758e-12	1.30829e-11	hypothetical protein
CNAG_01814	88.3565	-0.860522	0.550753	0.207859	-4.13993	3.47404e-05	9.46989e-05	hypothetical protein
CNAG_00740	1019.31	-0.8596	0.551105	0.07051	-12.1912	3.46381e-34	6.08263e-33	hypothetical protein
CNAG_00559	4284.53	-0.859495	0.551145	0.0464413	-18.5071	1.80845e-76	1.41974e-74	hypothetical protein
CNAG_06568	675.567	-0.85919	0.551262	0.197369	-4.35321	1.34159e-05	3.84389e-05	RAN protein kinase
CNAG_01159	781.422	-0.856906	0.552135	0.0740136	-11.5777	5.34704e-31	8.25944e-30	pre-mRNA-splicing factor SLU7
CNAG_01771	942.622	-0.856511	0.552287	0.0702026	-12.2005	3.08739e-34	5.46476e-33	hypothetical protein
CNAG_07393	45.7118	-0.854216	0.553166	0.282895	-3.01955	0.00253149	0.00517386	hypothetical protein
CNAG_03639	253.431	-0.853658	0.55338	0.123204	-6.92881	4.24387e-12	2.26555e-11	hypothetical protein
CNAG_02548	389.724	-0.853602	0.553401	0.1019	-8.37688	5.43502e-17	4.00308e-16	cobalamin synthesis protein
CNAG_03199	131.721	-0.852655	0.553765	0.178271	-4.78291	1.72775e-06	5.49276e-06	FAD dependent oxidoreductase
CNAG_02964	176.58	-0.84889	0.555212	0.152308	-5.57351	2.49662e-08	9.54179e-08	hypothetical protein
CNAG_00769	923.091	-0.848253	0.555457	0.0719912	-11.7827	4.79116e-32	7.77893e-31	STE/STE7 protein kinase
CNAG_03871	277.688	-0.845014	0.556706	0.123613	-6.83597	8.14526e-12	4.20366e-11	phosphotyrosine protein phosphatase
CNAG_04234	216.603	-0.844714	0.556821	0.136931	-6.16891	6.87616e-10	3.06306e-09	hypothetical protein
CNAG_00050	333.897	-0.84444	0.556927	0.114202	-7.39426	1.42202e-13	8.39006e-13	hypothetical protein
CNAG_07814	191.161	-0.843787	0.557179	0.141157	-5.97767	2.26358e-09	9.62095e-09	hypothetical protein
CNAG_07669	1882.41	-0.842134	0.557818	0.0558627	-15.0751	2.36247e-51	8.0845e-50	sorting nexin-3
CNAG_01016	1375.93	-0.842078	0.55784	0.0616658	-13.6555	1.87184e-42	4.44511e-41	vacuolar membrane protein
CNAG_08008	1531.36	-0.840782	0.558341	0.0560281	-15.0064	6.66337e-51	2.21217e-49	hypothetical protein
CNAG_04093	225.329	-0.839873	0.558693	0.136624	-6.14731	7.88079e-10	3.48962e-09	hypothetical protein
CNAG_04622	1161.12	-0.838352	0.559282	0.0629342	-13.3211	1.74553e-40	3.85693e-39	endoplasmic reticulum protein
CNAG_02164	10451.5	-0.835893	0.560236	0.0389902	-21.4385	5.84058e-102	7.35362e-100	hypothetical protein
CNAG_05785	170.822	-0.83583	0.560261	0.153003	-5.46282	4.68618e-08	1.72959e-07	hypothetical protein
CNAG_03490	328.338	-0.834881	0.560629	0.108672	-7.68258	1.55922e-14	9.8343e-14	hypothetical protein
CNAG_04744	21894.9	-0.832442	0.561578	0.0324125	-25.6828	1.82111e-145	4.3401e-143	mannose-6-phosphate isomerase, class I
CNAG_06785	106.343	-0.83219	0.561676	0.195189	-4.26352	2.01234e-05	5.64217e-05	kynurenine 3-monooxygenase
CNAG_03918	494.745	-0.828016	0.563303	0.113352	-7.30483	2.7762e-13	1.60812e-12	hypothetical protein
CNAG_01494	248.177	-0.827204	0.563621	0.134813	-6.13591	8.46712e-10	3.73932e-09	hypothetical protein
CNAG_07641	798.104	-0.826963	0.563715	0.0777149	-10.641	1.92095e-26	2.36941e-25	monosaccharide transporter
CNAG_04337	87.7139	-0.826196	0.564014	0.217226	-3.8034	0.000142723	0.000358716	cation diffusion facilitator
CNAG_04794	2027.95	-0.824659	0.564615	0.0523663	-15.7479	7.09967e-56	2.82e-54	spermine transporter
CNAG_03841	3725.7	-0.824597	0.56464	0.0427399	-19.2934	6.10411e-83	5.57983e-81	hypothetical protein
CNAG_07701	589.461	-0.824535	0.564664	0.0895676	-9.20573	3.39357e-20	3.04372e-19	hypothetical protein
CNAG_05115	530.887	-0.823162	0.565202	0.0889098	-9.2584	2.07526e-20	1.89183e-19	sarcosine oxidase
CNAG_01986	1447.56	-0.822649	0.565403	0.0589275	-13.9604	2.72079e-44	7.06452e-43	hypothetical protein
CNAG_05874	27800.4	-0.822498	0.565462	0.0361302	-22.7649	1.02278e-114	1.70625e-112	hypothetical protein
CNAG_00388	374.475	-0.821507	0.56585	0.103741	-7.91887	2.39688e-15	1.60425e-14	1-phosphatidylinositol-4-phosphate 5-kinase
CNAG_00274	125.734	-0.820364	0.566299	0.173052	-4.74055	2.13135e-06	6.7119e-06	hypothetical protein
CNAG_03848	217.612	-0.817544	0.567407	0.132886	-6.1522	7.64152e-10	3.38591e-09	glutathione transferase
CNAG_01972	749.056	-0.815556	0.568189	0.088735	-9.19092	3.89484e-20	3.47e-19	C2H2 zinc finger protein Zas1A
CNAG_07544	40.2636	-0.814634	0.568553	0.301617	-2.70089	0.00691546	0.0131285	sterol esterase
CNAG_03978	2459.97	-0.813969	0.568815	0.0548615	-14.8368	8.47059e-50	2.73064e-48	hypothetical protein
CNAG_03998	1064.29	-0.813485	0.569006	0.0672025	-12.105	9.93886e-34	1.71819e-32	transcriptional activator
CNAG_06693	449.134	-0.810255	0.570281	0.0959882	-8.44119	3.14133e-17	2.33431e-16	hypothetical protein
CNAG_07519	776.507	-0.808328	0.571043	0.0731013	-11.0577	2.01297e-28	2.75257e-27	hypothetical protein
CNAG_00077	1389.78	-0.807313	0.571445	0.0633379	-12.7461	3.27611e-37	6.44882e-36	solute carrier family 26 (sodium-independentsulfate anion transporter), member 11
CNAG_01038	371.792	-0.806017	0.571959	0.106681	-7.55541	4.17552e-14	2.56096e-13	hypothetical protein
CNAG_06365	1066.56	-0.805048	0.572343	0.0663363	-12.1359	6.81901e-34	1.1819e-32	derlin-2/3
CNAG_06278	2338	-0.804142	0.572703	0.0525931	-15.2899	8.93145e-53	3.13682e-51	hypothetical protein
CNAG_01242	7252.94	-0.801953	0.573572	0.0410706	-19.5262	6.57156e-85	6.17634e-83	hypothetical protein
CNAG_07645	119.791	-0.79909	0.574712	0.17656	-4.52588	6.01441e-06	1.79571e-05	hypothetical protein
CNAG_02770	163.901	-0.796867	0.575598	0.155546	-5.12303	3.00666e-07	1.03101e-06	transcription initiation factor TFIID subunit 11
CNAG_04817	61.5556	-0.794067	0.576716	0.242014	-3.28107	0.00103413	0.00226919	hypothetical protein
CNAG_04127	471.609	-0.793359	0.576999	0.103096	-7.69533	1.4113e-14	8.95207e-14	pre-mRNA-splicing factor CWC24
CNAG_00814	65.1992	-0.793295	0.577025	0.240884	-3.29327	0.000990305	0.00217808	hypothetical protein
CNAG_00794	262.929	-0.792688	0.577268	0.126279	-6.2773	3.44511e-10	1.57676e-09	hypothetical protein
CNAG_04987	830.935	-0.792548	0.577324	0.0732687	-10.817	2.85961e-27	3.68382e-26	hypothetical protein
CNAG_08019	142.681	-0.790008	0.578341	0.168522	-4.68785	2.76084e-06	8.57685e-06	hypothetical protein
CNAG_02882	81.5746	-0.786456	0.579766	0.221346	-3.55307	0.000380764	0.000901326	hypothetical protein
CNAG_00720	151.972	-0.785813	0.580025	0.159934	-4.91335	8.95329e-07	2.92439e-06	DNA repair protein RAD51
CNAG_02533	193.228	-0.785308	0.580228	0.145426	-5.40005	6.6624e-08	2.42676e-07	hypothetical protein
CNAG_00269	83.6166	-0.78504	0.580336	0.21653	-3.62555	0.000288349	0.0006964	sorbitol dehydrogenase
CNAG_03869	495.745	-0.783227	0.581065	0.0982685	-7.97028	1.5831e-15	1.07358e-14	hypothetical protein
CNAG_04992	2024	-0.7829	0.581197	0.0528268	-14.8201	1.0859e-49	3.48374e-48	hypothetical protein
CNAG_07340	86.0233	-0.782789	0.581242	0.20901	-3.74522	0.000180235	0.000446772	hypothetical protein
CNAG_02162	67.8206	-0.782583	0.581325	0.237276	-3.2982	0.000973071	0.00214513	U3 small nucleolar RNA-associated protein 24
CNAG_01611	355.88	-0.782491	0.581362	0.114344	-6.84329	7.73961e-12	4.02231e-11	hypothetical protein
CNAG_03914	427.424	-0.782061	0.581535	0.0978255	-7.99445	1.30151e-15	8.86224e-15	hypothetical protein, variant
CNAG_06653	34.5037	-0.781553	0.58174	0.333738	-2.34182	0.0191902	0.0333653	hypothetical protein, variant
CNAG_04026	184.18	-0.779462	0.582584	0.144956	-5.37725	7.56327e-08	2.73548e-07	chromosome transmission fidelity protein 1
CNAG_03419	371.849	-0.779057	0.582748	0.12684	-6.14202	8.14766e-10	3.60539e-09	ATP-dependent RNA helicase DDX41
CNAG_02777	325.202	-0.778575	0.582942	0.111222	-7.00016	2.5567e-12	1.38369e-11	phosphate:H symporter, variant
CNAG_00152	232.185	-0.778415	0.583007	0.130331	-5.97261	2.33483e-09	9.91113e-09	hypothetical protein
CNAG_02104	2548.81	-0.778047	0.583156	0.0469186	-16.5829	9.26484e-62	4.29335e-60	phosphatidylinositol transfer protein SFH5
CNAG_05915	9829.22	-0.777772	0.583267	0.0428018	-18.1715	8.68364e-74	6.03604e-72	hypothetical protein
CNAG_01647	2146.4	-0.776705	0.583698	0.0538342	-14.4277	3.463e-47	1.03626e-45	translocation protein SEC66
CNAG_05870	37.998	-0.776476	0.583791	0.320965	-2.41919	0.0155551	0.0274964	hypothetical protein
CNAG_07413	144.492	-0.774535	0.584577	0.179463	-4.31584	1.59e-05	4.51301e-05	nucleolar GTP-binding protein 2
CNAG_02510	4871.05	-0.774412	0.584627	0.0441908	-17.5243	9.35168e-69	5.47401e-67	hypothetical protein, variant 1
CNAG_01730	251.223	-0.774195	0.584715	0.126064	-6.14128	8.18569e-10	3.61982e-09	STE/STE7/MEK1 protein kinase
CNAG_02089	821.924	-0.773025	0.585189	0.0801487	-9.64489	5.16672e-22	5.12296e-21	hypothetical protein
CNAG_00860	124.151	-0.77236	0.585459	0.183937	-4.19905	2.68032e-05	7.41532e-05	hypothetical protein
CNAG_06060	4337.56	-0.771062	0.585986	0.042	-18.3586	2.81738e-75	2.1124e-73	hypothetical protein
CNAG_04634	2492.06	-0.770921	0.586043	0.0460695	-16.7339	7.42498e-63	3.56453e-61	hypothetical protein
CNAG_03859	1727.18	-0.770876	0.586061	0.0543062	-14.195	9.839e-46	2.73565e-44	transcriptional regulator Medusa
CNAG_06613	1226.36	-0.770344	0.586277	0.0657303	-11.7198	1.00928e-31	1.61898e-30	endoplasmic reticulum protein
CNAG_00013	464.264	-0.770154	0.586355	0.0934814	-8.23857	1.74278e-16	1.2559e-15	hypothetical protein
CNAG_03377	197.123	-0.769862	0.586473	0.145402	-5.29471	1.19204e-07	4.23336e-07	hypothetical protein
CNAG_00653	208.268	-0.769722	0.58653	0.136225	-5.65037	1.60099e-08	6.23666e-08	hypothetical protein, variant 2
CNAG_00361	3163.78	-0.769287	0.586707	0.0464631	-16.5569	1.42678e-61	6.52115e-60	hypothetical protein
CNAG_01717	421.088	-0.769249	0.586723	0.0955763	-8.04853	8.37909e-16	5.78218e-15	cell differentiation protein rcd1
CNAG_04177	240.391	-0.768713	0.586941	0.131999	-5.82365	5.75778e-09	2.34421e-08	COP9 signalosome complex subunit 7
CNAG_03336	1689.39	-0.766989	0.587643	0.0578186	-13.2654	3.67281e-40	8.06205e-39	hypothetical protein
CNAG_06327	4150.01	-0.766941	0.587662	0.0435506	-17.6104	2.05152e-69	1.26757e-67	DNA-binding protein creA, variant
CNAG_00014	90.9024	-0.766158	0.587981	0.205955	-3.72002	0.000199209	0.000490887	hypothetical protein
CNAG_00858	215.307	-0.764736	0.588561	0.135306	-5.65189	1.58697e-08	6.18928e-08	hypothetical protein
CNAG_06657	317.483	-0.763949	0.588882	0.111752	-6.83614	8.13573e-12	4.20199e-11	hypothetical protein
CNAG_00639	227.92	-0.763717	0.588977	0.128176	-5.95834	2.54819e-09	1.07689e-08	hypothetical protein
CNAG_03413	731.853	-0.763634	0.589011	0.0774493	-9.85979	6.21817e-23	6.44314e-22	alginate lyase
CNAG_02540	190.861	-0.763296	0.589149	0.14573	-5.23773	1.62563e-07	5.70937e-07	hypothetical protein
CNAG_02709	67.5226	-0.762189	0.589601	0.256419	-2.97243	0.00295453	0.00596898	small subunit ribosomal protein S19
CNAG_01992	86.7139	-0.761396	0.589925	0.248036	-3.0697	0.00214272	0.0044474	hypothetical protein
CNAG_01338	1309.09	-0.761193	0.590008	0.0605866	-12.5637	3.34204e-36	6.39009e-35	xeroderma pigmentosum group C-complementingprotein
CNAG_04599	1132.9	-0.760625	0.590241	0.0691392	-11.0014	3.76441e-28	5.08501e-27	3-methyl-2-oxobutanoate hydroxymethyltransferase
CNAG_05587	647.559	-0.760335	0.590359	0.0827877	-9.18416	4.14753e-20	3.68528e-19	hypothetical protein
CNAG_00515	2688.83	-0.760334	0.59036	0.0516071	-14.7331	3.94967e-49	1.25505e-47	mannitol dehydrogenase
CNAG_04098	4231.17	-0.758676	0.591038	0.0447558	-16.9515	1.87682e-64	9.63389e-63	ATP-binding cassette, subfamily G (WHITE), member2, PDR
CNAG_05515	159.699	-0.758167	0.591247	0.160945	-4.71072	2.46839e-06	7.71863e-06	hypothetical protein
CNAG_03136	806.391	-0.758071	0.591286	0.0735158	-10.3117	6.24004e-25	7.1498e-24	hypothetical protein
CNAG_07348	1044.96	-0.757211	0.591639	0.0655575	-11.5503	7.35353e-31	1.12546e-29	phosphopantothenoylcysteine decarboxylase
CNAG_01929	97.8092	-0.756624	0.59188	0.226054	-3.3471	0.000816631	0.0018201	hypothetical protein
CNAG_04313	3339.93	-0.756571	0.591901	0.048254	-15.6789	2.10729e-55	8.17555e-54	NADPH2 dehydrogenase
CNAG_06642	3487.75	-0.754799	0.592629	0.0462674	-16.3139	7.86592e-60	3.45324e-58	Atypical/PIKK/FRAP protein kinase
CNAG_05063	375.547	-0.754683	0.592677	0.105735	-7.1375	9.50449e-13	5.3074e-12	STE/STE11/SSK protein kinase
CNAG_03893	198.929	-0.754557	0.592728	0.150195	-5.02385	5.06446e-07	1.69569e-06	MAP kinase phosphatase
CNAG_06898	497.77	-0.754091	0.59292	0.0961001	-7.84694	4.26316e-15	2.80553e-14	chitin synthase export chaperone
CNAG_05295	908.273	-0.752854	0.593428	0.071902	-10.4706	1.17941e-25	1.39295e-24	hypothetical protein
CNAG_00876	945.83	-0.751722	0.593894	0.0716288	-10.4947	9.13889e-26	1.08319e-24	ferric-chelate reductase
CNAG_01526	5178.36	-0.751546	0.593967	0.0419474	-17.9164	8.78278e-72	5.74583e-70	cleavage and polyadenylation specificity factorsubunit 4
CNAG_04888	272.968	-0.751363	0.594042	0.132848	-5.65582	1.55108e-08	6.06704e-08	hypothetical protein
CNAG_01376	2184.87	-0.750559	0.594373	0.0499273	-15.033	4.46037e-51	1.51087e-49	stress response protein NST1
CNAG_00809	1822.29	-0.750553	0.594376	0.0552116	-13.5941	4.33896e-42	1.00534e-40	ATP-dependent RNA helicase ded1
CNAG_00240	243.41	-0.748987	0.595021	0.126126	-5.9384	2.87819e-09	1.21404e-08	hypothetical protein
CNAG_05973	35.1483	-0.748581	0.595189	0.321684	-2.32707	0.0199615	0.0345712	serine carboxypeptidase
CNAG_05111	746.31	-0.746963	0.595856	0.0785424	-9.51032	1.90072e-21	1.83553e-20	hypothetical protein
CNAG_04724	2242.27	-0.746584	0.596013	0.0483882	-15.4291	1.04391e-53	3.84864e-52	ubiquitin-protein ligase E3 C
CNAG_06276	1912.37	-0.745165	0.5966	0.0537002	-13.8764	8.80646e-44	2.22597e-42	hypothetical protein
CNAG_06105	68.4814	-0.745027	0.596657	0.236783	-3.14645	0.00165266	0.00349658	hypothetical protein
CNAG_06872	53.7521	-0.744589	0.596838	0.260527	-2.85802	0.004263	0.00838896	5-oxoprolinase
CNAG_01773	281.034	-0.744564	0.596848	0.125463	-5.93453	2.94693e-09	1.23834e-08	beclin 1
CNAG_07498	592.886	-0.744197	0.597	0.0826688	-9.00215	2.21337e-19	1.88151e-18	hypothetical protein
CNAG_01130	445.772	-0.744155	0.597017	0.0946774	-7.85991	3.84417e-15	2.53982e-14	hypothetical protein
CNAG_03870	1248.99	-0.74383	0.597152	0.0610002	-12.1939	3.34988e-34	5.91369e-33	delta8-fatty-acid desaturase
CNAG_07549	187.278	-0.743665	0.59722	0.145953	-5.09525	3.48287e-07	1.18699e-06	hypothetical protein
CNAG_05697	378.292	-0.742887	0.597542	0.104107	-7.13578	9.62425e-13	5.36979e-12	hypothetical protein
CNAG_01131	647.476	-0.742724	0.59761	0.0890318	-8.34224	7.28973e-17	5.33967e-16	hypothetical protein
CNAG_03543	2527.61	-0.742693	0.597623	0.0483831	-15.3503	3.52719e-53	1.26543e-51	hypothetical protein, variant
CNAG_07566	89.7094	-0.739479	0.598955	0.215248	-3.43547	0.000591529	0.00134857	hypothetical protein
CNAG_00070	530.637	-0.738994	0.599157	0.0927995	-7.96334	1.67458e-15	1.13331e-14	hypothetical protein
CNAG_05293	486.545	-0.738744	0.599261	0.0999512	-7.39105	1.45673e-13	8.58724e-13	glycogenin glucosyltransferase
CNAG_01993	63.4326	-0.738667	0.599293	0.244351	-3.02298	0.00250303	0.00512196	hypothetical protein
CNAG_06396	2889.12	-0.737948	0.599592	0.102103	-7.22748	4.92038e-13	2.80151e-12	hypothetical protein
CNAG_06986	207.391	-0.736915	0.600021	0.143941	-5.11955	3.06264e-07	1.04805e-06	sugar transporter
CNAG_01207	106.699	-0.736719	0.600103	0.199249	-3.69748	0.000217754	0.000532847	hypothetical protein
CNAG_05138	17030.2	-0.736032	0.600388	0.033826	-21.7594	5.63135e-105	7.82876e-103	glucan 1,3-beta-glucosidase
CNAG_02685	39881.2	-0.735859	0.60046	0.0275229	-26.7362	1.7854e-157	6.2705e-155	hypothetical protein
CNAG_06273	307.409	-0.735053	0.600796	0.112672	-6.5238	6.85477e-11	3.32185e-10	hypothetical protein
CNAG_04359	2642.2	-0.734935	0.600845	0.0522361	-14.0695	5.85026e-45	1.59995e-43	hypothetical protein
CNAG_04639	2185.84	-0.733859	0.601293	0.0487595	-15.0506	3.42124e-51	1.16479e-49	hypothetical protein
CNAG_07327	66.8932	-0.733482	0.60145	0.245438	-2.98846	0.00280389	0.00568014	hypothetical protein
CNAG_06473	1561.44	-0.731074	0.602455	0.0593653	-12.3149	7.53546e-35	1.35903e-33	hypothetical protein
CNAG_01370	63.7973	-0.730999	0.602487	0.24485	-2.9855	0.00283112	0.00572835	hypothetical protein
CNAG_00359	141.545	-0.726068	0.604549	0.166217	-4.36819	1.25282e-05	3.60936e-05	hypothetical protein
CNAG_07690	132.086	-0.72598	0.604586	0.176405	-4.11541	3.86486e-05	0.000104966	hypothetical protein
CNAG_06722	642.103	-0.724938	0.605023	0.0796967	-9.09621	9.35355e-20	8.18037e-19	hypothetical protein
CNAG_02166	4623.13	-0.724686	0.605129	0.0403392	-17.9648	3.67694e-72	2.4784e-70	DNA-directed RNA polymerase II subunit RPB1
CNAG_05765	1536.86	-0.724468	0.60522	0.0595537	-12.165	4.77645e-34	8.34378e-33	ubiquitin-conjugating enzyme E2 J2
CNAG_02760	698.047	-0.72387	0.605471	0.084466	-8.56995	1.03527e-17	7.88622e-17	hypothetical protein
CNAG_01989	258.191	-0.723122	0.605785	0.130429	-5.54419	2.95316e-08	1.12096e-07	hypothetical protein
CNAG_04043	2993.57	-0.722821	0.605912	0.0453847	-15.9265	4.14664e-57	1.70806e-55	hypothetical protein
CNAG_02134	759.296	-0.721825	0.60633	0.0809112	-8.9212	4.61261e-19	3.82835e-18	hypothetical protein
CNAG_03839	3369.48	-0.72112	0.606626	0.0425983	-16.9284	2.7792e-64	1.4157e-62	CCR4-NOT transcription complex subunit 4
CNAG_05430	318.6	-0.72075	0.606782	0.109145	-6.60358	4.01341e-11	1.96489e-10	hypothetical protein
CNAG_06030	650.956	-0.720433	0.606915	0.0821095	-8.77406	1.7234e-18	1.38724e-17	hypothetical protein
CNAG_00139	19086.4	-0.720359	0.606946	0.0323247	-22.2851	5.15752e-110	7.64803e-108	hypothetical protein
CNAG_07876	189.25	-0.718587	0.607692	0.155001	-4.63601	3.55197e-06	1.08976e-05	hypothetical protein
CNAG_00183	1302.47	-0.718459	0.607746	0.0677086	-10.611	2.64762e-26	3.22401e-25	alternative cyclin Pcl12, variant
CNAG_05423	159.84	-0.717438	0.608177	0.152102	-4.71683	2.39551e-06	7.49777e-06	SET domain-containing protein
CNAG_01444	125.797	-0.717158	0.608295	0.175583	-4.08445	4.41819e-05	0.000119266	DNA-directed RNA polymerase II subunit RPB4
CNAG_06765	523.096	-0.717079	0.608328	0.0879983	-8.14879	3.67594e-16	2.60398e-15	hypothetical protein
CNAG_01071	226.825	-0.716473	0.608584	0.142467	-5.02905	4.92916e-07	1.65288e-06	hypothetical protein
CNAG_05581	4297.84	-0.714791	0.609293	0.0398357	-17.9435	5.39755e-72	3.56612e-70	chitin synthase
CNAG_02423	3803.83	-0.714489	0.609421	0.0497446	-14.3631	8.81332e-47	2.60227e-45	hypothetical protein
CNAG_03045	1078.41	-0.711379	0.610736	0.065457	-10.8679	1.63951e-27	2.14519e-26	hypothetical protein
CNAG_01420	1422.8	-0.710732	0.61101	0.0699946	-10.1541	3.17769e-24	3.49336e-23	hypothetical protein
CNAG_00322	592.209	-0.710407	0.611148	0.0916527	-7.75107	9.11184e-15	5.83525e-14	hypothetical protein
CNAG_00454	412.246	-0.709679	0.611456	0.0971686	-7.30358	2.80207e-13	1.6217e-12	hypothetical protein
CNAG_07027	1304.73	-0.708547	0.611936	0.0586553	-12.0799	1.34966e-33	2.3212e-32	protein SPT2
CNAG_05180	1409	-0.708159	0.612101	0.0627988	-11.2766	1.71158e-29	2.4829e-28	hypothetical protein
CNAG_05106	321.415	-0.707921	0.612202	0.113537	-6.23518	4.51257e-10	2.04846e-09	hypothetical protein
CNAG_00404	438.087	-0.704856	0.613504	0.104213	-6.76361	1.34597e-11	6.83016e-11	RING zinc finger protein
CNAG_07646	49.5302	-0.704839	0.613511	0.275071	-2.56239	0.0103955	0.0190365	hypothetical protein
CNAG_02044	118.875	-0.704516	0.613648	0.203347	-3.46461	0.000531002	0.0012227	hypothetical protein
CNAG_00474	563.883	-0.703757	0.613971	0.0921157	-7.63993	2.17346e-14	1.35928e-13	hypothetical protein
CNAG_01639	255.863	-0.702467	0.61452	0.121632	-5.77536	7.67902e-09	3.09433e-08	elongation factor G, mitochondrial
CNAG_00025	1688.43	-0.70184	0.614788	0.0575577	-12.1937	3.35955e-34	5.91511e-33	calcium/proton exchanger
CNAG_02867	303.482	-0.701632	0.614876	0.120192	-5.83758	5.29636e-09	2.16163e-08	phosphatidylinositol phospholipase C, delta
CNAG_01392	180.073	-0.701475	0.614943	0.153927	-4.55718	5.18455e-06	1.5584e-05	hypothetical protein
CNAG_00758	243.621	-0.700568	0.61533	0.130975	-5.34888	8.85022e-08	3.18026e-07	regulatory protein ral2
CNAG_03032	739.575	-0.700403	0.6154	0.0765809	-9.14592	5.91221e-20	5.22545e-19	dynactin 2, variant
CNAG_00647	327.5	-0.700372	0.615413	0.122418	-5.72116	1.058e-08	4.22503e-08	hypothetical protein
CNAG_02676	437.129	-0.699091	0.61596	0.0963916	-7.25261	4.08808e-13	2.34564e-12	hypothetical protein
CNAG_00663	3041.1	-0.698408	0.616252	0.0494811	-14.1147	3.08535e-45	8.50767e-44	hypothetical protein
CNAG_07420	215.314	-0.697243	0.61675	0.130942	-5.3248	1.01062e-07	3.6199e-07	hypothetical protein
CNAG_00605	19942	-0.69601	0.617277	0.0373193	-18.6501	1.25956e-77	1.05063e-75	cytoplasmic protein
CNAG_01513	75.295	-0.695929	0.617312	0.22986	-3.02762	0.0024649	0.00505168	hypothetical protein
CNAG_07333	1523.01	-0.695607	0.617449	0.0577953	-12.0357	2.30641e-33	3.90626e-32	ubiquitin carboxyl-terminal hydrolase 25/28
CNAG_04437	226.838	-0.695202	0.617623	0.134928	-5.1524	2.57178e-07	8.87817e-07	nicotinamide riboside kinase
CNAG_05415	222.695	-0.694149	0.618074	0.128778	-5.39027	7.03509e-08	2.54998e-07	hypothetical protein
CNAG_04525	446.697	-0.693903	0.618179	0.0959044	-7.23536	4.64286e-13	2.65028e-12	glycosylphosphatidylinositol transamidase
CNAG_01533	1562.59	-0.692465	0.618796	0.0570042	-12.1476	5.90707e-34	1.02919e-32	rho GTPase activator
CNAG_02826	169.771	-0.691808	0.619078	0.147802	-4.68063	2.85996e-06	8.87503e-06	amino-acid acetyltransferase, mitochondrial
CNAG_07710	96.2594	-0.691086	0.619388	0.210845	-3.2777	0.00104656	0.00229199	hypothetical protein
CNAG_06652	69.4222	-0.690799	0.61951	0.229444	-3.01076	0.00260599	0.00530823	allantoate permease
CNAG_04523	214.974	-0.69061	0.619592	0.136045	-5.07634	3.84775e-07	1.30401e-06	glyceraldehyde-3-phosphate dehydrogenase, type I
CNAG_01052	93955.2	-0.690414	0.619676	0.0267991	-25.7626	2.32756e-146	5.75252e-144	hypothetical protein
CNAG_05993	5808.21	-0.688434	0.620527	0.0423878	-16.2413	2.57289e-59	1.10767e-57	transmembrane transporter Liz1p, variant
CNAG_01735	9695.39	-0.68744	0.620955	0.0407552	-16.8676	7.79545e-64	3.91121e-62	hypothetical protein
CNAG_07586	78.7747	-0.687328	0.621003	0.220722	-3.114	0.00184572	0.00386338	hypothetical protein
CNAG_00609	384.033	-0.687095	0.621103	0.0996409	-6.89571	5.35946e-12	2.8429e-11	hypothetical protein
CNAG_05994	27161.4	-0.686592	0.62132	0.0298286	-23.0179	3.08256e-117	5.27435e-115	multidrug transporter
CNAG_04853	656.416	-0.685795	0.621663	0.085351	-8.035	9.35809e-16	6.44443e-15	derlin-2/3
CNAG_04730	2263.14	-0.68443	0.622251	0.0527066	-12.9857	1.47521e-38	3.02896e-37	hypothetical protein
CNAG_04565	863.545	-0.683213	0.622777	0.0729545	-9.36491	7.61124e-21	7.06395e-20	hypothetical protein
CNAG_04974	686.324	-0.682925	0.622901	0.0784339	-8.70701	3.11982e-18	2.46082e-17	hypothetical protein
CNAG_01109	359.461	-0.682346	0.623151	0.102988	-6.6255	3.46084e-11	1.70311e-10	hypothetical protein
CNAG_07334	1943.65	-0.682066	0.623272	0.0505345	-13.497	1.62814e-41	3.70805e-40	ferric-chelate reductase
CNAG_01357	374.271	-0.679657	0.624314	0.10126	-6.71199	1.91985e-11	9.61798e-11	hypothetical protein
CNAG_06620	1656.08	-0.677642	0.625186	0.0591147	-11.4632	2.0196e-30	3.05597e-29	mitochondrial Rho GTPase 1
CNAG_07540	4927.84	-0.677442	0.625273	0.0404783	-16.7359	7.17264e-63	3.46833e-61	hypothetical protein
CNAG_01424	788.456	-0.676642	0.62562	0.0758887	-8.91624	4.82389e-19	3.99873e-18	hypothetical protein
CNAG_06985	315.807	-0.676307	0.625765	0.115177	-5.87187	4.30903e-09	1.77714e-08	beta-glucosidase
CNAG_01147	668.045	-0.675645	0.626052	0.0789387	-8.5591	1.13748e-17	8.63527e-17	ARP2/3 complex 20 kDa subunit
CNAG_06501	3432.62	-0.675248	0.626225	0.0480867	-14.0423	8.58636e-45	2.30108e-43	1,3-beta-glucanosyltransferase
CNAG_04518	123.965	-0.675094	0.626291	0.190646	-3.54108	0.000398487	0.00093895	hypothetical protein
CNAG_06570	83.7115	-0.673113	0.627152	0.210883	-3.19188	0.00141351	0.00302804	hypothetical protein
CNAG_07967	159.431	-0.671258	0.627959	0.170248	-3.94283	8.05268e-05	0.000209445	hypothetical protein
CNAG_01817	70.5566	-0.669477	0.628734	0.233563	-2.86636	0.00415215	0.00819986	signal recognition particle receptor subunit alpha
CNAG_00249	1867.7	-0.66902	0.628934	0.0544309	-12.2912	1.01025e-34	1.8122e-33	hypothetical protein
CNAG_06610	101.528	-0.66881	0.629025	0.193567	-3.45518	0.000549925	0.00126409	MFS transporter
CNAG_02552	1515.18	-0.66881	0.629025	0.0588399	-11.3666	6.13237e-30	9.07345e-29	transketolase
CNAG_07342	429.911	-0.668727	0.629061	0.0973359	-6.87031	6.40641e-12	3.35031e-11	cytoplasmic protein
CNAG_06640	17049.9	-0.667025	0.629804	0.0302798	-22.0287	1.52918e-107	2.17111e-105	cathepsin A (carboxypeptidase C)
CNAG_01793	215.263	-0.666317	0.630113	0.133037	-5.0085	5.48547e-07	1.82931e-06	hypothetical protein
CNAG_04215	2398.61	-0.663844	0.631194	0.0527156	-12.5929	2.30931e-36	4.46668e-35	sulfate adenylyltransferase
CNAG_04819	225.431	-0.663755	0.631233	0.135636	-4.89364	9.89897e-07	3.21127e-06	hypothetical protein
CNAG_01360	4685.54	-0.662831	0.631637	0.0379415	-17.4699	2.4313e-68	1.39863e-66	pumilio domain-containing protein c
CNAG_06455	985.174	-0.661752	0.63211	0.069694	-9.49511	2.19979e-21	2.11516e-20	hypothetical protein
CNAG_04283	3921.26	-0.661567	0.632191	0.0538884	-12.2766	1.20941e-34	2.15982e-33	integral membrane protein
CNAG_03832	3619.13	-0.6609	0.632484	0.044018	-15.0143	5.91816e-51	1.98452e-49	alpha 1,2-mannosyltransferase
CNAG_07947	52.7425	-0.659722	0.633	0.278233	-2.37111	0.0177346	0.0310285	hypothetical protein
CNAG_05352	3699.88	-0.657805	0.633842	0.0496576	-13.2468	4.7073e-40	1.02653e-38	acetyl-CoA transporter
CNAG_00875	722.929	-0.657716	0.633881	0.079012	-8.32426	8.48547e-17	6.20192e-16	rab family protein
CNAG_07562	212.166	-0.657672	0.633901	0.138116	-4.76174	1.91935e-06	6.08158e-06	hypothetical protein
CNAG_01014	4384.81	-0.657367	0.634034	0.0389687	-16.8691	7.59406e-64	3.83903e-62	hypothetical protein
CNAG_01529	474.991	-0.657047	0.634175	0.0944271	-6.95825	3.44519e-12	1.84657e-11	solute carrier family 25 (mitochondrial phosphatetransporter), member 23/24/25/41
CNAG_03330	113.07	-0.655996	0.634637	0.184102	-3.56321	0.000366341	0.000869963	RecQ-mediated genome instability protein 1
CNAG_05336	1500.65	-0.6555	0.634856	0.0582328	-11.2565	2.15049e-29	3.08607e-28	glucose transporter, variant 2
CNAG_04895	393.121	-0.654999	0.635076	0.100734	-6.50229	7.91076e-11	3.81144e-10	nuclear protein
CNAG_03174	217.325	-0.65486	0.635137	0.138565	-4.72601	2.28972e-06	7.18349e-06	4'-phosphopantetheinyl transferase
CNAG_02396	377.864	-0.654772	0.635176	0.104681	-6.25493	3.97688e-10	1.81393e-09	hypothetical protein
CNAG_07359	3435.34	-0.654564	0.635267	0.0433215	-15.1094	1.40326e-51	4.8518e-50	Atypical/ABC1/ABC1-C protein kinase
CNAG_02261	1045.79	-0.654398	0.635341	0.0655751	-9.97936	1.87669e-23	1.97526e-22	hypothetical protein
CNAG_07029	1548.68	-0.653534	0.635721	0.0569887	-11.4678	1.91514e-30	2.90449e-29	vesicle-associated membrane protein 7
CNAG_03604	889.463	-0.652963	0.635973	0.0733019	-8.90787	5.20245e-19	4.30185e-18	mRNA 3'-end-processing protein YTH1
CNAG_00147	5904.75	-0.652015	0.636391	0.0400677	-16.2728	1.53923e-59	6.66965e-58	pre-mRNA-processing-splicing factor 8
CNAG_06797	355.651	-0.651588	0.636579	0.114242	-5.70357	1.17323e-08	4.66566e-08	lysine-specific demethylase 3
CNAG_00458	1294.33	-0.651454	0.636638	0.0584739	-11.1409	7.92913e-29	1.11863e-27	hypothetical protein
CNAG_01853	365.771	-0.651254	0.636727	0.108119	-6.02352	1.70666e-09	7.31913e-09	splicing factor 3B subunit 5
CNAG_02340	415.829	-0.650409	0.6371	0.106472	-6.10874	1.00422e-09	4.40866e-09	hypothetical protein
CNAG_00399	884.543	-0.650036	0.637264	0.0740815	-8.77461	1.71498e-18	1.38214e-17	transformer-2-beta isoform 3
CNAG_06265	186.096	-0.64875	0.637833	0.149026	-4.35328	1.34118e-05	3.84389e-05	high-affinity nicotinic acid transporter
CNAG_06453	46200	-0.648006	0.638162	0.0286463	-22.6209	2.69803e-113	4.28666e-111	benzodiazapine receptor
CNAG_06085	7006.58	-0.646804	0.638694	0.0422579	-15.3061	6.96164e-53	2.45794e-51	phospholipase B
CNAG_07995	5427.12	-0.646568	0.638798	0.0373517	-17.3103	3.93377e-67	2.16942e-65	hypothetical protein
CNAG_04991	3276.86	-0.646374	0.638884	0.058281	-11.0907	1.39264e-28	1.93203e-27	hypothetical protein
CNAG_03135	108.582	-0.645353	0.639336	0.195666	-3.29824	0.000972944	0.00214513	hypothetical protein
CNAG_05535	163.456	-0.644765	0.639597	0.153448	-4.20186	2.64729e-05	7.33612e-05	hypothetical protein
CNAG_02200	757.282	-0.643678	0.640079	0.0826022	-7.7925	6.56953e-15	4.27693e-14	hypothetical protein
CNAG_01768	1521.83	-0.643002	0.640379	0.0570667	-11.2676	1.8977e-29	2.73506e-28	hypothetical protein
CNAG_00575	30496.3	-0.642905	0.640422	0.0288419	-22.2907	4.54979e-110	6.90017e-108	catalase
CNAG_00503	1209.1	-0.641958	0.640843	0.0610476	-10.5157	7.31359e-26	8.69939e-25	hypothetical protein
CNAG_00082	663.637	-0.641314	0.641129	0.080704	-7.94649	1.91868e-15	1.29197e-14	cytosolic Fe-S cluster assembly factor CFD1
CNAG_05824	552.031	-0.640706	0.641399	0.0905412	-7.0764	1.47946e-12	8.15232e-12	WD-repeat protein 68
CNAG_01848	2905.27	-0.640681	0.64141	0.0464314	-13.7984	2.60458e-43	6.4611e-42	hypothetical protein
CNAG_04719	340.731	-0.640517	0.641483	0.1095	-5.84948	4.93099e-09	2.01868e-08	solute carrier family 41
CNAG_01802	2995.86	-0.640172	0.641637	0.0487016	-13.1448	1.82367e-39	3.92559e-38	Fe-S cluster assembly protein DRE2
CNAG_06300	3007.54	-0.639871	0.64177	0.0433581	-14.7578	2.74008e-49	8.7486e-48	glutamate-cysteine ligase catalytic subunit
CNAG_05591	96.523	-0.639271	0.642037	0.200944	-3.18134	0.00146594	0.00313131	hypothetical protein
CNAG_03709	263.465	-0.638682	0.642299	0.120618	-5.29508	1.18964e-07	4.22707e-07	hypothetical protein
CNAG_00796	1637.27	-0.638663	0.642308	0.05718	-11.1694	5.75971e-29	8.14292e-28	ATP-binding cassette, subfamily B (MDR/TAP), member1
CNAG_03909	421.571	-0.638091	0.642563	0.0953821	-6.68984	2.2342e-11	1.11509e-10	hypothetical protein
CNAG_01563	608.605	-0.63711	0.643	0.0873774	-7.29147	3.06581e-13	1.77127e-12	histone deacetylase 6/10
CNAG_00760	720.975	-0.636088	0.643456	0.0795307	-7.99801	1.26446e-15	8.62754e-15	methylenetetrahydrofolate reductase
CNAG_03722	2841.49	-0.634451	0.644186	0.0481684	-13.1715	1.27987e-39	2.78137e-38	RAN protein binding protein
CNAG_00106	720.586	-0.633366	0.64467	0.0757273	-8.36378	6.07396e-17	4.45892e-16	two-component system sensor protein
CNAG_06762	1057.42	-0.632636	0.644997	0.0663523	-9.5345	1.50605e-21	1.46073e-20	hypothetical protein
CNAG_06943	63.9327	-0.632553	0.645034	0.248748	-2.54295	0.0109921	0.0200575	hypothetical protein
CNAG_00246	1465.84	-0.632268	0.645161	0.0580084	-10.8996	1.15774e-27	1.5268e-26	hypothetical protein
CNAG_06614	1648.25	-0.6319	0.645326	0.0596095	-10.6007	2.95891e-26	3.58996e-25	glycerophosphodiesterase
CNAG_03840	821.187	-0.631586	0.645466	0.0718277	-8.79307	1.45525e-18	1.17708e-17	pre-mRNA-splicing factor CWC26
CNAG_05521	13010.8	-0.631504	0.645503	0.036642	-17.2344	1.46452e-66	8.01043e-65	aldose reductase
CNAG_04944	4049.77	-0.631116	0.645677	0.0510552	-12.3614	4.22507e-35	7.70325e-34	hypothetical protein
CNAG_04741	6427.27	-0.629168	0.646549	0.0358595	-17.5454	6.45354e-69	3.81102e-67	endosome protein
CNAG_01524	744.386	-0.625594	0.648153	0.0772062	-8.10289	5.36681e-16	3.75396e-15	hypothetical protein
CNAG_04943	3128.19	-0.625331	0.648271	0.0440286	-14.2028	8.79646e-46	2.45602e-44	CBS domain-containing protein, variant
CNAG_05447	207.315	-0.625147	0.648354	0.132965	-4.70158	2.58152e-06	8.04975e-06	elongin-A
CNAG_00843	316.486	-0.62404	0.648851	0.11804	-5.28667	1.24563e-07	4.41454e-07	salicylate hydroxylase
CNAG_05937	1153.06	-0.623291	0.649188	0.0618407	-10.079	6.84379e-24	7.42579e-23	hypothetical protein
CNAG_02934	1056.18	-0.623067	0.649289	0.0740152	-8.41809	3.82656e-17	2.83718e-16	hypothetical protein, variant
CNAG_04871	129.024	-0.622583	0.649507	0.170774	-3.64565	0.00026672	0.000647208	hypothetical protein
CNAG_05714	1415.37	-0.621869	0.649829	0.0580578	-10.7112	9.01828e-27	1.13331e-25	hypothetical protein
CNAG_05636	194.637	-0.621747	0.649884	0.14187	-4.3825	1.17322e-05	3.39355e-05	hypothetical protein
CNAG_07472	134.578	-0.621631	0.649936	0.189907	-3.27334	0.00106283	0.00232228	hypothetical protein
CNAG_07780	738.755	-0.621209	0.650126	0.0776412	-8.00103	1.23387e-15	8.44471e-15	geranylgeranyl diphosphate synthase, type III
CNAG_01073	208.457	-0.62059	0.650405	0.144221	-4.30305	1.68462e-05	4.7613e-05	hypothetical protein, variant
CNAG_03488	127.224	-0.619513	0.65089	0.175039	-3.5393	0.000401193	0.000944991	hypothetical protein
CNAG_04585	1734.48	-0.616309	0.652338	0.135115	-4.56135	5.08255e-06	1.52912e-05	hypothetical protein
CNAG_03154	1120.01	-0.616239	0.652369	0.0658782	-9.35422	8.42204e-21	7.79477e-20	hypothetical protein
CNAG_02550	607.945	-0.615891	0.652527	0.0875684	-7.03326	2.01769e-12	1.10181e-11	hypothetical protein
CNAG_04171	2769.04	-0.615356	0.652769	0.048234	-12.7577	2.82358e-37	5.59102e-36	hypothetical protein
CNAG_02716	1471.13	-0.612737	0.653955	0.0610059	-10.0439	9.77339e-24	1.0536e-22	hypothetical protein
CNAG_02606	913.371	-0.612016	0.654282	0.0740318	-8.26693	1.37448e-16	9.91555e-16	hypothetical protein
CNAG_04289	1200.61	-0.611914	0.654328	0.0614024	-9.96564	2.15491e-23	2.25741e-22	hypothetical protein
CNAG_06195	1032.83	-0.6117	0.654425	0.0721578	-8.47725	2.30583e-17	1.72691e-16	hypothetical protein
CNAG_04842	373.097	-0.611354	0.654582	0.10728	-5.6987	1.20727e-08	4.78962e-08	hypothetical protein
CNAG_05197	271.838	-0.611092	0.654701	0.119737	-5.1036	3.33247e-07	1.13689e-06	NADH dehydrogenase (ubiquinone) 1 alpha subcomplex8
CNAG_05508	122.953	-0.610567	0.654939	0.173037	-3.52853	0.000417881	0.000982219	hypothetical protein
CNAG_02527	18339.3	-0.61036	0.655033	0.036857	-16.5602	1.35135e-61	6.219e-60	multidrug transporter
CNAG_02030	26543.2	-0.61032	0.655051	0.0332582	-18.351	3.24099e-75	2.40301e-73	glyoxal oxidase
CNAG_07415	330.788	-0.610101	0.655151	0.111308	-5.48119	4.22474e-08	1.5732e-07	hypothetical protein
CNAG_05439	140.542	-0.609711	0.655328	0.162953	-3.74164	0.000182825	0.000452518	CAMK/CAMK1/CAMK1-CMK protein kinase
CNAG_04816	5237.66	-0.609546	0.655403	0.0395113	-15.4271	1.07538e-53	3.94285e-52	hypothetical protein
CNAG_04269	2704.18	-0.609379	0.655479	0.0451041	-13.5105	1.3561e-41	3.1097e-40	leucyl aminopeptidase
CNAG_02978	403.086	-0.609141	0.655587	0.0999037	-6.09728	1.07886e-09	4.7146e-09	hypothetical protein
CNAG_05277	1295.85	-0.608911	0.655692	0.0750368	-8.11483	4.86468e-16	3.41346e-15	vesicle-associated membrane protein 4
CNAG_04233	186.227	-0.608537	0.655861	0.148298	-4.10349	4.06972e-05	0.000110216	hypothetical protein
CNAG_06678	324.126	-0.608117	0.656052	0.115167	-5.28033	1.28953e-07	4.56502e-07	enzyme activator
CNAG_00645	329.19	-0.607801	0.656196	0.109408	-5.55535	2.77053e-08	1.05283e-07	2,5-diamino-6-(ribosylamino)-4(3H)-pyrimidinone 5'-phosphate reductase
CNAG_03619	208.556	-0.607367	0.656394	0.137544	-4.4158	1.00636e-05	2.92867e-05	solute carrier family 29 (equilibrative nucleosidetransporter), member 1/2/3
CNAG_04402	713.893	-0.607294	0.656427	0.0806347	-7.53142	5.01904e-14	3.06143e-13	splicing factor U2AF 35 kDa subunit
CNAG_04907	98.4804	-0.607251	0.656446	0.211173	-2.87561	0.00403244	0.00799421	hypothetical protein, variant
CNAG_06034	481.507	-0.606716	0.65669	0.0947995	-6.39999	1.55391e-10	7.27157e-10	allantoin permease
CNAG_07719	3737.35	-0.606129	0.656957	0.0460189	-13.1713	1.28377e-39	2.78137e-38	26S protease regulatory subunit 7
CNAG_01880	299.289	-0.605034	0.657456	0.120073	-5.03887	4.68293e-07	1.57268e-06	hypothetical protein
CNAG_07559	12734.3	-0.603462	0.658173	0.0343414	-17.5724	4.00622e-69	2.40843e-67	glucose-6-phosphate 1-epimerase
CNAG_00290	802.383	-0.602827	0.658462	0.0775321	-7.77519	7.53345e-15	4.87592e-14	aminopeptidase
CNAG_04989	899.173	-0.602528	0.658599	0.0764106	-7.8854	3.1354e-15	2.08391e-14	protein FRG1
CNAG_00048	53.4563	-0.600862	0.65936	0.258164	-2.32744	0.0199416	0.0345458	sugar transporter
CNAG_06703	243.509	-0.5999	0.6598	0.130334	-4.6028	4.16857e-06	1.27192e-05	hypothetical protein
CNAG_02319	89.4874	-0.599376	0.660039	0.20061	-2.98777	0.00281023	0.00568951	hypothetical protein
CNAG_03233	98.5959	-0.598998	0.660212	0.195653	-3.06153	0.00220209	0.00455363	hypothetical protein
CNAG_00782	208.006	-0.598457	0.66046	0.136848	-4.37315	1.22467e-05	3.53318e-05	STE/STE20/Fray protein kinase
CNAG_01476	845.291	-0.597917	0.660707	0.0752953	-7.94095	2.00631e-15	1.34961e-14	hypothetical protein
CNAG_04617	314.731	-0.597851	0.660737	0.113112	-5.2855	1.25365e-07	4.44035e-07	OPT family small oligopeptide transporter
CNAG_06577	12080.8	-0.597548	0.660876	0.0375687	-15.9055	5.80521e-57	2.37658e-55	hypothetical protein
CNAG_07716	1733.32	-0.596987	0.661133	0.0595288	-10.0285	1.14198e-23	1.22515e-22	hypothetical protein
CNAG_01577	9253.96	-0.596476	0.661367	0.038565	-15.4668	5.81324e-54	2.19162e-52	glutamate dehydrogenase (NADP )
CNAG_02942	6325.63	-0.596334	0.661433	0.0432285	-13.7949	2.7338e-43	6.7316e-42	hypothetical protein
CNAG_00652	1045.12	-0.595087	0.662005	0.0671643	-8.86017	7.9896e-19	6.55776e-18	hypothetical protein, variant 2
CNAG_05457	6408.02	-0.594776	0.662147	0.0381539	-15.5888	8.66836e-55	3.34358e-53	pentatricopeptide repeat protein
CNAG_05574	269.65	-0.594734	0.662166	0.133278	-4.46234	8.10682e-06	2.38522e-05	phosphatidylinositol glycan, class C
CNAG_03244	1030.51	-0.594071	0.662471	0.0670831	-8.85575	8.3125e-19	6.79771e-18	hypothetical protein
CNAG_06782	1774.77	-0.59372	0.662632	0.0551598	-10.7636	5.11189e-27	6.4985e-26	hypothetical protein
CNAG_03930	162.643	-0.593377	0.662789	0.154985	-3.82861	0.000128869	0.000326108	hypothetical protein
CNAG_05250	3782.64	-0.593343	0.662805	0.0414639	-14.3099	1.89898e-46	5.46203e-45	telomere maintenance protein
CNAG_01920	30640.2	-0.593262	0.662842	0.0387244	-15.3201	5.61282e-53	1.99225e-51	polyubiquitin
CNAG_01787	137.681	-0.59251	0.663188	0.166571	-3.55709	0.000374979	0.000888262	hypothetical protein
CNAG_02318	726.118	-0.592269	0.663299	0.0769581	-7.69599	1.40403e-14	8.91446e-14	hypothetical protein
CNAG_07442	5229.67	-0.591393	0.663702	0.0452948	-13.0565	5.83207e-39	1.22382e-37	phosphatidylglycerol/phosphatidylinositol transferprotein
CNAG_04538	1169.46	-0.591354	0.66372	0.0630389	-9.38078	6.54857e-21	6.11169e-20	ubiquitin-like modifier-activating enzyme ATG7
CNAG_04570	1346.19	-0.590874	0.66394	0.0594504	-9.93894	2.81798e-23	2.9474e-22	hypothetical protein
CNAG_05914	997.757	-0.59072	0.664012	0.0668756	-8.83312	1.01798e-18	8.28413e-18	MFS transporter, SP family, general alphaglucoside:H symporter
CNAG_01946	714.849	-0.589864	0.664405	0.083071	-7.10073	1.241e-12	6.8838e-12	allantoate permease
CNAG_04558	144.995	-0.589853	0.664411	0.164821	-3.57876	0.000345231	0.000824822	hypothetical protein
CNAG_02313	1105.74	-0.589536	0.664557	0.0699173	-8.4319	3.40105e-17	2.5245e-16	hypothetical protein
CNAG_00355	1597.84	-0.588803	0.664895	0.0542957	-10.8444	2.12071e-27	2.75321e-26	hypothetical protein
CNAG_00507	56.1365	-0.588534	0.665018	0.256996	-2.29005	0.0220184	0.0379367	nitrilase
CNAG_01643	521.559	-0.588476	0.665045	0.0880223	-6.68553	2.30096e-11	1.14584e-10	hypothetical protein
CNAG_06749	170.471	-0.587025	0.665714	0.149686	-3.9217	8.79265e-05	0.000228123	hypothetical protein
CNAG_05343	461.102	-0.586891	0.665776	0.0920345	-6.37686	1.80756e-10	8.41133e-10	hypothetical protein
CNAG_03939	3331.73	-0.586174	0.666107	0.0431102	-13.5971	4.16588e-42	9.68604e-41	5-aminolevulinic acid synthase
CNAG_04358	1120.68	0.585487	1.50055	0.0629586	9.29956	1.4103e-20	1.29627e-19	iron-sulfur clusters transporter ATM1,mitochondrial, variant
CNAG_02294	1206.66	0.585602	1.50067	0.0620389	9.43927	3.7538e-21	3.56317e-20	phosphoribosylaminoimidazole carboxylase
CNAG_05606	110.179	0.586268	1.50136	0.210042	2.79119	0.00525149	0.0101516	ATP-dependent DNA helicase PIF1
CNAG_02825	1777.36	0.587013	1.50213	0.0553251	10.6102	2.67069e-26	3.24618e-25	argininosuccinate lyase
CNAG_06566	1439.63	0.587258	1.50239	0.0578472	10.1519	3.25018e-24	3.56718e-23	hypothetical protein
CNAG_05655	85.0841	0.588913	1.50411	0.242711	2.4264	0.0152496	0.0270138	EF-hand calcium-binding protein
CNAG_05016	92.1603	0.589449	1.50467	0.205204	2.87251	0.00407227	0.00806358	hypothetical protein
CNAG_07883	304.146	0.590503	1.50577	0.111382	5.30158	1.14804e-07	4.08144e-07	hypothetical protein
CNAG_01928	968.903	0.590974	1.50626	0.0677921	8.71745	2.84548e-18	2.25241e-17	xaa-Pro aminopeptidase
CNAG_04968	259.654	0.593112	1.5085	0.129453	4.58169	4.61234e-06	1.39457e-05	hypothetical protein, variant
CNAG_06935	2281.63	0.593428	1.50883	0.0493201	12.0322	2.40732e-33	4.05658e-32	isochorismatase hydrolase
CNAG_05402	809.945	0.594901	1.51037	0.0714767	8.32299	8.57687e-17	6.26187e-16	protein CMS1
CNAG_01062	1818.42	0.596682	1.51224	0.0549322	10.8622	1.74556e-27	2.27948e-26	CAMK/CAMKL/PASK protein kinase
CNAG_06758	146.478	0.596942	1.51251	0.158258	3.77195	0.000161978	0.000404219	efflux protein
CNAG_00449	353.529	0.597867	1.51348	0.107098	5.58243	2.37179e-08	9.08552e-08	RNA-binding protein NOB1
CNAG_02850	7416.13	0.598491	1.51413	0.0419783	14.2572	4.04635e-46	1.1393e-44	glucan endo-1,3-alpha-glucosidase agn1
CNAG_04094	267.75	0.59932	1.515	0.128451	4.66575	3.075e-06	9.50417e-06	hypothetical protein
CNAG_05661	119.102	0.600162	1.51589	0.190456	3.15119	0.00162609	0.00344474	FACT complex subunit POB3
CNAG_02705	64.542	0.600271	1.516	0.245745	2.44266	0.0145795	0.0259576	hypothetical protein, variant 1
CNAG_02525	94.7366	0.601842	1.51765	0.203235	2.96131	0.00306331	0.00617567	hypothetical protein
CNAG_02888	250.88	0.602507	1.51835	0.131086	4.59627	4.30123e-06	1.30761e-05	gamma-glutamyltransferase
CNAG_04132	1428.82	0.603351	1.51924	0.0579155	10.4178	2.05703e-25	2.39556e-24	pre-mRNA-splicing factor CWC2
CNAG_06051	806.009	0.604054	1.51998	0.0878558	6.87551	6.17685e-12	3.24297e-11	galactokinase
CNAG_07951	63.0079	0.604518	1.52047	0.249806	2.41994	0.0155229	0.0274541	WD-repeat protein JIP5
CNAG_04983	521.376	0.604653	1.52061	0.0858633	7.04204	1.89446e-12	1.03706e-11	hypothetical protein
CNAG_03820	481.986	0.605374	1.52137	0.09935	6.09335	1.10573e-09	4.81944e-09	nucleolar protein 14
CNAG_00975	71.7365	0.606123	1.52216	0.237707	2.54987	0.0107763	0.0196906	hypothetical protein
CNAG_02851	402.717	0.607403	1.52351	0.110332	5.50525	3.68653e-08	1.38359e-07	threonine aldolase
CNAG_05769	188.651	0.609253	1.52547	0.142416	4.27798	1.88597e-05	5.30344e-05	cytoplasmic protein
CNAG_07502	1219.08	0.610004	1.52626	0.0610868	9.98586	1.75767e-23	1.85584e-22	CTP synthase
CNAG_00628	305.487	0.610355	1.52663	0.124769	4.89189	9.98731e-07	3.23835e-06	hypothetical protein
CNAG_07304	175.924	0.610496	1.52678	0.162312	3.76125	0.000169065	0.000420331	hypothetical protein
CNAG_00506	99.311	0.61107	1.52739	0.196145	3.1154	0.00183697	0.0038487	hypothetical protein
CNAG_01428	7204.8	0.611421	1.52776	0.0382148	15.9996	1.28668e-57	5.39999e-56	translation initiation factor 5A
CNAG_06545	497.24	0.611765	1.52813	0.0980276	6.24074	4.35495e-10	1.98095e-09	pim1 protein RNA transporter 2
CNAG_05602	6028.37	0.612771	1.52919	0.0365017	16.7874	3.01541e-63	1.46874e-61	1-pyrroline-5-carboxylate dehydrogenase
CNAG_01332	3683.66	0.612978	1.52941	0.0437347	14.0158	1.24741e-44	3.30316e-43	small subunit ribosomal protein S24e
CNAG_02785	1015.61	0.613511	1.52998	0.0718815	8.53503	1.40125e-17	1.05656e-16	hypothetical protein
CNAG_05802	54.9764	0.614302	1.53082	0.268034	2.29188	0.0219124	0.0377637	D-aspartate oxidase
CNAG_01017	664.113	0.615228	1.5318	0.0785354	7.83378	4.73434e-15	3.10337e-14	E3 ubiquitin-protein ligase SHPRH
CNAG_00059	81.2169	0.615418	1.532	0.22056	2.79026	0.00526665	0.0101779	hypothetical protein
CNAG_04451	322.546	0.615751	1.53236	0.109576	5.6194	1.9162e-08	7.40833e-08	ribonuclease P/MRP protein subunit POP1
CNAG_05566	257.328	0.616203	1.53284	0.124402	4.95334	7.29511e-07	2.40752e-06	hypothetical protein
CNAG_00484	1054.86	0.616523	1.53318	0.0640778	9.62147	6.48993e-22	6.40641e-21	2-oxoisovalerate dehydrogenase E2 component(dihydrolipoyl transacylase)
CNAG_06697	113.352	0.618977	1.53579	0.181215	3.41571	0.000636166	0.00144049	TTK protein kinase, variant
CNAG_01953	60.3906	0.619026	1.53584	0.245726	2.51917	0.0117633	0.0213479	hypothetical protein
CNAG_06318	791.397	0.61914	1.53596	0.074532	8.30704	9.81213e-17	7.14807e-16	ribosome biogenesis protein YTM1
CNAG_02090	363.221	0.619435	1.53627	0.10564	5.86362	4.5288e-09	1.85973e-08	guanine nucleotide-binding protein G(o) subunitalpha
CNAG_01635	1234.95	0.619867	1.53673	0.0596511	10.3915	2.70944e-25	3.13891e-24	hypothetical protein
CNAG_01364	1327.69	0.620165	1.53705	0.0621129	9.98448	1.78231e-23	1.87889e-22	guanylate kinase
CNAG_06118	605.878	0.620383	1.53728	0.0903823	6.86399	6.69631e-12	3.49918e-11	hypothetical protein
CNAG_02418	4435.32	0.620542	1.53745	0.0481373	12.8911	5.05176e-38	1.01537e-36	asparagine-tRNA ligase
CNAG_05854	222.447	0.620665	1.53758	0.133275	4.65703	3.20807e-06	9.90169e-06	hypothetical protein
CNAG_00490	2107.33	0.620711	1.53763	0.11937	5.1999	1.99397e-07	6.96271e-07	acetyl-CoA acyltransferase
CNAG_00397	189.918	0.62114	1.53809	0.153395	4.04929	5.13733e-05	0.000137621	2-oxoisovalerate dehydrogenase E1 component, betasubunit
CNAG_00334	16163.7	0.621401	1.53837	0.0391995	15.8523	1.35552e-56	5.44902e-55	hsp75-like protein
CNAG_06148	523.465	0.62249	1.53953	0.090795	6.856	7.08164e-12	3.69186e-11	hypothetical protein
CNAG_04761	132.224	0.622907	1.53998	0.168248	3.70231	0.000213647	0.000524141	Ras family protein
CNAG_06235	83.2655	0.623616	1.54073	0.221123	2.82023	0.00479898	0.00933684	hypothetical protein
CNAG_00047	1358.4	0.623803	1.54093	0.165754	3.76343	0.0001676	0.000417312	pyruvate dehydrogenase kinase
CNAG_06871	1520.17	0.624038	1.54118	0.0605198	10.3113	6.26566e-25	7.15937e-24	hypothetical protein
CNAG_07622	682.208	0.624169	1.54132	0.0774697	8.05694	7.82273e-16	5.41678e-15	COP9 signalosome complex subunit 1
CNAG_04650	396.045	0.62426	1.54142	0.108463	5.75552	8.63762e-09	3.46595e-08	actin-like protein ARP6
CNAG_04360	274.999	0.624707	1.5419	0.118319	5.27984	1.29294e-07	4.57463e-07	tRNA (guanine37-N1)-methyltransferase
CNAG_00335	1030.24	0.624754	1.54195	0.0654465	9.54602	1.3478e-21	1.30915e-20	hypothetical protein
CNAG_00258	265.685	0.625016	1.54223	0.120202	5.1997	1.99615e-07	6.9667e-07	hypothetical protein
CNAG_05161	289.579	0.625286	1.54252	0.126517	4.94231	7.72036e-07	2.53658e-06	hypothetical protein, variant
CNAG_04052	119.807	0.625776	1.54304	0.174915	3.57761	0.000346756	0.000828169	minichromosome maintenance protein 5 (cell divisioncontrol protein 46)
CNAG_01058	492.043	0.625886	1.54316	0.0908911	6.88612	5.73366e-12	3.03416e-11	nitric oxide synthase-interacting protein
CNAG_00699	385.095	0.628112	1.54554	0.105884	5.93206	2.99153e-09	1.25629e-08	transmembrane receptor
CNAG_07486	175.4	0.629344	1.54686	0.14903	4.22294	2.4114e-05	6.7131e-05	hypothetical protein
CNAG_02215	116.546	0.630129	1.5477	0.182432	3.45405	0.00055224	0.00126679	transcriptional activator, variant
CNAG_06936	354.955	0.630504	1.54811	0.107427	5.86913	4.38096e-09	1.80346e-08	beta-glucosidase
CNAG_04791	215.574	0.630872	1.5485	0.145561	4.33406	1.46382e-05	4.17439e-05	hypothetical protein
CNAG_03679	952.553	0.631029	1.54867	0.0712162	8.86076	7.94699e-19	6.53082e-18	hypothetical protein, variant
CNAG_02509	107.965	0.63207	1.54979	0.201603	3.13522	0.00171727	0.00362023	hypothetical protein
CNAG_02854	467.375	0.633423	1.55124	0.0938295	6.75079	1.47046e-11	7.44489e-11	peroxiredoxin Q/BCP
CNAG_04648	270.238	0.634628	1.55254	0.129581	4.89753	9.70488e-07	3.15096e-06	sister chromatid cohesion protein PDS5
CNAG_07458	133.058	0.635221	1.55318	0.171359	3.70697	0.000209757	0.000515166	hypothetical protein
CNAG_07387	71.5457	0.637516	1.55565	0.247284	2.57807	0.00993538	0.0182641	siderophore-iron transporter Str3
CNAG_00300	1502.15	0.638011	1.55618	0.056272	11.338	8.50739e-30	1.24769e-28	gamma-tubulin complex component 2
CNAG_01096	215.191	0.638446	1.55665	0.131517	4.85449	1.20697e-06	3.89462e-06	hypothetical protein
CNAG_00280	3089.74	0.638521	1.55673	0.0458348	13.9309	4.1103e-44	1.05492e-42	complement component 1 Q subcomponent-bindingprotein, mitochondrial
CNAG_06540	154.73	0.638881	1.55712	0.15454	4.13408	3.56387e-05	9.69889e-05	dihydroxy-acid dehydratase
CNAG_04195	1088.97	0.639381	1.55766	0.0628155	10.1787	2.46774e-24	2.72636e-23	O-methyltransferase
CNAG_02296	1195.93	0.642522	1.56106	0.0653336	9.83448	7.99794e-23	8.21081e-22	ATP-binding protein
CNAG_00812	680.137	0.642831	1.56139	0.0800261	8.03277	9.52988e-16	6.55597e-15	cohesin complex subunit SA-1/2
CNAG_01776	734.188	0.643173	1.56176	0.0810254	7.93792	2.05594e-15	1.3816e-14	2,4-dihydroxyhept-2-ene-1,7-dioic acid aldolase
CNAG_04760	2282.69	0.645787	1.56459	0.0588193	10.9792	4.81382e-28	6.47633e-27	cytoplasmic protein
CNAG_02840	64.1497	0.645968	1.56479	0.240107	2.69033	0.0071381	0.0135166	hypothetical protein
CNAG_01755	213.255	0.646499	1.56537	0.136787	4.72633	2.28618e-06	7.17575e-06	hypothetical protein
CNAG_01144	801.352	0.647176	1.5661	0.0807613	8.01343	1.11551e-15	7.65036e-15	replication factor A1
CNAG_06596	113.649	0.648089	1.56709	0.179051	3.61958	0.000295084	0.000711379	hypothetical protein
CNAG_06353	614.672	0.648408	1.56744	0.0856413	7.57121	3.69756e-14	2.27619e-13	tRNA pseudouridine(38-40) synthase
CNAG_05789	164.339	0.648415	1.56745	0.168907	3.83889	0.000123593	0.000313825	hypothetical protein
CNAG_01213	827.783	0.648965	1.56804	0.0779481	8.3256	8.39031e-17	6.13909e-16	hypothetical protein
CNAG_00026	1217.08	0.650314	1.56951	0.0600664	10.8266	2.57552e-27	3.33717e-26	kynurenine aminotransferase
CNAG_04799	4884.83	0.650484	1.56969	0.0421447	15.4345	9.58983e-54	3.55516e-52	large subunit ribosomal protein L14e
CNAG_02096	495.613	0.650603	1.56982	0.0899569	7.23238	4.74597e-13	2.70683e-12	peroxin-16
CNAG_01172	301.64	0.650839	1.57008	0.120331	5.40875	6.34655e-08	2.31606e-07	hypothetical protein
CNAG_06599	430.443	0.651458	1.57075	0.0975202	6.68023	2.3856e-11	1.18622e-10	hypothetical protein
CNAG_06966	110.632	0.652343	1.57172	0.228832	2.85075	0.00436158	0.00855773	alkaline phosphatase D
CNAG_07350	834.417	0.652651	1.57205	0.0852562	7.65517	1.93052e-14	1.21189e-13	hypothetical protein
CNAG_00877	715.928	0.652708	1.57212	0.0796802	8.1916	2.57775e-16	1.84564e-15	adenylate kinase, variant
CNAG_03148	204.427	0.653097	1.57254	0.140625	4.64426	3.41305e-06	1.04859e-05	nuclear condensin complex protein
CNAG_00076	563.58	0.653686	1.57318	0.0908885	7.19217	6.37679e-13	3.60003e-12	A/G-specific adenine glycosylase
CNAG_06149	445.852	0.653997	1.57352	0.0982857	6.65404	2.85159e-11	1.41057e-10	hypothetical protein
CNAG_06008	294.117	0.653998	1.57352	0.118957	5.49778	3.84609e-08	1.44023e-07	asparaginase
CNAG_02687	485.357	0.654782	1.57438	0.0893687	7.32675	2.35803e-13	1.37185e-12	hypothetical protein
CNAG_06154	936.791	0.655628	1.5753	0.0703971	9.31328	1.23939e-20	1.14075e-19	cytoplasmic protein
CNAG_02317	49.0596	0.656626	1.57639	0.275306	2.38508	0.0170753	0.0299852	protein arginine N-methyltransferase 3
CNAG_04776	1487.55	0.658208	1.57812	0.0596544	11.0337	2.62885e-28	3.57278e-27	homoserine dehydrogenase
CNAG_06852	454.277	0.658415	1.57835	0.0983783	6.69268	2.19116e-11	1.09443e-10	transcriptional coactivator HFI1/ADA1
CNAG_03108	285.767	0.659633	1.57968	0.119414	5.52391	3.31535e-08	1.2492e-07	hypothetical protein
CNAG_00096	342.76	0.65996	1.58004	0.113088	5.83581	5.35285e-09	2.18335e-08	hypothetical protein
CNAG_05191	260.699	0.660141	1.58024	0.130532	5.05729	4.25245e-07	1.43705e-06	hypothetical protein
CNAG_01473	131.218	0.660967	1.58114	0.180777	3.65625	0.000255927	0.000622831	hypothetical protein
CNAG_06087	181.744	0.661092	1.58128	0.151839	4.35391	1.33728e-05	3.83649e-05	kinetochore protein Spc7/SPC105
CNAG_00599	788.981	0.661616	1.58185	0.0744114	8.89133	6.03839e-19	4.98074e-18	anion transporter
CNAG_03766	684.222	0.661695	1.58194	0.0851345	7.77235	7.70456e-15	4.98184e-14	ankyrin repeat-containing protein
CNAG_07409	886.085	0.662127	1.58241	0.071797	9.2222	2.91052e-20	2.62814e-19	DNA-directed RNA polymerase, mitochondrial
CNAG_01810	43.3637	0.663904	1.58436	0.292044	2.2733	0.0230082	0.0394993	DNA-directed RNA polymerase I subunit RPA12
CNAG_01256	169.98	0.66743	1.58824	0.14685	4.54497	5.49427e-06	1.64631e-05	hypothetical protein
CNAG_01564	800.414	0.668204	1.58909	0.0766281	8.72009	2.77987e-18	2.2031e-17	nucleolar protein 12
CNAG_05620	1038.3	0.669283	1.59028	0.0648489	10.3207	5.68339e-25	6.52759e-24	hypothetical protein
CNAG_01917	56.6305	0.669339	1.59034	0.264134	2.53409	0.0112741	0.0205271	ribonuclease P protein subunit POP4
CNAG_04553	65.2457	0.669627	1.59066	0.243442	2.75066	0.0059476	0.0113883	hypothetical protein
CNAG_03393	221.228	0.669753	1.5908	0.16067	4.1685	3.06613e-05	8.41988e-05	acyl-CoA thioesterase II
CNAG_02546	938.647	0.670145	1.59123	0.0709986	9.43885	3.76906e-21	3.57257e-20	transferase
CNAG_00085	144.823	0.67024	1.59134	0.164735	4.0686	4.72964e-05	0.00012721	histone chaperone ASF1
CNAG_03618	1036.47	0.671657	1.5929	0.0698636	9.61383	6.98994e-22	6.88979e-21	NADPH2:quinone reductase
CNAG_01248	653.93	0.672593	1.59394	0.0883017	7.61699	2.5966e-14	1.61785e-13	vacuole morphology and inheritance protein 14
CNAG_02939	801.865	0.673905	1.59539	0.0763878	8.82215	1.12278e-18	9.11472e-18	peroxin-3
CNAG_03917	1038.97	0.674596	1.59615	0.0659212	10.2334	1.40526e-24	1.58133e-23	nuclear pore complex protein Nup85
CNAG_06079	1640.06	0.675675	1.59734	0.0597644	11.3056	1.23066e-29	1.79305e-28	proliferating cell nuclear antigen (pcna)
CNAG_00835	333.632	0.67722	1.59906	0.144321	4.69245	2.69952e-06	8.39418e-06	hypothetical protein
CNAG_00433	142.914	0.677527	1.5994	0.166322	4.0736	4.62918e-05	0.000124659	hypothetical protein
CNAG_05815	64.8307	0.677934	1.59985	0.240992	2.8131	0.00490669	0.00952644	glucosidase
CNAG_02034	165.571	0.678416	1.60038	0.157748	4.30063	1.70316e-05	4.80762e-05	hypothetical protein
CNAG_03184	274.872	0.679028	1.60106	0.123718	5.48851	4.05348e-08	1.5128e-07	BUB protein kinase
CNAG_06215	307.327	0.681442	1.60374	0.111458	6.11388	9.72382e-10	4.27733e-09	hypothetical protein
CNAG_03567	1398.33	0.681545	1.60386	0.0579091	11.7692	5.62407e-32	9.08702e-31	AGC/NDR/NDR protein kinase
CNAG_07975	289.796	0.682076	1.60445	0.140745	4.84617	1.25869e-06	4.05368e-06	hypothetical protein
CNAG_07756	467.525	0.682423	1.60483	0.0971994	7.02085	2.20516e-12	1.19927e-11	cell division control protein
CNAG_03477	57.2347	0.682541	1.60496	0.266036	2.5656	0.0102999	0.018877	hypothetical protein
CNAG_04013	303.302	0.682766	1.60521	0.116227	5.8744	4.24384e-09	1.75134e-08	potassium channel protein
CNAG_03158	406.843	0.683042	1.60552	0.0980086	6.96921	3.18726e-12	1.71107e-11	alpha-1,3-mannosyltransferase CMT1
CNAG_02587	305.825	0.683139	1.60563	0.122404	5.581	2.39134e-08	9.15515e-08	alfa-L-rhamnosidase
CNAG_04209	4993.91	0.684793	1.60747	0.0388265	17.6373	1.27502e-69	7.9516e-68	voltage-gated potassium channel protein beta-2subunit
CNAG_01960	109.759	0.685314	1.60805	0.181447	3.77693	0.000158775	0.00039682	efflux protein EncT
CNAG_04777	68.2501	0.685756	1.60854	0.26377	2.59983	0.00932704	0.0172504	S-adenosylmethionine-dependent methyltransferase
CNAG_02235	49.2808	0.685952	1.60876	0.277658	2.47049	0.0134929	0.0242495	hypothetical protein
CNAG_04997	264.479	0.686495	1.60937	0.126587	5.42311	5.85705e-08	2.14748e-07	cytoplasmic protein
CNAG_02195	48.9534	0.686555	1.60944	0.278589	2.4644	0.0137243	0.0246123	origin recognition complex subunit 1
CNAG_06719	158.146	0.68716	1.61011	0.158661	4.33101	1.48427e-05	4.22945e-05	hypothetical protein
CNAG_02454	162.27	0.687753	1.61077	0.158043	4.35169	1.3509e-05	3.8689e-05	H/ACA ribonucleoprotein complex non-core subunitNAF1
CNAG_03903	492.463	0.687848	1.61088	0.0958666	7.17506	7.22754e-13	4.06656e-12	hypothetical protein
CNAG_05192	81.9514	0.688036	1.61109	0.216582	3.1768	0.00148911	0.0031747	hypothetical protein
CNAG_02024	143.312	0.689655	1.6129	0.164412	4.19466	2.73276e-05	7.54478e-05	hypothetical protein
CNAG_07635	312.125	0.691319	1.61476	0.121271	5.70063	1.19362e-08	4.7411e-08	kinetochore protein NDC80
CNAG_02940	1186.29	0.692403	1.61597	0.061843	11.1961	4.25861e-29	6.05921e-28	calcium/proton exchanger
CNAG_02328	471.29	0.692934	1.61657	0.104236	6.64774	2.97629e-11	1.46791e-10	pre-rRNA-processing protein TSR1
CNAG_06669	651.549	0.693482	1.61718	0.0825283	8.40295	4.35388e-17	3.21743e-16	hypothetical protein
CNAG_05863	43.3068	0.693612	1.61733	0.29603	2.34305	0.0191269	0.033264	hypothetical protein
CNAG_00542	253.061	0.694356	1.61816	0.128145	5.41851	6.00974e-08	2.19742e-07	salicylate hydroxylase
CNAG_03059	3084.68	0.694381	1.61819	0.0575708	12.0613	1.69042e-33	2.88495e-32	hypothetical protein
CNAG_07332	516.387	0.694837	1.6187	0.0908238	7.65039	2.00377e-14	1.25551e-13	hypothetical protein, variant
CNAG_01520	526.268	0.695032	1.61892	0.0958604	7.25046	4.15362e-13	2.3812e-12	histone-arginine methyltransferase CARM1
CNAG_02678	369.277	0.695875	1.61987	0.101787	6.83656	8.11182e-12	4.19289e-11	hypothetical protein
CNAG_06949	2565.78	0.696887	1.621	0.050884	13.6956	1.0786e-42	2.59837e-41	hypothetical protein
CNAG_00817	216.862	0.697012	1.62114	0.140686	4.95437	7.25651e-07	2.39716e-06	hypothetical protein
CNAG_00063	264.436	0.697118	1.62126	0.125944	5.53513	3.10995e-08	1.17713e-07	histone H3
CNAG_06917	497.035	0.698739	1.62309	0.0939528	7.43713	1.02898e-13	6.15818e-13	thiol-specific antioxidant protein 3
CNAG_05325	143.897	0.699124	1.62352	0.16897	4.13756	3.51023e-05	9.56462e-05	hypothetical protein
CNAG_05243	531.368	0.700042	1.62455	0.0867296	8.07155	6.94116e-16	4.82483e-15	xylulokinase
CNAG_02562	433.75	0.700066	1.62458	0.127514	5.49012	4.01665e-08	1.4999e-07	acyl-CoA dehydrogenase
CNAG_02000	4268.92	0.702339	1.62714	0.0395831	17.7434	1.93796e-70	1.22e-68	short-chain dehydrogenase
CNAG_03975	840.621	0.703501	1.62845	0.0709527	9.91508	3.57983e-23	3.73253e-22	ribosome biogenesis protein ERB1
CNAG_03446	115.225	0.704413	1.62948	0.182619	3.85727	0.000114659	0.000292589	hypothetical protein
CNAG_00871	143.236	0.705713	1.63095	0.161529	4.36895	1.24847e-05	3.59872e-05	hypothetical protein
CNAG_02168	1249.07	0.70577	1.63102	0.0686245	10.2845	8.2751e-25	9.39111e-24	glucoamylase
CNAG_07599	248.181	0.706046	1.63133	0.129578	5.44882	5.07051e-08	1.86627e-07	DNA mismatch repair protein PMS2
CNAG_03828	1084.68	0.707934	1.63346	0.0652116	10.856	1.86825e-27	2.43018e-26	aromatic amino acid aminotransferase I
CNAG_07707	99.7016	0.708618	1.63424	0.20192	3.5094	0.000449113	0.00104884	glycoside hydrolase family 3 domain-containingprotein
CNAG_00841	84.7148	0.708782	1.63442	0.216139	3.27929	0.00104068	0.00228136	hypothetical protein
CNAG_01059	422.119	0.709138	1.63483	0.102004	6.95204	3.6004e-12	1.92666e-11	vacuolar membrane protein, variant
CNAG_01678	1208.06	0.712525	1.63867	0.0666749	10.6865	1.17673e-26	1.47047e-25	Na /H exchanger AnNHA1
CNAG_04571	187.454	0.714138	1.6405	0.14152	5.04621	4.5065e-07	1.51801e-06	dimethyladenosine transferase
CNAG_00384	179.132	0.715901	1.64251	0.156095	4.58633	4.51108e-06	1.36643e-05	RAD51-like protein 2
CNAG_02202	775.622	0.716069	1.6427	0.0726459	9.85697	6.39482e-23	6.60567e-22	adenylylsulfate kinase
CNAG_03332	381.317	0.716377	1.64305	0.111196	6.44245	1.17564e-10	5.56386e-10	replication factor C subunit 2/4
CNAG_02337	181.826	0.717924	1.64481	0.148277	4.84176	1.28691e-06	4.13659e-06	uracil phosphoribosyltransferase
CNAG_01698	160.047	0.718922	1.64595	0.159044	4.52027	6.17616e-06	1.84153e-05	hypothetical protein
CNAG_07990	321.959	0.719342	1.64643	0.11637	6.18153	6.34833e-10	2.83361e-09	hypothetical protein
CNAG_06368	205.488	0.719515	1.64663	0.135691	5.30258	1.14176e-07	4.06345e-07	hypothetical protein
CNAG_02764	228.156	0.721609	1.64902	0.166454	4.33519	1.45633e-05	4.15659e-05	ATP-binding cassette, subfamily D (ALD),peroxisomal long-chain fatty acid import protein
CNAG_03128	2602.48	0.723776	1.6515	0.04502	16.0768	3.7132e-58	1.57823e-56	gamma-glutamyltransferase, variant
CNAG_02147	314.174	0.724871	1.65275	0.127226	5.6975	1.21575e-08	4.81468e-08	cytochrome c peroxidase
CNAG_02724	43.4205	0.727195	1.65542	0.319236	2.27793	0.022731	0.0390736	hypothetical protein
CNAG_02584	909.88	0.728201	1.65657	0.0769951	9.45775	3.14651e-21	2.99525e-20	serine/threonine-protein phosphatase 2A activator1
CNAG_01575	3678.65	0.728373	1.65677	0.0490135	14.8607	5.93437e-50	1.93171e-48	ATP-binding cassette transporter
CNAG_05326	247.037	0.72856	1.65698	0.144367	5.04658	4.49779e-07	1.51585e-06	hypothetical protein
CNAG_02045	213.606	0.729606	1.65819	0.139195	5.24161	1.59178e-07	5.59344e-07	acetoacetate-CoA ligase
CNAG_07567	210.165	0.729643	1.65823	0.138479	5.26899	1.37175e-07	4.84067e-07	hypothetical protein
CNAG_03234	178.003	0.730584	1.65931	0.148703	4.91304	8.96754e-07	2.92618e-06	cell wall surface anchor protein, variant
CNAG_02047	1788.69	0.732271	1.66125	0.0562797	13.0113	1.05562e-38	2.18086e-37	hypothetical protein
CNAG_06776	156.249	0.734286	1.66357	0.158281	4.63913	3.49881e-06	1.07394e-05	membrane protein, variant
CNAG_01416	478.822	0.736603	1.66625	0.0932888	7.89594	2.88138e-15	1.91891e-14	hypothetical protein
CNAG_04967	71.2559	0.736707	1.66637	0.228632	3.22224	0.00127192	0.002745	hypothetical protein
CNAG_07661	226.606	0.737693	1.66751	0.136042	5.42255	5.87541e-08	2.15303e-07	hypothetical protein
CNAG_00017	161.106	0.737729	1.66755	0.164982	4.47156	7.76502e-06	2.29071e-05	hypothetical protein
CNAG_01963	130.632	0.741946	1.67243	0.173298	4.28132	1.85784e-05	5.22799e-05	CMP/dCMP deaminase zinc-binding protein
CNAG_00770	312.726	0.7425	1.67307	0.114004	6.51291	7.37088e-11	3.56161e-10	DNA mismatch repair protein MSH2
CNAG_05524	643.516	0.745071	1.67606	0.0822946	9.0537	1.38205e-19	1.19617e-18	glycogen storage control protein
CNAG_02875	488.713	0.74633	1.67752	0.0917367	8.13557	4.09998e-16	2.89515e-15	hypothetical protein
CNAG_07433	380.621	0.746482	1.6777	0.103243	7.23034	4.81776e-13	2.74542e-12	hypothetical protein
CNAG_04096	330.675	0.750595	1.68249	0.114746	6.54136	6.09612e-11	2.96066e-10	racemase
CNAG_00664	164.68	0.750803	1.68273	0.16163	4.64519	3.39768e-06	1.04483e-05	hypothetical protein
CNAG_02881	71.1319	0.754899	1.68751	0.249428	3.02652	0.00247383	0.00506531	cytidine deaminase
CNAG_05388	1643.16	0.755041	1.68768	0.055157	13.689	1.18201e-42	2.82709e-41	formamidopyrimidine-DNA glycosylase
CNAG_02958	305.236	0.756663	1.68958	0.115639	6.54333	6.01654e-11	2.92626e-10	ferroxidase
CNAG_01964	179.567	0.757181	1.69018	0.154114	4.91312	8.96379e-07	2.92618e-06	OPT family small oligopeptide transporter
CNAG_07344	238.621	0.760277	1.69382	0.127584	5.95903	2.53746e-09	1.07303e-08	ras guanyl-nucleotide exchange factor, variant
CNAG_00231	206.053	0.760501	1.69408	0.135911	5.59556	2.19909e-08	8.44334e-08	hypothetical protein
CNAG_01624	211.74	0.760724	1.69434	0.140226	5.42497	5.79633e-08	2.12638e-07	hypothetical protein
CNAG_04873	181.532	0.761859	1.69567	0.148413	5.13335	2.84624e-07	9.79018e-07	hypothetical protein
CNAG_07534	621.837	0.76339	1.69747	0.0851715	8.96298	3.16023e-19	2.66266e-18	hypothetical protein
CNAG_01625	142.24	0.763457	1.69755	0.164323	4.64607	3.38323e-06	1.04134e-05	hypothetical protein
CNAG_03193	105.172	0.764186	1.69841	0.192167	3.97667	6.98879e-05	0.000183607	hypothetical protein
CNAG_06385	273.011	0.764248	1.69848	0.119702	6.38461	1.71838e-10	8.00753e-10	GAF domain-containing protein
CNAG_06185	649.981	0.764824	1.69916	0.0812979	9.40767	5.07268e-21	4.78783e-20	hypothetical protein, variant
CNAG_00840	120.857	0.765388	1.69983	0.177878	4.30289	1.68584e-05	4.76276e-05	hypothetical protein
CNAG_01138	3172.48	0.76931	1.70445	0.0452888	16.9868	1.02934e-64	5.32466e-63	cytochrome c peroxidase, mitochondrial
CNAG_01432	218.025	0.769992	1.70526	0.134387	5.72964	1.00643e-08	4.02875e-08	ribosome assembly protein 4
CNAG_04937	91.1196	0.770663	1.70605	0.233282	3.30357	0.000954634	0.00210727	peroxin-12
CNAG_00377	757.534	0.772154	1.70782	0.0808175	9.55429	1.24438e-21	1.21223e-20	DNA topoisomerase II, variant
CNAG_08024	67.0202	0.774142	1.71017	0.238717	3.24293	0.00118307	0.00256796	hypothetical protein
CNAG_06052	449.409	0.774708	1.71084	0.0978864	7.91436	2.48524e-15	1.6584e-14	galactose-1-phosphate uridylyltransferase
CNAG_02125	74.9585	0.775633	1.71194	0.224541	3.45431	0.000551697	0.00126598	hypothetical protein
CNAG_06253	63.267	0.775639	1.71195	0.240115	3.23028	0.00123667	0.00267671	sugar transporter
CNAG_03101	103.883	0.775966	1.71234	0.188634	4.1136	3.89531e-05	0.00010575	efflux protein EncT
CNAG_00728	161.024	0.781082	1.71842	0.178748	4.36975	1.24391e-05	3.58712e-05	dityrosine transporter
CNAG_03789	354.684	0.782723	1.72037	0.109306	7.16085	8.01758e-13	4.50348e-12	mRNA turnover protein 4
CNAG_01715	481.768	0.783503	1.72131	0.106531	7.35469	1.91372e-13	1.1202e-12	ribosome biogenesis protein BMS1
CNAG_07311	114.097	0.783977	1.72187	0.19613	3.99723	6.40881e-05	0.000169169	compass component bre2
CNAG_03167	428.684	0.784767	1.72281	0.0974974	8.04911	8.33981e-16	5.76103e-15	CAMK/CAMKL/Chk1 protein kinase
CNAG_03949	452.926	0.785052	1.72315	0.0932654	8.4174	3.84932e-17	2.85089e-16	4-nitrophenyl phosphatase
CNAG_03776	159.914	0.785672	1.72389	0.168061	4.67493	2.94055e-06	9.10548e-06	hypothetical protein
CNAG_00030	126.484	0.789637	1.72864	0.192537	4.10122	4.10985e-05	0.000111258	D-3-phosphoglycerate dehydrogenase, variant
CNAG_02598	83.9383	0.790071	1.72916	0.219328	3.60223	0.000315495	0.000757847	chitinase
CNAG_00109	578.482	0.790175	1.72928	0.0882148	8.9574	3.32418e-19	2.79022e-18	large subunit ribosomal protein L34, variant
CNAG_06055	303.809	0.790352	1.7295	0.115571	6.83868	7.99278e-12	4.14098e-11	hypothetical protein
CNAG_03070	597.205	0.791526	1.7309	0.0860534	9.19808	3.64405e-20	3.25962e-19	compass component swd2
CNAG_02076	1784.05	0.79169	1.7311	0.0584057	13.555	7.40002e-42	1.70866e-40	leukotriene A-4 hydrolase/aminopeptidase
CNAG_02333	77.7268	0.793002	1.73268	0.217064	3.65331	0.00025888	0.000629328	hypothetical protein
CNAG_06530	315.414	0.793138	1.73284	0.112462	7.05252	1.75709e-12	9.62651e-12	hypothetical protein
CNAG_05531	1738.61	0.796859	1.73731	0.0546476	14.5818	3.66828e-48	1.13853e-46	DNA excision repair protein ERCC-4
CNAG_01440	240.23	0.797104	1.73761	0.126716	6.2905	3.16436e-10	1.45325e-09	hypothetical protein
CNAG_05646	283.459	0.79715	1.73766	0.12277	6.49306	8.41106e-11	4.03211e-10	hypothetical protein
CNAG_00792	573.054	0.798045	1.73874	0.0910965	8.76043	1.945e-18	1.55998e-17	ATP-binding cassette transporter
CNAG_05637	795.945	0.798855	1.73972	0.084186	9.48917	2.32881e-21	2.236e-20	hypothetical protein
CNAG_00125	49.2603	0.799489	1.74048	0.313398	2.55103	0.0107404	0.0196359	hypothetical protein
CNAG_04663	628.206	0.801131	1.74247	0.0859892	9.31664	1.2008e-20	1.10829e-19	hypothetical protein
CNAG_05313	644.411	0.802197	1.74376	0.0932805	8.59984	7.98252e-18	6.12269e-17	hypothetical protein, variant 3
CNAG_03017	865.713	0.803374	1.74518	0.0703952	11.4123	3.62818e-30	5.40421e-29	transcription initiation factor TFIIF subunitalpha
CNAG_07423	246.737	0.804619	1.74668	0.126294	6.371	1.87799e-10	8.733e-10	hypothetical protein
CNAG_04839	457.063	0.80916	1.75219	0.0949035	8.52613	1.51327e-17	1.13974e-16	exosome complex component MTR3, animal type
CNAG_05227	317.362	0.80966	1.7528	0.112359	7.20601	5.76159e-13	3.26099e-12	hypothetical protein
CNAG_07818	191.5	0.810218	1.75348	0.146432	5.53306	3.14684e-08	1.19041e-07	hypothetical protein
CNAG_01264	3005.43	0.810776	1.75416	0.0445151	18.2135	4.03251e-74	2.83252e-72	homoisocitrate dehydrogenase
CNAG_02389	133.256	0.813029	1.7569	0.17973	4.52362	6.07896e-06	1.81336e-05	AGC protein kinase
CNAG_02324	710.765	0.814449	1.75863	0.0810942	10.0432	9.83853e-24	1.05891e-22	hypothetical protein, variant
CNAG_05320	341.991	0.815024	1.75933	0.10617	7.67658	1.63393e-14	1.02764e-13	oxidoreductase
CNAG_01794	557.58	0.815306	1.75967	0.0886756	9.19425	3.77615e-20	3.37326e-19	2-hydroxyacid dehydrogenase
CNAG_00133	134.366	0.815343	1.75972	0.166298	4.90291	9.44282e-07	3.07076e-06	hypothetical protein
CNAG_02208	2063.99	0.817	1.76174	0.0532363	15.3467	3.72793e-53	1.33029e-51	ribonucleoside-diphosphate reductase large subunit
CNAG_03513	278.336	0.818376	1.76342	0.127459	6.42072	1.35631e-10	6.38721e-10	ribosomal RNA-processing protein 7
CNAG_00974	79.2969	0.819781	1.76514	0.216369	3.78882	0.000151367	0.000379156	beta-lactamase
CNAG_01148	4184.02	0.820531	1.76606	0.0473981	17.3115	3.85541e-67	2.14393e-65	FK506-binding protein 4
CNAG_02600	27.5687	0.821857	1.76768	0.371571	2.21184	0.0269774	0.0457484	tartrate transporter
CNAG_01445	495.496	0.822717	1.76873	0.0928751	8.85831	8.12331e-19	6.65932e-18	autophagy-like protein 9
CNAG_02062	184.181	0.823213	1.76934	0.150227	5.47979	4.25834e-08	1.58306e-07	glycoside hydrolase family 2
CNAG_04626	255.304	0.823456	1.76964	0.145515	5.6589	1.52343e-08	5.96239e-08	hypothetical protein
CNAG_00689	677.133	0.824671	1.77113	0.0791622	10.4175	2.06326e-25	2.39863e-24	beta-1,4-mannosyltransferase
CNAG_00896	56.3164	0.827229	1.77427	0.265709	3.11328	0.00185018	0.00387052	transcription factor
CNAG_02998	748.073	0.827806	1.77498	0.0771929	10.7239	7.8656e-27	9.95961e-26	nuclear protein
CNAG_01538	47.3819	0.828071	1.77531	0.294045	2.81614	0.00486052	0.00944778	hypothetical protein
CNAG_01334	923.399	0.828977	1.77643	0.078954	10.4995	8.68475e-26	1.0312e-24	hypothetical protein
CNAG_03323	1652.24	0.829192	1.77669	0.053636	15.4596	6.49869e-54	2.42267e-52	hypothetical protein
CNAG_04707	51.989	0.829268	1.77678	0.279103	2.97119	0.00296651	0.00599139	hypothetical protein
CNAG_00127	224.723	0.831964	1.78011	0.132389	6.28422	3.29495e-10	1.50907e-09	hypothetical protein
CNAG_03043	44.2412	0.833278	1.78173	0.305079	2.73135	0.00630747	0.0120497	hypothetical protein, variant 2
CNAG_04072	57.9636	0.835248	1.78416	0.253334	3.29702	0.000977175	0.00215204	60S ribosome subunit biogenesis protein nip7
CNAG_06159	116.235	0.835313	1.78424	0.186453	4.48001	7.46403e-06	2.20778e-05	hypothetical protein
CNAG_07685	225.857	0.83581	1.78486	0.142001	5.88594	3.95792e-09	1.63943e-08	UMF1 family MFS transporter
CNAG_02430	212.033	0.83587	1.78493	0.146648	5.69983	1.19928e-08	4.76073e-08	ABC transporter ABCC.6
CNAG_04346	786.676	0.838503	1.78819	0.0725646	11.5553	6.94417e-31	1.06525e-29	dihydrodipicolinate synthase
CNAG_05159	74.0047	0.83904	1.78886	0.234121	3.58378	0.000338655	0.000809689	hypothetical protein
CNAG_00680	256.497	0.841967	1.79249	0.124817	6.74561	1.52383e-11	7.69759e-11	kinetochore protein Nuf2, variant
CNAG_02561	255.536	0.842181	1.79276	0.126654	6.64946	2.94178e-11	1.45196e-10	spermine transporter
CNAG_03342	951.067	0.842319	1.79293	0.0703931	11.9659	5.35925e-33	8.87401e-32	tRNA (guanine-N(7)-)-methyltransferase subunitTRM82
CNAG_03033	685.509	0.845242	1.79657	0.0811154	10.4202	2.00437e-25	2.33831e-24	hypothetical protein
CNAG_02157	144.642	0.846755	1.79845	0.180976	4.67882	2.88531e-06	8.94272e-06	hypothetical protein
CNAG_06472	791.248	0.847156	1.79895	0.0800075	10.5885	3.37097e-26	4.07509e-25	nucleolar protein 4
CNAG_07779	78.0575	0.847677	1.7996	0.238798	3.54977	0.000385564	0.000911073	D-glycerate 3-kinase
CNAG_04415	225.622	0.847718	1.79965	0.138257	6.13146	8.70775e-10	3.8405e-09	oxidoreductase
CNAG_01885	394.063	0.847868	1.79984	0.099754	8.49959	1.90255e-17	1.4297e-16	DNA polymerase sigma subunit
CNAG_01093	444.126	0.85156	1.80445	0.0961797	8.85384	8.45552e-19	6.88934e-18	hypothetical protein
CNAG_00488	205.529	0.853309	1.80664	0.14301	5.96677	2.41991e-09	1.02462e-08	hypothetical protein
CNAG_00550	364.938	0.853556	1.80695	0.102915	8.29383	1.0966e-16	7.9539e-16	DNA mismatch repair protein MSH5
CNAG_01279	382.555	0.855265	1.80909	0.100932	8.47369	2.37739e-17	1.77852e-16	ubiquitin-conjugating enzyme E2 S
CNAG_02291	211.817	0.857474	1.81186	0.134258	6.38677	1.69429e-10	7.90078e-10	DASH complex subunit DAM1
CNAG_04153	62.0931	0.858046	1.81258	0.252571	3.39725	0.000680679	0.00153452	hypothetical protein
CNAG_06338	146.101	0.859177	1.814	0.163025	5.27021	1.36268e-07	4.81121e-07	ABC transporter PMR5
CNAG_03642	268.92	0.860267	1.81537	0.127397	6.75263	1.45187e-11	7.35635e-11	hypothetical protein
CNAG_02054	535.805	0.861352	1.81674	0.0896695	9.60586	7.5528e-22	7.42265e-21	hypothetical protein
CNAG_02327	2454.62	0.861963	1.81751	0.0525593	16.3998	1.91802e-60	8.53262e-59	xaa-Pro dipeptidase
CNAG_02323	248.853	0.864767	1.82105	0.126638	6.82863	8.57323e-12	4.41429e-11	hypothetical protein
CNAG_03067	569.784	0.865221	1.82162	0.101289	8.54207	1.31836e-17	9.97443e-17	hydroxymethylglutaryl-CoA lyase
CNAG_04596	263.087	0.865257	1.82166	0.121959	7.09468	1.2965e-12	7.17971e-12	prolyl endopeptidase
CNAG_05721	1895.34	0.865735	1.82227	0.064324	13.459	2.72647e-41	6.16736e-40	multifunctional beta-oxidation protein
CNAG_07407	165.791	0.868838	1.82619	0.153292	5.66788	1.44576e-08	5.66836e-08	fungal mating-type pheromone
CNAG_03560	165.519	0.869182	1.82663	0.154671	5.61956	1.91446e-08	7.40591e-08	hypothetical protein
CNAG_03044	237.653	0.870027	1.8277	0.130448	6.66952	2.56644e-11	1.2733e-10	hypothetical protein, variant
CNAG_02059	393.629	0.870302	1.82805	0.10009	8.69522	3.46157e-18	2.71754e-17	CCR4-NOT complex subunit CAF16
CNAG_03382	1236.76	0.870857	1.82875	0.0613672	14.1909	1.04278e-45	2.88732e-44	hypothetical protein
CNAG_05644	549.777	0.874415	1.83326	0.0950219	9.20225	3.50526e-20	3.13968e-19	2-nitropropane dioxygenase
CNAG_06239	747.664	0.877371	1.83703	0.0756699	11.5947	4.38288e-31	6.81747e-30	hypothetical protein
CNAG_03570	44.0761	0.877668	1.8374	0.326346	2.68938	0.00715854	0.0135415	hypothetical protein
CNAG_04345	500.355	0.878569	1.83855	0.297027	2.95788	0.00309763	0.00623921	specific RNA polymerase II transcription factor
CNAG_01922	1501.36	0.880251	1.8407	0.0572265	15.3819	2.16543e-53	7.85321e-52	alternative cyclin Pho80
CNAG_02225	2045.84	0.881048	1.84171	0.0528813	16.6609	2.52399e-62	1.19451e-60	glucan 1,3-beta-glucosidase
CNAG_05022	133.889	0.881186	1.84189	0.176123	5.00324	5.63748e-07	1.87907e-06	hypothetical protein
CNAG_04849	92.4695	0.885134	1.84694	0.207787	4.25982	2.0459e-05	5.73143e-05	vacuolar protein
CNAG_02925	10056.8	0.885536	1.84745	0.035307	25.081	8.01252e-139	1.72476e-136	d-arabinitol 2-dehydrogenase
CNAG_07321	169.964	0.886329	1.84847	0.165019	5.37106	7.82742e-08	2.82185e-07	hypothetical protein
CNAG_01545	150.961	0.887847	1.85041	0.160963	5.51586	3.47087e-08	1.30632e-07	hypothetical protein, variant
CNAG_01209	482.705	0.893597	1.8578	0.100724	8.87171	7.2034e-19	5.92704e-18	1-phosphatidylinositol-3-phosphate 5-kinase
CNAG_03602	1467.52	0.894442	1.85889	0.0636697	14.0482	7.9063e-45	2.12737e-43	U3 small nucleolar RNA-associated protein 5
CNAG_06076	1286.24	0.894999	1.85961	0.0616518	14.517	9.45554e-48	2.88113e-46	cytoplasmic protein
CNAG_07831	42.492	0.895039	1.85966	0.294159	3.0427	0.00234467	0.00482158	hypothetical protein
CNAG_04024	174.823	0.895259	1.85994	0.165952	5.39468	6.86462e-08	2.4909e-07	sugar transporter
CNAG_06510	234.095	0.898007	1.86349	0.128189	7.00536	2.46355e-12	1.33653e-11	anaphase-promoting complex subunit 2
CNAG_00451	416.347	0.89872	1.86441	0.103434	8.6888	3.66279e-18	2.86875e-17	cytoplasmic protein
CNAG_01333	98.5447	0.900772	1.86706	0.206474	4.36265	1.28499e-05	3.69282e-05	Haspin protein kinase
CNAG_04875	369.102	0.904498	1.87189	0.104338	8.66888	4.36391e-18	3.39398e-17	hypothetical protein
CNAG_06862	216.029	0.90462	1.87205	0.132558	6.82431	8.83486e-12	4.54549e-11	vacuolar protein, variant 1
CNAG_07633	75.6364	0.906143	1.87403	0.225268	4.02252	5.75799e-05	0.000152897	hypothetical protein
CNAG_07552	562.242	0.90624	1.87415	0.0867619	10.4451	1.54245e-25	1.80892e-24	DNA repair protein Rad8
CNAG_00243	125.738	0.906664	1.8747	0.173228	5.23394	1.65933e-07	5.82161e-07	hypothetical protein
CNAG_07730	36.833	0.909369	1.87822	0.324698	2.80066	0.00509987	0.00987764	tricarboxylate transporter
CNAG_03243	460.333	0.911493	1.88099	0.106088	8.59189	8.55523e-18	6.53941e-17	2-nitropropane dioxygenase
CNAG_00273	38.4152	0.912594	1.88243	0.318283	2.86724	0.00414072	0.0081797	hypothetical protein
CNAG_06590	305.005	0.913723	1.8839	0.11586	7.88643	3.10966e-15	2.06887e-14	hypothetical protein
CNAG_06202	56.501	0.914664	1.88513	0.259614	3.52316	0.000426427	0.00100019	hypothetical protein
CNAG_05401	203.513	0.918049	1.88956	0.163661	5.60947	2.02946e-08	7.81903e-08	hypothetical protein
CNAG_05233	1442.24	0.919374	1.89129	0.0592873	15.5071	3.10632e-54	1.17775e-52	hypothetical protein
CNAG_06916	60.3333	0.920493	1.89276	0.252636	3.64356	0.000268894	0.000651775	hypothetical protein
CNAG_05897	76.601	0.921286	1.8938	0.232832	3.95687	7.59384e-05	0.000198176	hypothetical protein
CNAG_04305	598.903	0.922338	1.89518	0.083863	10.9982	3.90031e-28	5.25794e-27	hypothetical protein
CNAG_00555	310.292	0.922378	1.89524	0.124248	7.42369	1.13905e-13	6.77442e-13	hypothetical protein, variant
CNAG_04238	449.067	0.925995	1.89999	0.101331	9.13834	6.34185e-20	5.58301e-19	peroxisomal 2,4-dienoyl-CoA reductase
CNAG_02355	1217.79	0.927166	1.90154	0.0638383	14.5237	8.57806e-48	2.63785e-46	solute carrier family 35 (UDP-xylose/UDP-N-acetylglucosamine transporter), member B4
CNAG_02947	174.394	0.927909	1.90252	0.148796	6.23612	4.4855e-10	2.03756e-09	SCYL protein kinase
CNAG_04374	79.9178	0.92957	1.90471	0.220734	4.21128	2.53933e-05	7.04572e-05	hypothetical protein
CNAG_03204	306.125	0.931308	1.907	0.113502	8.20524	2.30123e-16	1.64942e-15	hypothetical protein
CNAG_04356	1132.43	0.934095	1.91069	0.154233	6.0564	1.392e-09	6.01607e-09	TPR repeat-containing protein
CNAG_02384	91.5501	0.935772	1.91291	0.207796	4.50332	6.68998e-06	1.98852e-05	hypothetical protein
CNAG_02578	386.815	0.937265	1.91489	0.108911	8.60577	7.58029e-18	5.82757e-17	thyroid hormone receptor interactor 13
CNAG_04835	798.34	0.939294	1.91759	0.0746107	12.5893	2.4191e-36	4.6655e-35	dihydrodipicolinate synthase
CNAG_05341	376.618	0.939833	1.91831	0.10769	8.72721	2.61024e-18	2.07854e-17	hypothetical protein
CNAG_02497	64.2368	0.942306	1.9216	0.268669	3.50731	0.000452668	0.00105544	thaumatin family protein, variant
CNAG_01620	190.366	0.942655	1.92206	0.15142	6.22543	4.80252e-10	2.17269e-09	hypothetical protein
CNAG_03729	718.166	0.943809	1.9236	0.170895	5.52274	3.33751e-08	1.25684e-07	peroxin-5, variant
CNAG_04174	63.2442	0.947339	1.92831	0.260427	3.63763	0.000275155	0.000666224	peroxin-6
CNAG_05359	356.436	0.94734	1.92831	0.112024	8.45661	2.75258e-17	2.05458e-16	hypothetical protein
CNAG_02103	200.088	0.948248	1.92953	0.155331	6.10469	1.03001e-09	4.51299e-09	hypothetical protein
CNAG_01796	444.112	0.949107	1.93068	0.10716	8.85692	8.2256e-19	6.7349e-18	hypothetical protein, variant 2
CNAG_00259	362.498	0.953169	1.93612	0.105386	9.04458	1.50242e-19	1.28864e-18	bud site selection protein
CNAG_07686	340.523	0.95547	1.93921	0.106308	8.98779	2.52244e-19	2.13336e-18	topoisomerase 1-associated factor 1
CNAG_00861	240.964	0.958502	1.94329	0.128092	7.48294	7.26758e-14	4.3809e-13	3-hydroxyacyl-CoA dehydrogenase
CNAG_06845	122.366	0.961771	1.9477	0.189187	5.0837	3.70143e-07	1.25634e-06	STE/STE11/CDC15 protein kinase
CNAG_03643	148.718	0.961872	1.94784	0.163456	5.88459	3.99054e-09	1.65191e-08	hypothetical protein
CNAG_04828	13036.3	0.963498	1.95003	0.0386022	24.9596	1.67793e-137	3.49901e-135	histone H3
CNAG_00909	419.111	0.963535	1.95008	0.10881	8.85524	8.35063e-19	6.8122e-18	phosphopantothenoylcysteine decarboxylase
CNAG_07960	422.976	0.963903	1.95058	0.0961671	10.0232	1.20518e-23	1.29088e-22	hypothetical protein
CNAG_02345	179.047	0.965608	1.95289	0.157305	6.13845	8.33281e-10	3.68244e-09	polycomb protein EED
CNAG_03442	101.684	0.967479	1.95542	0.191479	5.05268	4.35662e-07	1.4705e-06	phosphatidylinositol glycan, class T
CNAG_04795	423.014	0.968135	1.95631	0.106113	9.12361	7.26604e-20	6.37978e-19	adenine nucleotide transporter
CNAG_03361	380.713	0.968778	1.95718	0.106917	9.061	1.29259e-19	1.12165e-18	hypothetical protein
CNAG_00132	70.748	0.970048	1.95891	0.230238	4.21324	2.51737e-05	6.99642e-05	hypothetical protein
CNAG_02442	229.893	0.970218	1.95914	0.140613	6.89994	5.20231e-12	2.76393e-11	hypothetical protein
CNAG_03656	25.3587	0.972141	1.96175	0.393416	2.47103	0.0134726	0.0242194	hypothetical protein
CNAG_07470	992.902	0.973171	1.96315	0.0704473	13.8142	2.09348e-43	5.21261e-42	high-affinity phosphodiesterase
CNAG_06454	927.441	0.975158	1.96586	0.070249	13.8814	8.20737e-44	2.09037e-42	Atypical/RIO/RIO1 protein kinase
CNAG_01032	431.195	0.975469	1.96628	0.0973938	10.0157	1.30008e-23	1.38807e-22	hypothetical protein
CNAG_03134	273.252	0.976965	1.96832	0.125228	7.80149	6.11805e-15	3.98689e-14	3-hydroxybutyryl-CoA dehydrogenase
CNAG_04868	278.818	0.977861	1.96954	0.121447	8.05177	8.16048e-16	5.64299e-15	cytoplasmic protein, variant
CNAG_03752	337.69	0.981994	1.97519	0.108043	9.08896	9.9995e-20	8.73385e-19	hypothetical protein
CNAG_07663	19.9752	0.982182	1.97545	0.436003	2.2527	0.0242783	0.0414876	hypothetical protein
CNAG_04457	38.0836	0.983641	1.97745	0.323616	3.03953	0.00236948	0.00486509	hypothetical protein
CNAG_01959	261.8	0.984039	1.97799	0.129856	7.57794	3.51078e-14	2.1632e-13	condensin complex subunit 1
CNAG_06915	32.1812	0.984889	1.97916	0.348185	2.82864	0.00467468	0.00911044	hypothetical protein
CNAG_01425	206.39	0.985388	1.97985	0.147478	6.6816	2.36348e-11	1.1761e-10	hypothetical protein
CNAG_03272	216.267	0.985734	1.98032	0.13719	7.18517	6.71221e-13	3.78618e-12	hypothetical protein
CNAG_03720	254.149	0.988396	1.98398	0.124307	7.95124	1.8466e-15	1.24468e-14	D-tyrosyl-tRNA(Tyr) deacylase
CNAG_01608	232.286	0.988427	1.98402	0.133336	7.41307	1.23412e-13	7.30729e-13	nuclear GTP-binding protein
CNAG_04275	1436.78	0.988464	1.98407	0.0597403	16.546	1.71047e-61	7.76461e-60	metalloendopeptidase
CNAG_07589	335.771	0.992665	1.98986	0.109732	9.0463	1.47893e-19	1.2734e-18	xylitol dehydrogenase
CNAG_04025	578.663	0.993543	1.99107	0.089495	11.1017	1.23131e-28	1.71894e-27	transaldolase
CNAG_00229	405.085	0.99386	1.99151	0.112968	8.79771	1.39637e-18	1.13082e-17	hypothetical protein
CNAG_06066	54.5038	0.996892	1.9957	0.280699	3.55146	0.000383101	0.000906216	nucleoside-diphosphate-sugar epimerase
CNAG_04850	190.312	0.998435	1.99783	0.150073	6.65299	2.87198e-11	1.41961e-10	hypothetical protein, variant
CNAG_04147	316.148	0.998622	1.99809	0.11397	8.76216	1.91545e-18	1.53998e-17	ATP-dependent rRNA helicase RRP3
CNAG_06707	25.4626	1.00321	2.00445	0.423699	2.36774	0.0178972	0.0312802	hypothetical protein
CNAG_02170	55.3155	1.00471	2.00654	0.338903	2.9646	0.0030308	0.00611381	hypothetical protein
CNAG_08028	411.483	1.00569	2.0079	0.102688	9.79369	1.19838e-22	1.22089e-21	hypothetical protein
CNAG_02765	121.425	1.00726	2.0101	0.190373	5.29102	1.21636e-07	4.31515e-07	3-hydroxyisobutyrate dehydrogenase
CNAG_03312	57.0073	1.00822	2.01143	0.271782	3.70969	0.000207516	0.000510604	hypothetical protein
CNAG_03215	89.6822	1.00891	2.01239	0.218671	4.61382	3.95334e-06	1.20735e-05	hypothetical protein
CNAG_06659	2912.23	1.01115	2.01552	0.0465556	21.7192	1.34987e-104	1.8383e-102	hexosaminidase
CNAG_05472	30.6442	1.01163	2.01619	0.347106	2.91448	0.00356283	0.00711819	meiotic recombination protein SPO11, variant 1
CNAG_05801	82.7521	1.01277	2.01778	0.22157	4.57088	4.85689e-06	1.46453e-05	hypothetical protein
CNAG_02588	75.3291	1.01497	2.02086	0.22857	4.44054	8.97349e-06	2.62517e-05	avenacinase
CNAG_06440	536.299	1.01597	2.02227	0.0912148	11.1382	8.17167e-29	1.15041e-27	DNA dependent ATPase
CNAG_00564	724.576	1.01611	2.02245	0.0832065	12.2119	2.68625e-34	4.7801e-33	hypothetical protein
CNAG_00166	308.73	1.01611	2.02245	0.112106	9.06377	1.26015e-19	1.09492e-18	ATP-dependent RNA helicase DBP8
CNAG_01194	50.1922	1.01619	2.02257	0.288329	3.52441	0.000424431	0.000996211	hypothetical protein
CNAG_05256	8320.48	1.01796	2.02505	0.0387843	26.2467	7.79854e-152	2.08159e-149	catalase
CNAG_02311	18.1053	1.01804	2.02517	0.453405	2.24532	0.0247474	0.0422136	hypothetical protein
CNAG_07406	177.079	1.02492	2.03485	0.160358	6.39149	1.64279e-10	7.67136e-10	pheromone alpha
CNAG_02592	324.885	1.02923	2.04094	0.109431	9.40533	5.18672e-21	4.88856e-20	thioredoxin reductase GliT
CNAG_03192	293.524	1.03186	2.04465	0.118429	8.71284	2.96358e-18	2.34312e-17	tRNA-specific adenosine deaminase 1, variant
CNAG_06162	318.226	1.03206	2.04494	0.114053	9.04895	1.44343e-19	1.24445e-18	hypothetical protein
CNAG_04367	109.298	1.03453	2.04845	0.189024	5.47302	4.42442e-08	1.63841e-07	hypothetical protein
CNAG_00344	319.782	1.03906	2.05488	0.113364	9.16569	4.9233e-20	4.36297e-19	hypothetical protein
CNAG_03733	46.8865	1.03943	2.05541	0.284915	3.6482	0.000264083	0.00064151	hypothetical protein
CNAG_00687	155.446	1.03987	2.05605	0.157295	6.61097	3.8182e-11	1.87344e-10	hypothetical protein, variant
CNAG_06724	305.355	1.04262	2.05996	0.112828	9.24076	2.44744e-20	2.22807e-19	DNA repair and recombination protein RAD52
CNAG_04079	767.641	1.04303	2.06056	0.0797843	13.0732	4.68665e-39	9.92826e-38	HAT1-interacting factor 1
CNAG_02193	115.627	1.04334	2.061	0.193402	5.39469	6.86422e-08	2.4909e-07	kinetochore protein Spc25, fungi type
CNAG_00192	171.513	1.04501	2.06338	0.161214	6.48212	9.04413e-11	4.32627e-10	hypothetical protein
CNAG_00837	208.16	1.04801	2.06768	0.141546	7.40403	1.32111e-13	7.80845e-13	hypothetical protein
CNAG_06520	129.942	1.06089	2.08621	0.176773	6.00142	1.95597e-09	8.35605e-09	hypothetical protein
CNAG_01948	820.078	1.06398	2.0907	0.0724699	14.6817	8.44206e-49	2.65726e-47	nuclear protein
CNAG_00823	213.659	1.06551	2.09291	0.135897	7.84055	4.48586e-15	2.94918e-14	cadmium ion transporter
CNAG_00937	56.2327	1.06917	2.09822	0.256825	4.16301	3.14074e-05	8.60704e-05	hypothetical protein
CNAG_02720	20.2934	1.07674	2.10927	0.44961	2.39483	0.0166279	0.0292379	nuclear GTP-binding protein
CNAG_00613	180.026	1.07878	2.11224	0.152909	7.05503	1.72563e-12	9.46965e-12	cytosine deaminase
CNAG_06161	691.197	1.07934	2.11307	0.0819574	13.1695	1.31396e-39	2.83757e-38	hypothetical protein, variant
CNAG_03599	1072.7	1.08272	2.11802	0.0651768	16.612	5.70826e-62	2.66372e-60	mandelate racemase/muconate lactonizing enzyme
CNAG_02160	113.587	1.08607	2.12295	0.184835	5.87587	4.20639e-09	1.73696e-08	hypothetical protein, variant
CNAG_00923	1268.69	1.08826	2.12618	0.0640234	16.9979	8.51544e-65	4.43934e-63	membrane protein
CNAG_04614	535.706	1.09107	2.13031	0.0874275	12.4797	9.64017e-36	1.79858e-34	hypothetical protein
CNAG_02433	373.335	1.09332	2.13364	0.108211	10.1036	5.32693e-24	5.79879e-23	thiol oxidase
CNAG_01116	340.536	1.09338	2.13373	0.120883	9.04493	1.49765e-19	1.2862e-18	beta-ketoacyl reductase
CNAG_03696	86.6789	1.09457	2.1355	0.226358	4.83558	1.32761e-06	4.25511e-06	hypothetical protein
CNAG_03383	258.903	1.09644	2.13826	0.126292	8.68176	3.89679e-18	3.04488e-17	hypothetical protein
CNAG_02517	17.857	1.09722	2.13941	0.468834	2.34031	0.0192679	0.0334656	hypothetical protein
CNAG_07520	184.483	1.09836	2.14112	0.148746	7.38417	1.53407e-13	9.0352e-13	endopeptidase, variant 1
CNAG_05543	93.6845	1.0987	2.14162	0.234044	4.69442	2.67368e-06	8.32159e-06	hypothetical protein
CNAG_06956	681.705	1.10048	2.14426	0.0843819	13.0417	7.08669e-39	1.4778e-37	hypothetical protein
CNAG_03993	268.459	1.10111	2.14519	0.134899	8.16243	3.28338e-16	2.33582e-15	RP/EB family microtubule-associated protein
CNAG_03464	161.902	1.10152	2.1458	0.160093	6.88045	5.96634e-12	3.13986e-11	Cu-oxidase
CNAG_05597	193.37	1.10198	2.14649	0.141995	7.76067	8.4483e-15	5.43116e-14	transcription initiation factor TFIID subunit9/adenylate kinase
CNAG_06266	426.294	1.10641	2.15309	0.102631	10.7804	4.25806e-27	5.44331e-26	hypothetical protein
CNAG_06651	64.7298	1.10764	2.15493	0.241505	4.58642	4.50907e-06	1.36643e-05	amidohydrolase
CNAG_03906	61.3263	1.10901	2.15697	0.276013	4.01795	5.87062e-05	0.00015564	hypothetical protein
CNAG_00422	532.198	1.11046	2.15915	0.0885675	12.538	4.62273e-36	8.78846e-35	hypothetical protein
CNAG_01651	47.3416	1.11317	2.1632	0.289003	3.85174	0.000117283	0.000298713	glicosidase
CNAG_04824	32.8104	1.11877	2.17162	0.389774	2.87031	0.00410073	0.0081103	mitotic spindle assembly checkpoint protein MAD1
CNAG_00586	4134.18	1.11916	2.17221	0.101326	11.0452	2.31362e-28	3.15722e-27	hypothetical protein
CNAG_02025	346.789	1.1198	2.17317	0.112267	9.97445	1.97197e-23	2.07228e-22	DNA-directed RNA polymerase III subunit RPC3
CNAG_04486	61.8192	1.12104	2.17503	0.261407	4.28848	1.79899e-05	5.06739e-05	hypothetical protein
CNAG_05042	1092.55	1.12294	2.1779	0.0668091	16.8082	2.12601e-63	1.04315e-61	carnitine acetyltransferase
CNAG_05499	1244.11	1.12412	2.17968	0.0618772	18.1669	9.44214e-74	6.49561e-72	SHO1 osmosensor
CNAG_05321	219.132	1.12675	2.18366	0.13435	8.38663	5.00284e-17	3.69291e-16	transposase subfamily
CNAG_04603	154.837	1.12972	2.18816	0.16237	6.9577	3.45878e-12	1.85236e-11	replication fork protection complex subunitCsm3/Swi3
CNAG_05371	535.337	1.13464	2.19565	0.0902881	12.5669	3.20914e-36	6.15361e-35	hypothetical protein
CNAG_03284	104.483	1.13607	2.19782	0.20606	5.51331	3.5214e-08	1.3246e-07	rRNA biogenesis protein RRP36
CNAG_00303	77.3911	1.13723	2.19958	0.234716	4.84513	1.26527e-06	4.0729e-06	high-affinity nicotinic acid transporter
CNAG_05244	36.1775	1.13743	2.19988	0.352837	3.22366	0.00126563	0.0027323	hypothetical protein
CNAG_06650	239.753	1.13918	2.20256	0.130031	8.76085	1.9378e-18	1.55607e-17	hypothetical protein, variant
CNAG_01841	49.146	1.15007	2.21925	0.310798	3.70039	0.000215273	0.000527354	hypothetical protein
CNAG_01909	21.5541	1.15368	2.22481	0.42464	2.71685	0.00659065	0.0125548	signal transducer
CNAG_07573	1168.37	1.15592	2.22826	0.0633812	18.2376	2.59731e-74	1.84381e-72	DNA ligase 4, variant
CNAG_06141	371.185	1.15735	2.23048	0.106555	10.8616	1.75648e-27	2.28926e-26	dUTP pyrophosphatase
CNAG_04333	75.6546	1.16115	2.23636	0.500197	2.32139	0.0202657	0.0350526	hypothetical protein
CNAG_06433	1127.17	1.16513	2.24254	0.0651744	17.8771	1.7772e-71	1.15139e-69	AMP-binding protein
CNAG_00371	315.112	1.16518	2.24261	0.113533	10.2629	1.03588e-24	1.16764e-23	methylglutaconyl-CoA hydratase
CNAG_02665	397.548	1.16663	2.24487	0.105675	11.0398	2.455e-28	3.34331e-27	hypothetical protein
CNAG_01001	202.377	1.16933	2.24907	0.160866	7.26898	3.62205e-13	2.08541e-12	hypothetical protein
CNAG_02715	844.736	1.16958	2.24946	0.0732854	15.9593	2.45596e-57	1.01793e-55	alpha-1,6-mannosyltransferase
CNAG_06394	98.8641	1.16959	2.24948	0.201686	5.79906	6.66864e-09	2.70351e-08	hypothetical protein
CNAG_01612	179.627	1.1723	2.25371	0.150242	7.80275	6.05719e-15	3.95109e-14	CAMK/CAMKL protein kinase
CNAG_07758	535.433	1.17399	2.25635	0.0923191	12.7167	4.77862e-37	9.37874e-36	hypothetical protein
CNAG_05641	400.072	1.1744	2.25699	0.124155	9.45919	3.10337e-21	2.9584e-20	hypothetical protein, variant
CNAG_04410	380.511	1.17511	2.2581	0.103207	11.3859	4.91568e-30	7.30565e-29	endoplasmic reticulum protein
CNAG_01384	1001.26	1.18043	2.26645	0.0714123	16.5298	2.23754e-61	1.00886e-59	hypothetical protein
CNAG_07797	554.019	1.18343	2.27116	0.0936275	12.6398	1.27416e-36	2.47166e-35	transcriptional regulator
CNAG_06363	463.965	1.19142	2.28378	0.0965232	12.3434	5.28854e-35	9.5898e-34	nucleolar protein
CNAG_05831	230.522	1.19918	2.2961	0.133092	9.01022	2.0565e-19	1.75487e-18	endoribonuclease
CNAG_07456	77.7261	1.20607	2.30708	0.262253	4.59887	4.24787e-06	1.29493e-05	hypothetical protein
CNAG_03400	354.584	1.2105	2.31418	0.117608	10.2927	7.60361e-25	8.65852e-24	oxidoreductase
CNAG_07687	147.145	1.2126	2.31754	0.185731	6.52878	6.63092e-11	3.21805e-10	hypothetical protein
CNAG_02601	66.1206	1.21461	2.32078	0.245228	4.95299	7.3081e-07	2.40943e-06	hypothetical protein
CNAG_00501	57.2612	1.21879	2.32751	0.260443	4.67967	2.87331e-06	8.90967e-06	hypothetical protein
CNAG_04330	21.7953	1.22257	2.33362	0.417444	2.92871	0.00340374	0.00681668	hypothetical protein
CNAG_07391	46.2221	1.24896	2.3767	0.321167	3.88883	0.00010073	0.000259325	hypothetical protein
CNAG_04036	111.684	1.24989	2.37824	0.231194	5.40624	6.43622e-08	2.34693e-07	hypothetical protein
CNAG_04184	121.518	1.25164	2.38112	0.213734	5.85605	4.73994e-09	1.94285e-08	hypothetical protein
CNAG_05358	15.828	1.25202	2.38175	0.496205	2.5232	0.0116293	0.0211162	hypothetical protein
CNAG_05542	16.2669	1.25475	2.38626	0.52082	2.40918	0.0159884	0.0282101	hypothetical protein
CNAG_03310	336.767	1.25754	2.39087	0.111623	11.2659	1.93268e-29	2.77948e-28	nicotinamide N-methyltransferase
CNAG_00827	289.644	1.25762	2.39101	0.117534	10.7001	1.01708e-26	1.27574e-25	ribose 5-phosphate isomerase
CNAG_01674	98.0509	1.26148	2.39742	0.215976	5.84083	5.19406e-09	2.12247e-08	MFS transporter
CNAG_04898	109.18	1.26263	2.39932	0.192363	6.56378	5.24595e-11	2.5552e-10	MFS transporter
CNAG_04495	25.0973	1.26879	2.40959	0.430925	2.94433	0.00323653	0.00649935	hypothetical protein
CNAG_00849	371.821	1.26962	2.41098	0.108367	11.7159	1.0572e-31	1.69177e-30	hypothetical protein
CNAG_02479	104.321	1.27645	2.42242	0.203082	6.28538	3.27046e-10	1.49888e-09	monosaccharide transporter
CNAG_00681	101.842	1.28116	2.43034	0.208112	6.1561	7.45604e-10	3.30592e-09	condensin complex subunit 3, variant
CNAG_06431	1027.12	1.28367	2.43457	0.141717	9.05796	1.32913e-19	1.15186e-18	acyl-CoA oxidase
CNAG_03644	72.9478	1.28759	2.4412	0.229905	5.60053	2.13694e-08	8.21418e-08	hypothetical protein
CNAG_04006	18.8817	1.28996	2.4452	0.462684	2.78798	0.00530372	0.0102377	hypothetical protein
CNAG_03239	139.872	1.2908	2.44664	0.168061	7.68053	1.58435e-14	9.97393e-14	hypothetical protein, variant
CNAG_07693	16.7751	1.29138	2.44762	0.486249	2.6558	0.00791201	0.0148473	high-affinity methionine permease
CNAG_06229	895.59	1.2979	2.4587	0.0744659	17.4294	4.93541e-68	2.81487e-66	hypothetical protein
CNAG_02771	548.627	1.30472	2.47035	0.0887865	14.695	6.94161e-49	2.19533e-47	DNA repair and recombination protein RAD54B
CNAG_04160	49.7412	1.30604	2.47261	0.292174	4.47006	7.81976e-06	2.30483e-05	hypothetical protein, variant
CNAG_03078	999.123	1.32505	2.50541	0.0708914	18.6913	5.83157e-78	4.92583e-76	type I phosphodiesterase/nucleotidepyrophosphatase
CNAG_04492	74.3566	1.32873	2.51181	0.23428	5.67155	1.41511e-08	5.55145e-08	hypothetical protein
CNAG_02026	175.559	1.33408	2.52114	0.153808	8.67367	4.18424e-18	3.25804e-17	hypothetical protein
CNAG_03908	910.212	1.36117	2.56894	0.0722193	18.8478	3.06557e-79	2.65669e-77	WD-repeat protein
CNAG_02118	24.9232	1.36159	2.56968	0.398707	3.41501	0.00063779	0.00144368	hypothetical protein
CNAG_06259	313.774	1.36449	2.57486	0.128077	10.6537	1.6763e-26	2.09083e-25	MFS transporter, SP family, general alphaglucoside:H symporter
CNAG_01056	29.5821	1.36511	2.57595	0.407052	3.35364	0.000797569	0.00178178	hypothetical protein
CNAG_02603	390.224	1.36511	2.57596	0.105989	12.8797	5.85779e-38	1.17385e-36	early growth response protein 1
CNAG_02353	138.064	1.36619	2.57788	0.179654	7.60453	2.85951e-14	1.77668e-13	betaine lipid synthase
CNAG_02138	100.24	1.36698	2.5793	0.212741	6.42555	1.31395e-10	6.19209e-10	DNA replication ATP-dependent helicase Dna2
CNAG_05833	145.092	1.368	2.58113	0.167911	8.14718	3.72513e-16	2.63604e-15	allantoate transporter
CNAG_07666	47.9017	1.37326	2.59054	0.284254	4.83109	1.35786e-06	4.34788e-06	hypothetical protein
CNAG_02586	74.3101	1.37335	2.59072	0.237518	5.78209	7.37764e-09	2.97828e-08	sugar transporter
CNAG_04673	99.8432	1.37374	2.59141	0.204427	6.71993	1.81808e-11	9.13558e-11	NAD dependent epimerase/dehydratase
CNAG_03740	33.6953	1.38477	2.6113	0.341773	4.05171	5.08436e-05	0.000136312	hypothetical protein
CNAG_01075	56.1768	1.38783	2.61686	0.279252	4.96983	6.70124e-07	2.22253e-06	methylmalonate-semialdehyde dehydrogenase(acylating)
CNAG_00907	117.264	1.39575	2.63125	0.187486	7.44454	9.7286e-14	5.82755e-13	hypothetical protein
CNAG_06174	1248.51	1.39706	2.63365	0.0679212	20.5689	5.21502e-94	5.70489e-92	PEK/GCN2 protein kinase
CNAG_03630	192.022	1.40658	2.65108	0.156687	8.97701	2.78233e-19	2.34722e-18	hypothetical protein
CNAG_02010	175.139	1.41483	2.66628	0.15815	8.94614	3.68127e-19	3.08607e-18	tartrate transporter, variant
CNAG_03132	17.2202	1.42051	2.6768	0.509958	2.78554	0.00534382	0.0103091	hypothetical protein
CNAG_03010	318.804	1.42964	2.69379	0.126237	11.325	9.86557e-30	1.4437e-28	enoyl-CoA hydratase/isomerase
CNAG_00144	163.63	1.44204	2.71705	0.160051	9.00985	2.06339e-19	1.7585e-18	hypothetical protein
CNAG_06188	550.428	1.44667	2.72578	0.0972979	14.8684	5.28254e-50	1.72796e-48	hypothetical protein
CNAG_04363	42.6657	1.44828	2.72882	0.321459	4.50533	6.62712e-06	1.97071e-05	hypothetical protein
CNAG_05184	24.9022	1.44849	2.72923	0.428525	3.38019	0.000724358	0.00162694	glycosyl transferase family 8 protein
CNAG_07842	84.7899	1.45567	2.74283	0.217477	6.69343	2.18003e-11	1.08969e-10	hypothetical protein
CNAG_06321	33.3439	1.46258	2.75601	0.378971	3.85935	0.000113689	0.000290336	hypothetical protein, variant
CNAG_03095	22.5844	1.47021	2.77062	0.429922	3.41971	0.00062688	0.00142043	hypothetical protein
CNAG_05067	70.0518	1.47682	2.78334	0.238437	6.19374	5.87528e-10	2.62949e-09	hypothetical protein
CNAG_06561	77.6196	1.47692	2.78353	0.226513	6.52022	7.02045e-11	3.39967e-10	allantoate transporter
CNAG_00596	377.941	1.4778	2.78523	0.113205	13.0542	6.0173e-39	1.25873e-37	hypothetical protein
CNAG_00029	104.658	1.48754	2.80411	0.197157	7.54496	4.52418e-14	2.76717e-13	D-3-phosphoglycerate dehydrogenase
CNAG_00321	58.5011	1.49835	2.8252	0.264095	5.67354	1.3988e-08	5.49394e-08	dRaptor
CNAG_03532	50.359	1.51846	2.86486	0.293776	5.16878	2.35631e-07	8.15542e-07	3-beta hydroxysteroid dehydrogenase/isomerase
CNAG_03339	52.3712	1.52108	2.87007	0.281396	5.4055	6.46286e-08	2.35536e-07	biotin transporter, variant
CNAG_03068	153.12	1.52678	2.88142	0.174953	8.7268	2.61978e-18	2.08365e-17	hypothetical protein
CNAG_06374	787.575	1.53226	2.89238	0.0763504	20.0687	1.38506e-89	1.40037e-87	malate dehydrogenase (oxaloacetate-decarboxylating)(NADP )
CNAG_05766	61.9967	1.53967	2.90729	0.255454	6.0272	1.66826e-09	7.16826e-09	endoglucanase C
CNAG_05564	959.007	1.54253	2.91305	0.0793766	19.4331	4.05451e-84	3.75774e-82	peroxin-10
CNAG_03759	3965.25	1.54359	2.9152	0.0472701	32.6548	6.85836e-234	5.72073e-231	conidiation-specific protein 6
CNAG_04583	3147.82	1.5478	2.92372	0.0458165	33.7826	3.54818e-250	3.94616e-247	hypothetical protein
CNAG_08015	51.8086	1.55013	2.92844	0.286393	5.4126	6.21174e-08	2.2688e-07	hypothetical protein
CNAG_02406	388.639	1.55577	2.9399	0.10881	14.298	2.25242e-46	6.3959e-45	cell division control protein 45
CNAG_02508	172.696	1.56193	2.95248	0.15989	9.76879	1.53279e-22	1.55445e-21	hypothetical protein
CNAG_06329	60.4168	1.56905	2.9671	0.276481	5.67509	1.38616e-08	5.45069e-08	high-affinity nicotinic acid transporter
CNAG_01512	1312.91	1.56924	2.96748	0.130325	12.041	2.16357e-33	3.67367e-32	hypothetical protein, variant
CNAG_07869	49.4633	1.57062	2.97033	0.334629	4.69362	2.68412e-06	8.35017e-06	hypothetical protein
CNAG_02515	1416.12	1.57289	2.975	0.0652213	24.1162	1.69039e-128	3.22284e-126	hypothetical protein
CNAG_03922	168.11	1.57502	2.9794	0.157679	9.98875	1.70717e-23	1.80825e-22	hypothetical protein
CNAG_03838	121.911	1.58282	2.99555	0.185378	8.53833	1.36171e-17	1.02907e-16	hypothetical protein
CNAG_00585	32.3964	1.593	3.01676	0.380712	4.18427	2.86087e-05	7.88542e-05	hypothetical protein
CNAG_04138	21.6617	1.59702	3.02519	0.435568	3.66653	0.000245861	0.000598988	hypothetical protein
CNAG_04472	95.1721	1.5989	3.02911	0.21876	7.3089	2.69345e-13	1.56427e-12	membrane protein
CNAG_05938	152.391	1.60486	3.04167	0.16284	9.85547	6.49127e-23	6.6846e-22	hypothetical protein
CNAG_00903	84.1902	1.63721	3.11065	0.225425	7.26279	3.79178e-13	2.18125e-12	hypothetical protein, variant 1
CNAG_07747	2303.95	1.6553	3.14988	0.0596634	27.7439	2.06284e-169	9.83236e-167	acyl-CoA oxidase
CNAG_02924	1498.39	1.65879	3.15751	0.0612073	27.1011	9.55597e-162	3.751e-159	histone H1/5
CNAG_05185	16.5436	1.65922	3.15846	0.496549	3.34151	0.000833255	0.00185591	hypothetical protein
CNAG_02574	373.809	1.65967	3.15945	0.11124	14.9197	2.4539e-50	8.06644e-49	cofactor D
CNAG_06822	90.1261	1.66102	3.1624	0.222597	7.462	8.52219e-14	5.11868e-13	hypothetical protein
CNAG_01040	204.209	1.66645	3.17434	0.142732	11.6754	1.70192e-31	2.6976e-30	carboxypeptidase D
CNAG_07412	11.2867	1.69025	3.22714	0.594806	2.84169	0.00448748	0.00878152	hypothetical protein
CNAG_06516	176.828	1.69673	3.24165	0.17408	9.74684	1.90299e-22	1.91533e-21	hypothetical protein
CNAG_00748	261.773	1.70063	3.25043	0.130224	13.0593	5.62251e-39	1.18356e-37	hypothetical protein
CNAG_05182	394.95	1.70229	3.25417	0.214077	7.95178	1.83857e-15	1.24053e-14	hypothetical protein
CNAG_04618	224.173	1.71918	3.29249	0.137647	12.4898	8.48764e-36	1.59544e-34	hypothetical protein
CNAG_07969	226.306	1.72555	3.30705	0.155929	11.0662	1.82961e-28	2.51732e-27	hypothetical protein
CNAG_04874	244.246	1.73638	3.33198	0.139126	12.4806	9.52181e-36	1.7848e-34	hypothetical protein
CNAG_04960	40.5582	1.73664	3.33258	0.350708	4.95181	7.35258e-07	2.4217e-06	hypothetical protein
CNAG_00035	298.15	1.74291	3.34709	0.126458	13.7825	3.24721e-43	7.9664e-42	hypothetical protein
CNAG_01858	149.143	1.74539	3.35286	0.189321	9.21922	2.99276e-20	2.69874e-19	hypothetical protein
CNAG_04201	52.4143	1.75324	3.37114	0.288773	6.07133	1.26855e-09	5.50392e-09	hypothetical protein
CNAG_04047	241.713	1.76502	3.39879	0.135625	13.014	1.019e-38	2.11174e-37	hypothetical protein, variant
CNAG_06133	8.80259	1.76956	3.40949	0.680314	2.60109	0.00929284	0.0171967	hypothetical protein
CNAG_04677	624.158	1.78242	3.44002	0.0906898	19.654	5.34356e-86	5.24376e-84	xylitol dehydrogenase
CNAG_02781	308.441	1.79395	3.46763	0.125034	14.3477	1.10094e-46	3.22217e-45	dihydrodipicolinate synthetase
CNAG_03047	266.678	1.81116	3.50924	0.128733	14.0691	5.87824e-45	1.60104e-43	hypothetical protein
CNAG_05501	122.574	1.81822	3.52645	0.19592	9.28039	1.68863e-20	1.54783e-19	hypothetical protein
CNAG_02733	674.196	1.8342	3.56574	0.0986764	18.588	4.01549e-77	3.18993e-75	monosaccharide transporter
CNAG_05087	28.9714	1.84906	3.60264	0.387182	4.77568	1.791e-06	5.68842e-06	hypothetical protein
CNAG_05580	105.061	1.85765	3.62418	0.201769	9.20682	3.35926e-20	3.017e-19	hypothetical protein
CNAG_01883	28.0036	1.86789	3.64999	0.408948	4.56755	4.93446e-06	1.48658e-05	hypothetical protein
CNAG_02381	7.01554	1.87283	3.66249	0.791893	2.365	0.0180302	0.0314879	hypothetical protein
CNAG_02336	650.264	1.87669	3.6723	0.0899034	20.8745	9.14131e-97	1.0339e-94	hypothetical protein
CNAG_06718	170.877	1.88287	3.68808	0.160548	11.7277	9.18689e-32	1.47721e-30	hypothetical protein
CNAG_03461	342.253	1.8894	3.70481	0.12157	15.5417	1.81045e-54	6.90351e-53	hypothetical protein
CNAG_06448	556.679	1.89886	3.72918	0.0946099	20.0704	1.33945e-89	1.3751e-87	cystathionine gamma-lyase
CNAG_06160	2434.4	1.90788	3.75258	0.0517849	36.8424	3.86866e-297	6.45389e-294	guanyl nucleotide exchange factor Sql2
CNAG_02706	227.945	1.91828	3.77973	0.149063	12.8689	6.7319e-38	1.34497e-36	hypothetical protein
CNAG_01672	12.162	1.92673	3.80192	0.606724	3.17563	0.00149514	0.00318653	Ras family protein
CNAG_04461	88.445	1.93335	3.8194	0.228226	8.47118	2.42927e-17	1.81529e-16	ATP-dependent DNA helicase HFM1/MER3
CNAG_06225	5.70534	1.94296	3.84495	0.882468	2.20174	0.0276838	0.0468424	hypothetical protein
CNAG_02288	713.006	1.94444	3.84889	0.751487	2.58746	0.00966868	0.0178279	solute carrier family 25 (mitochondrial citratetransporter), member 1
CNAG_03695	166.135	1.94534	3.85128	0.162452	11.9748	4.81357e-33	7.99028e-32	hypothetical protein
CNAG_01758	226.268	1.9693	3.91577	0.147779	13.326	1.63526e-40	3.62529e-39	polygalacturonase
CNAG_07909	27.1451	1.97026	3.91837	0.408548	4.82258	1.41712e-06	4.53111e-06	meiotic recombinase Dmc1
CNAG_07505	7.40747	1.97748	3.93805	0.834403	2.36994	0.0177912	0.0311113	hypothetical protein
CNAG_09001	5.76337	1.99293	3.98044	0.884983	2.25194	0.0243261	0.0415586	hypothetical protein
CNAG_03600	385.545	2.00102	4.00282	0.113683	17.6017	2.39177e-69	1.46425e-67	ATP-binding cassette, subfamily B (MDR/TAP), member1
CNAG_07894	8.42679	2.00264	4.00733	0.746417	2.68301	0.00729635	0.0137772	hypothetical protein
CNAG_00032	67.5853	2.02233	4.0624	0.260908	7.75111	9.10904e-15	5.83525e-14	2,4-dihydroxyhept-2-ene-1,7-dioic acid aldolase
CNAG_05749	247.413	2.03045	4.08534	0.138364	14.6748	9.35259e-49	2.93004e-47	hypothetical protein
CNAG_05305	6.81375	2.03231	4.09059	0.820244	2.47769	0.0132237	0.0238042	hypothetical protein
CNAG_01862	179.386	2.03934	4.11056	0.170752	11.9433	7.03974e-33	1.16278e-31	hexose transporter
CNAG_06787	73.29	2.0397	4.1116	0.249037	8.19037	2.60428e-16	1.86263e-15	metacaspase
CNAG_06705	90.0577	2.04333	4.12197	0.236031	8.65706	4.84108e-18	3.76071e-17	hypothetical protein
CNAG_01936	375.402	2.11068	4.31896	0.121162	17.4204	5.78066e-68	3.26901e-66	sugar transporter
CNAG_02899	349.583	2.11597	4.3348	0.128888	16.4171	1.44183e-60	6.45727e-59	hypothetical protein
CNAG_02488	121.03	2.11655	4.33656	0.193978	10.9113	1.01772e-27	1.34747e-26	methionyl-tRNA formyltransferase
CNAG_07462	40.2937	2.13351	4.38784	0.34929	6.10813	1.00804e-09	4.42253e-09	hypothetical protein
CNAG_04442	17.261	2.14259	4.41553	0.53486	4.00589	6.17856e-05	0.00016335	hypothetical protein
CNAG_07658	10.0385	2.14519	4.42352	0.679456	3.15722	0.00159281	0.00337636	hypothetical protein
CNAG_03597	57.3699	2.15113	4.44175	0.283397	7.59053	3.186e-14	1.97036e-13	hypothetical protein, variant
CNAG_03340	66.0499	2.16993	4.50001	0.265149	8.18381	2.7501e-16	1.96482e-15	flavonol synthase
CNAG_01070	45.9789	2.18004	4.53165	0.32496	6.70863	1.96465e-11	9.83507e-11	class II aldolase/adducin family protein
CNAG_06521	212.058	2.18929	4.5608	0.152538	14.3523	1.02988e-46	3.02748e-45	hypothetical protein
CNAG_05528	34.163	2.18977	4.56231	0.448933	4.87771	1.07323e-06	3.47147e-06	hypothetical protein
CNAG_03510	156.537	2.19666	4.58416	0.183008	12.0031	3.42229e-33	5.70924e-32	large subunit ribosomal protein L36e
CNAG_05079	25.3998	2.20731	4.61814	0.446293	4.94588	7.58014e-07	2.49297e-06	hypothetical protein
CNAG_07461	7.80048	2.22911	4.68845	0.85625	2.60334	0.00923203	0.0170983	hypothetical protein
CNAG_05099	16.5515	2.25754	4.78175	0.567056	3.98116	6.8581e-05	0.000180316	hypothetical protein
CNAG_05259	46.2889	2.25869	4.78557	0.317596	7.11185	1.14501e-12	6.3672e-12	hypothetical protein, variant
CNAG_04116	33.9273	2.26468	4.80549	0.412045	5.49621	3.8805e-08	1.4523e-07	hypothetical protein
CNAG_05303	1843.86	2.28438	4.87156	0.812539	2.81141	0.00493242	0.00956804	isocitrate lyase
CNAG_02604	75.3212	2.32353	5.00555	0.266261	8.72649	2.62699e-18	2.08689e-17	hypothetical protein
CNAG_06907	33.9901	2.35329	5.1099	0.400138	5.8812	4.07307e-09	1.68425e-08	hypothetical protein
CNAG_01514	5.19019	2.40493	5.29609	1.05844	2.27215	0.0230773	0.0396077	hypothetical protein
CNAG_05279	138.819	2.42363	5.36518	0.191012	12.6884	6.86096e-37	1.33869e-35	hypothetical protein
CNAG_05129	36.2426	2.46788	5.53232	0.384767	6.41397	1.41779e-10	6.65793e-10	hypothetical protein
CNAG_07611	6.73656	2.47371	5.55471	0.897319	2.75678	0.00583739	0.0111966	hypothetical protein
CNAG_03552	20.9378	2.48937	5.61534	0.48332	5.15056	2.59705e-07	8.95612e-07	hypothetical protein
CNAG_05467	6.75791	2.5242	5.75253	0.858521	2.94017	0.00328035	0.00658141	hypothetical protein
CNAG_07578	125.431	2.55763	5.8874	0.203185	12.5877	2.46844e-36	4.74694e-35	hypothetical protein
CNAG_02476	660.733	2.56811	5.93034	0.0945572	27.1594	1.96196e-162	8.18261e-160	hypothetical protein, variant
CNAG_05064	69.3376	2.59896	6.0585	0.286671	9.06599	1.23476e-19	1.07566e-18	hypothetical protein
CNAG_03980	330.272	2.60483	6.08319	0.12909	20.1784	1.51538e-90	1.58002e-88	hypothetical protein, variant
CNAG_02805	119.327	2.63154	6.19689	0.211342	12.4516	1.37073e-35	2.53376e-34	carbonic anhydrase
CNAG_03091	9.78473	2.63173	6.19768	0.764156	3.44397	0.000573246	0.00131137	hypothetical protein
CNAG_07443	99.1899	2.65653	6.30515	0.233934	11.3559	6.93403e-30	1.02143e-28	hypothetical protein
CNAG_08007	4.90301	2.66281	6.33267	1.08978	2.44344	0.014548	0.0259154	hypothetical protein
CNAG_03327	93.4549	2.67118	6.3695	0.238984	11.1772	5.27139e-29	7.48426e-28	hypothetical protein
CNAG_01606	8.74176	2.70921	6.53965	0.775364	3.49412	0.000475628	0.00110395	hypothetical protein
CNAG_02053	7.87798	2.77553	6.84726	0.84744	3.27519	0.0010559	0.00230942	hypothetical protein
CNAG_02484	210.165	2.78323	6.88392	0.163166	17.0576	3.06754e-65	1.61179e-63	peptidyl-prolyl cis-trans isomerase
CNAG_07976	138.766	2.79317	6.93151	0.198685	14.0583	6.85064e-45	1.8583e-43	hypothetical protein
CNAG_07913	63.9066	2.80889	7.00747	0.296712	9.46672	2.88761e-21	2.76457e-20	hypothetical protein
CNAG_06853	3919.05	2.8224	7.07339	0.0484396	58.2664	0	0	hypothetical protein, variant 1
CNAG_07870	91.9727	2.85627	7.24143	0.247305	11.5496	7.41479e-31	1.13224e-29	hypothetical protein
CNAG_01193	162.256	2.90845	7.50813	0.208483	13.9506	3.12125e-44	8.04173e-43	hypothetical protein
CNAG_05659	14.2348	2.92306	7.58454	0.674917	4.33099	1.4844e-05	4.22945e-05	hypothetical protein
CNAG_01971	24.496	2.93125	7.62773	0.479977	6.10707	1.01477e-09	4.44911e-09	hypothetical protein
CNAG_03830	155.607	3.00088	8.0049	0.208649	14.3825	6.66744e-47	1.97741e-45	hypothetical protein
CNAG_07774	493.828	3.07007	8.39817	0.113504	27.0481	4.02064e-161	1.49054e-158	hypothetical protein
CNAG_07042	14.2647	3.07897	8.45012	0.656329	4.6912	2.71601e-06	8.44153e-06	hypothetical protein
CNAG_05092	4.87942	3.10424	8.59945	1.12298	2.7643	0.00570455	0.010967	hypothetical protein
CNAG_08017	12.7423	3.10583	8.60892	0.685078	4.53354	5.80024e-06	1.73409e-05	hypothetical protein
CNAG_04915	57.4663	3.14455	8.84309	0.32389	9.70871	2.76823e-22	2.77363e-21	hypothetical protein
CNAG_07577	10.0723	3.16572	8.97381	0.795876	3.97766	6.9598e-05	0.000182918	hypothetical protein
CNAG_01336	233.761	3.16622	8.9769	0.170251	18.5974	3.37335e-77	2.74517e-75	hypothetical protein
CNAG_07422	7.33077	3.29706	9.82913	0.941598	3.50156	0.000462539	0.00107619	delayed-type hypersensitivity antigen
CNAG_05728	45.4875	3.3603	10.2696	0.390128	8.61334	7.09595e-18	5.46781e-17	hypothetical protein
CNAG_07850	9.5465	3.37427	10.3695	0.848736	3.97564	7.0191e-05	0.000184331	hypothetical protein
CNAG_04509	109.941	3.54233	11.6505	0.255211	13.88	8.37694e-44	2.12545e-42	hypothetical protein
CNAG_07759	1.83647	4.31399	19.8903	1.69868	2.53961	0.0110976	0.0202389	hypothetical protein
CNAG_05010	2.00821	4.44247	21.7428	1.68451	2.63725	0.00835807	0.015601	hypothetical protein
CNAG_01268	130.821	4.60159	24.2782	0.297581	15.4633	6.1332e-54	2.29926e-52	hypothetical protein
CNAG_05514	100.197	4.86189	29.0787	0.363486	13.3757	8.38219e-41	1.88331e-39	hypothetical protein

## Sheet: without FLC
Supplementary table 2. DEGs (differentially expressed genes) in isw1D cells treated without FLC.
Gene ID	BaseMean	log2FoldChange	FoldChange	lfcSE	Stat	pvalue	padj	Description
CNAG_05256	136251	3.04812	8.27135	0.116369	26.1936	3.14726e-151	2.40608e-147	catalase
CNAG_05258	53362.9	3.99576	15.9531	0.155047	25.7713	1.86202e-146	7.11756e-143	glucose-methanol-choline oxidoreductase
CNAG_07976	758.706	3.22788	9.3689	0.132548	24.3525	5.44792e-131	1.38831e-127	hypothetical protein
CNAG_03830	852.117	3.43869	10.8429	0.148283	23.19	5.74896e-119	1.09877e-115	hypothetical protein
CNAG_01954	4669.15	2.26349	4.80151	0.111513	20.2979	1.34135e-91	2.05092e-88	aldo-keto reductase
CNAG_02604	1551.35	3.33699	10.105	0.171006	19.5139	8.36451e-85	1.06578e-81	hypothetical protein
CNAG_00433	1485.42	2.15182	4.44389	0.112865	19.0655	4.88624e-81	5.33647e-78	hypothetical protein
CNAG_06139	2194.55	1.73317	3.32458	0.0913607	18.9706	2.98306e-80	2.85069e-77	hypothetical protein
CNAG_02706	468.393	3.02655	8.14861	0.161566	18.7326	2.6835e-78	2.27949e-75	hypothetical protein
CNAG_01955	753.578	2.30178	4.93066	0.122962	18.7195	3.43626e-78	2.62702e-75	alcohol dehydrogenase
CNAG_01268	831.627	4.3693	20.6676	0.235852	18.5256	1.28397e-76	8.9236e-74	hypothetical protein
CNAG_05279	648.459	3.07057	8.40108	0.167806	18.2983	8.53297e-75	5.43622e-72	hypothetical protein
CNAG_00601	1547.42	1.79397	3.46768	0.107144	16.7436	6.30162e-63	3.70584e-60	glycosyl hydrolase
CNAG_03980	265.26	4.8378	28.5971	0.290017	16.6811	1.79981e-62	9.82824e-60	hypothetical protein, variant
CNAG_07842	583.321	2.5557	5.87954	0.158021	16.1732	7.79331e-59	3.97199e-56	hypothetical protein
CNAG_03238	1088.87	-2.47047	0.180432	0.153769	-16.0661	4.409e-58	2.10668e-55	dioxygenase subfamily protein
CNAG_02771	2360.82	1.47983	2.78917	0.0927292	15.9587	2.47942e-57	1.11501e-54	DNA repair and recombination protein RAD54B
CNAG_03252	573.709	2.49996	5.65671	0.157293	15.8937	7.00958e-57	2.97712e-54	hypothetical protein
CNAG_00815	8578.08	-1.50166	0.353147	0.0953542	-15.7482	7.06591e-56	2.8431e-53	MFS transporter, SIT family, siderophore-iron:Hsymporter
CNAG_05333	1164.91	-1.61132	0.327298	0.104306	-15.448	7.78067e-54	2.97416e-51	hypothetical protein
CNAG_01971	263.15	4.35899	20.5204	0.283965	15.3505	3.51704e-53	1.28037e-50	hypothetical protein
CNAG_01040	1133.96	1.50849	2.84512	0.0983124	15.3438	3.89643e-53	1.35401e-50	carboxypeptidase D
CNAG_03630	777.529	1.57874	2.98708	0.103453	15.2604	1.40421e-52	4.66747e-50	hypothetical protein
CNAG_01651	1008.32	2.03432	4.0963	0.133631	15.2234	2.47365e-52	7.87959e-50	glicosidase
CNAG_02781	3258.39	2.79927	6.9609	0.184753	15.1515	7.40837e-52	2.26548e-49	dihydrodipicolinate synthetase
CNAG_03339	668.518	2.35529	5.11696	0.156739	15.0268	4.89756e-51	1.44007e-48	biotin transporter, variant
CNAG_04915	341.756	3.10834	8.62387	0.209304	14.8509	6.86877e-50	1.87542e-47	hypothetical protein
CNAG_07758	2482.59	1.56414	2.95701	0.105394	14.8409	7.96777e-50	2.10047e-47	hypothetical protein
CNAG_02353	1046.2	2.11952	4.3455	0.143248	14.7961	1.55161e-49	3.95402e-47	betaine lipid synthase
CNAG_06448	2944.25	1.39719	2.63388	0.0944464	14.7935	1.61343e-49	3.97892e-47	cystathionine gamma-lyase
CNAG_04978	573.762	1.94399	3.84767	0.132207	14.7041	6.07125e-49	1.45046e-46	phytanoyl-CoA dioxygenase
CNAG_03838	1346.01	1.7087	3.26866	0.11686	14.6218	2.04033e-48	4.72677e-46	hypothetical protein
CNAG_03599	2380.22	1.12285	2.17777	0.0775704	14.4753	1.73633e-47	3.90419e-45	mandelate racemase/muconate lactonizing enzyme
CNAG_04677	2534.61	1.6394	3.11537	0.113752	14.4121	4.34404e-47	9.48863e-45	xylitol dehydrogenase
CNAG_03059	2854.95	1.50618	2.84056	0.10533	14.2996	2.19996e-46	4.67187e-44	hypothetical protein
CNAG_04461	978.749	2.12393	4.3588	0.149	14.2545	4.20101e-46	8.6802e-44	ATP-dependent DNA helicase HFM1/MER3
CNAG_01653	1232.83	1.90431	3.74329	0.134756	14.1315	2.42918e-45	4.88713e-43	cytokine inducing-glycoprotein
CNAG_05032	3768.1	-2.25982	0.208798	0.16007	-14.1177	2.95415e-45	5.79089e-43	hypothetical protein
CNAG_07747	9488.46	0.980739	1.97348	0.0695464	14.1019	3.69446e-45	7.06104e-43	acyl-CoA oxidase
CNAG_02925	25082.3	1.71251	3.2773	0.121496	14.0952	4.06368e-45	7.57727e-43	d-arabinitol 2-dehydrogenase
CNAG_07969	715.047	2.77547	6.84697	0.197221	14.0729	5.57531e-45	1.01484e-42	hypothetical protein
CNAG_02484	1111.07	2.22688	4.68122	0.158934	14.0114	1.32833e-44	2.36165e-42	peptidyl-prolyl cis-trans isomerase
CNAG_03754	1686.75	1.24336	2.3675	0.0897737	13.85	1.27274e-43	2.21138e-41	short-chain dehydrogenase/reductase SDR
CNAG_06787	420.044	2.34296	5.07344	0.169338	13.836	1.54594e-43	2.62637e-41	metacaspase
CNAG_03284	592.943	1.49281	2.81437	0.108941	13.7029	9.74954e-43	1.62033e-40	rRNA biogenesis protein RRP36
CNAG_01776	1583.47	1.5692	2.96739	0.115202	13.6212	2.99426e-42	4.87045e-40	2,4-dihydroxyhept-2-ene-1,7-dioic acid aldolase
CNAG_01936	657.341	1.9441	3.84798	0.144406	13.4627	2.59098e-41	4.12668e-39	sugar transporter
CNAG_07795	334.241	2.64885	6.27168	0.197707	13.3978	6.22545e-41	9.71298e-39	hypothetical protein
CNAG_02899	1775.85	3.72917	13.2615	0.278932	13.3694	9.12161e-41	1.39469e-38	hypothetical protein
CNAG_01193	457.989	2.07862	4.22403	0.15592	13.3313	1.52207e-40	2.28161e-38	hypothetical protein
CNAG_05552	4153.84	-13.6965	7.53239e-05	1.02808	-13.3225	1.71312e-40	2.51861e-38	transcription activator snf2l1
CNAG_05037	634.176	2.03718	4.10442	0.156063	13.0536	6.06416e-39	8.68099e-37	hypothetical protein
CNAG_04673	519.205	1.65201	3.14272	0.126565	13.0527	6.13176e-39	8.68099e-37	NAD dependent epimerase/dehydratase
CNAG_00827	1140.02	1.77235	3.4161	0.135852	13.0462	6.67728e-39	9.28143e-37	ribose 5-phosphate isomerase
CNAG_06160	12472.1	1.96805	3.9124	0.151474	12.9927	1.34627e-38	1.83789e-36	guanyl nucleotide exchange factor Sql2
CNAG_06529	1471.87	1.84641	3.59604	0.142692	12.9399	2.68129e-38	3.59622e-36	hypothetical protein
CNAG_05728	150.093	4.67062	25.4681	0.361241	12.9294	3.0737e-38	4.05145e-36	hypothetical protein
CNAG_03400	2398.01	2.11188	4.32254	0.164467	12.8407	9.69684e-38	1.25648e-35	oxidoreductase
CNAG_05064	337.994	2.19298	4.57249	0.17098	12.8259	1.17341e-37	1.49511e-35	hypothetical protein
CNAG_02476	1911.06	1.74773	3.35829	0.13634	12.8189	1.2859e-37	1.61159e-35	hypothetical protein, variant
CNAG_05075	336.056	2.91407	7.53743	0.229782	12.6819	7.45238e-37	9.18926e-35	solute carrier family 20 (sodium-dependentphosphate transporter)
CNAG_02515	3322.15	1.5783	2.98618	0.12518	12.6082	1.90263e-36	2.30882e-34	hypothetical protein
CNAG_02083	1061.13	-1.36801	0.387425	0.109035	-12.5465	4.15469e-36	4.96291e-34	siderochrome-iron transporter
CNAG_03091	117.48	3.13775	8.80148	0.25599	12.2573	1.53538e-34	1.80584e-32	hypothetical protein
CNAG_04618	1104.49	1.15878	2.23268	0.0952289	12.1683	4.58369e-34	5.30944e-32	hypothetical protein
CNAG_06521	739.597	1.67178	3.18608	0.138328	12.0857	1.25737e-33	1.43472e-31	hypothetical protein
CNAG_02572	465.713	2.23537	4.70885	0.185233	12.0679	1.56096e-33	1.75494e-31	hypothetical protein
CNAG_08017	397.657	4.13161	17.5282	0.342481	12.0637	1.64147e-33	1.8187e-31	hypothetical protein
CNAG_05514	423.824	4.67898	25.616	0.387965	12.0603	1.71151e-33	1.86921e-31	hypothetical protein
CNAG_05159	700.398	1.32299	2.50183	0.11214	11.7976	4.016e-32	4.32427e-30	hypothetical protein
CNAG_05813	1354.47	1.0174	2.02427	0.0862506	11.7959	4.09736e-32	4.3506e-30	hypothetical protein
CNAG_00069	262.103	1.97187	3.92277	0.167417	11.7782	5.05566e-32	5.29459e-30	hypothetical protein
CNAG_06503	276.548	2.09318	4.26688	0.178155	11.7492	7.12602e-32	7.36195e-30	uridine permease, variant
CNAG_00664	495.224	2.12397	4.35891	0.183179	11.595	4.36644e-31	4.45086e-29	hypothetical protein
CNAG_04331	544.033	1.87493	3.66785	0.161992	11.5742	5.56579e-31	5.59874e-29	hypothetical protein
CNAG_01056	651.054	2.32023	4.99411	0.200634	11.5645	6.23567e-31	6.19113e-29	hypothetical protein
CNAG_06098	4690.96	0.809041	1.75205	0.0707664	11.4326	2.87488e-30	2.81775e-28	glucosamine-6-phosphate deaminase
CNAG_01299	382.632	2.32693	5.01735	0.203792	11.4181	3.3946e-30	3.28502e-28	hypothetical protein, variant
CNAG_03597	618.701	1.37467	2.59309	0.120773	11.3823	5.12199e-30	4.8947e-28	hypothetical protein, variant
CNAG_00596	1383.02	1.48347	2.7962	0.131109	11.3147	1.10941e-29	1.04709e-27	hypothetical protein
CNAG_00812	3126.78	0.915352	1.88603	0.0810818	11.2892	1.4832e-29	1.38282e-27	cohesin complex subunit SA-1/2
CNAG_00456	64794.4	-1.37958	0.384332	0.122836	-11.231	2.87119e-29	2.64461e-27	hypothetical protein
CNAG_02924	5783.94	2.16498	4.48459	0.194925	11.1067	1.16363e-28	1.05904e-26	histone H1/5
CNAG_04015	680.981	1.32082	2.49809	0.119531	11.05	2.19153e-28	1.97109e-26	amino acid transporter
CNAG_01013	6443.53	1.47992	2.78933	0.13424	11.0244	2.91312e-28	2.58963e-26	chromatin binding protein
CNAG_02733	1328.14	1.98846	3.96813	0.180728	11.0025	3.71696e-28	3.26623e-26	monosaccharide transporter
CNAG_01796	3033.19	1.3487	2.54682	0.12279	10.9838	4.57141e-28	3.97142e-26	hypothetical protein, variant 2
CNAG_02900	580.798	1.43669	2.70699	0.130955	10.9709	5.27729e-28	4.53314e-26	hypothetical protein
CNAG_05129	95.4515	3.12637	8.73234	0.286019	10.9306	8.22911e-28	6.99017e-26	hypothetical protein
CNAG_05458	1787.38	-1.5727	0.336178	0.144449	-10.8876	1.32049e-27	1.10936e-25	endo-1,3(4)-beta-glucanase
CNAG_06758	2929.15	1.67698	3.19759	0.155328	10.7964	3.57883e-27	2.97393e-25	efflux protein
CNAG_05564	3172.98	1.43671	2.70704	0.134249	10.7018	9.97933e-27	8.20344e-25	peroxin-10
CNAG_06907	122.574	3.12685	8.73524	0.292553	10.6881	1.15662e-26	9.40675e-25	hypothetical protein
CNAG_00898	278.038	2.72377	6.60599	0.259229	10.5072	8.00409e-26	6.37409e-24	multidrug efflux pump
CNAG_03482	17409.5	-0.736056	0.600378	0.0704926	-10.4416	1.60063e-25	1.26153e-23	peroxiredoxin (alkyl hydroperoxide reductasesubunit C), variant
CNAG_01758	1199.59	2.2606	4.79191	0.217167	10.4095	2.24348e-25	1.75014e-23	polygalacturonase
CNAG_06154	4126.84	0.946159	1.92674	0.0909931	10.3981	2.52826e-25	1.95238e-23	cytoplasmic protein
CNAG_02805	759.152	2.48691	5.60576	0.243873	10.1976	2.03284e-24	1.5541e-22	carbonic anhydrase
CNAG_06438	774.144	2.85605	7.24032	0.288418	9.90249	4.06033e-23	3.07339e-21	hypothetical protein
CNAG_00344	1300.24	1.3498	2.54876	0.136887	9.86067	6.1636e-23	4.61968e-21	hypothetical protein
CNAG_03532	108.041	4.84245	28.6895	0.495281	9.77718	1.41082e-22	1.04715e-20	3-beta hydroxysteroid dehydrogenase/isomerase
CNAG_05729	78.5982	3.35626	10.2409	0.343414	9.77324	1.46691e-22	1.07832e-20	hypothetical protein
CNAG_07590	5639.9	-0.64308	0.640344	0.0658097	-9.77181	1.48763e-22	1.08314e-20	V-type H-transporting ATPase subunit C
CNAG_03047	1601.46	1.2796	2.42772	0.13137	9.7404	2.02758e-22	1.46235e-20	hypothetical protein
CNAG_00934	2357.21	0.834844	1.78366	0.085948	9.71336	2.6447e-22	1.8896e-20	allantoinase
CNAG_05111	3303.49	-0.70899	0.611748	0.0734794	-9.64883	4.972e-22	3.51953e-20	hypothetical protein
CNAG_05845	4944.23	-0.736825	0.600058	0.076577	-9.62201	6.45554e-22	4.52776e-20	protein FAM32A
CNAG_04850	1465.19	0.920295	1.8925	0.09605	9.58141	9.57277e-22	6.65308e-20	hypothetical protein, variant
CNAG_01680	1877.47	1.00221	2.00307	0.104835	9.55994	1.17829e-21	8.11536e-20	3-methylcrotonyl-CoA carboxylase alpha subunit
CNAG_05641	2042.96	1.72783	3.3123	0.181169	9.53715	1.46809e-21	1.0021e-19	hypothetical protein, variant
CNAG_06066	164.966	2.44366	5.44019	0.256405	9.53044	1.56615e-21	1.05957e-19	nucleoside-diphosphate-sugar epimerase
CNAG_05580	531.174	1.44367	2.72011	0.153412	9.4104	4.94258e-21	3.31456e-19	hypothetical protein
CNAG_05067	193.766	2.2697	4.82221	0.241446	9.40042	5.43432e-21	3.6071e-19	hypothetical protein
CNAG_02660	220.497	2.5299	5.77532	0.269148	9.39968	5.47317e-21	3.6071e-19	hypothetical protein
CNAG_07870	90.1296	2.94333	7.69183	0.313484	9.38908	6.05295e-21	3.95511e-19	hypothetical protein
CNAG_00162	45896.5	0.633669	1.55151	0.0676094	9.37249	7.08379e-21	4.58946e-19	alternative oxidase, mitochondrial
CNAG_05251	28337.4	-0.616343	0.652322	0.0662752	-9.29975	1.4077e-20	9.04357e-19	hypothetical protein
CNAG_05002	241.474	2.19055	4.56479	0.235908	9.28559	1.6082e-20	1.02456e-18	hypothetical protein
CNAG_03340	322.651	2.56946	5.93587	0.276951	9.27768	1.73201e-20	1.09432e-18	flavonol synthase
CNAG_01881	6716.99	-0.904568	0.534193	0.0978778	-9.24181	2.42358e-20	1.51871e-18	molecular chaperone GrpE
CNAG_07874	576.515	1.69129	3.22945	0.183976	9.19301	3.82012e-20	2.37437e-18	sugar transporter
CNAG_05010	688.007	3.08615	8.49228	0.335922	9.18712	4.03502e-20	2.48772e-18	hypothetical protein
CNAG_03707	1673.32	1.00074	2.00103	0.109415	9.14628	5.89281e-20	3.60404e-18	efflux protein
CNAG_02115	4880.04	0.935178	1.91213	0.102591	9.11564	7.82109e-20	4.74541e-18	nonhistone protein 6
CNAG_06797	2585.45	-1.5184	0.349073	0.166921	-9.09649	9.32995e-20	5.61634e-18	lysine-specific demethylase 3
CNAG_01606	64.196	4.66819	25.4252	0.513968	9.08265	1.05966e-19	6.32901e-18	hypothetical protein
CNAG_07011	5281.58	-0.783656	0.580893	0.0867565	-9.03282	1.6731e-19	9.91538e-18	hypothetical protein, variant
CNAG_03010	802.882	1.26162	2.39764	0.14016	9.00123	2.23194e-19	1.31256e-17	enoyl-CoA hydratase/isomerase
CNAG_07422	83.7036	4.4282	21.5289	0.492162	8.99746	2.3101e-19	1.34815e-17	delayed-type hypersensitivity antigen
CNAG_05833	491.408	1.27512	2.42018	0.142265	8.96294	3.16126e-19	1.8309e-17	allantoate transporter
CNAG_06063	10659.9	-1.11523	0.461616	0.124612	-8.94962	3.56693e-19	2.05032e-17	cytochrome c oxidase assembly protein subunit 15
CNAG_04981	87773.5	-0.764537	0.588642	0.0855532	-8.93639	4.02105e-19	2.2941e-17	catalase
CNAG_03759	34250.3	1.08658	2.1237	0.122015	8.90531	5.32357e-19	3.01472e-17	conidiation-specific protein 6
CNAG_07964	1554.11	0.855483	1.80936	0.0961182	8.90032	5.5685e-19	3.13023e-17	hypothetical protein
CNAG_02160	337.399	1.21778	2.32588	0.13694	8.89279	5.95912e-19	3.32536e-17	hypothetical protein, variant
CNAG_06133	154.233	10.6166	1570.1	1.20263	8.82785	1.06711e-18	5.91165e-17	hypothetical protein
CNAG_02659	1167.3	1.52943	2.88672	0.17347	8.81665	1.1793e-18	6.48617e-17	hypothetical protein, variant
CNAG_03934	372.056	3.51945	11.4673	0.400006	8.7985	1.38658e-18	7.46509e-17	hypothetical protein
CNAG_00373	7830.83	0.768303	1.70326	0.087408	8.78984	1.49768e-18	7.99089e-17	glucan 1,3-beta-glucosidase
CNAG_03894	1021.17	1.00875	2.01216	0.11477	8.78928	1.50515e-18	7.99089e-17	hypothetical protein
CNAG_00689	4401.53	0.754921	1.68754	0.0864751	8.72992	2.54847e-18	1.34366e-16	beta-1,4-mannosyltransferase
CNAG_05602	4607.3	0.644793	1.56352	0.0739121	8.72378	2.6907e-18	1.40893e-16	1-pyrroline-5-carboxylate dehydrogenase
CNAG_07913	82.2381	2.53186	5.78318	0.291728	8.67885	3.998e-18	2.07923e-16	hypothetical protein
CNAG_02336	4442.34	1.38224	2.60673	0.159857	8.64675	5.29879e-18	2.73711e-16	hypothetical protein
CNAG_07589	1130.02	1.79867	3.479	0.208237	8.63762	5.73969e-18	2.94496e-16	xylitol dehydrogenase
CNAG_05802	483.802	1.09178	2.13137	0.127277	8.57796	9.65746e-18	4.92208e-16	D-aspartate oxidase
CNAG_07749	2270.28	-0.849467	0.55499	0.0992839	-8.55594	1.16913e-17	5.9192e-16	3-ketodihydrosphingosine reductase TSC10
CNAG_01291	4765.57	-0.773391	0.585041	0.0905683	-8.53932	1.35014e-17	6.79065e-16	hypothetical protein
CNAG_06052	760.611	0.930022	1.9053	0.109056	8.52795	1.4896e-17	7.44312e-16	galactose-1-phosphate uridylyltransferase
CNAG_02010	458.732	1.28767	2.44134	0.151673	8.48978	2.07025e-17	1.02773e-15	tartrate transporter, variant
CNAG_00371	2009.36	1.13276	2.19277	0.133901	8.45966	2.68162e-17	1.31789e-15	methylglutaconyl-CoA hydratase
CNAG_06395	452.34	1.91821	3.77954	0.226757	8.45933	2.68922e-17	1.31789e-15	hypothetical protein, variant
CNAG_05079	135.525	2.09754	4.27979	0.248039	8.45649	2.75545e-17	1.34174e-15	hypothetical protein
CNAG_06705	833.45	1.62253	3.07914	0.192362	8.43477	3.31843e-17	1.60566e-15	hypothetical protein
CNAG_01500	365.764	4.46423	22.0733	0.530797	8.41043	4.08527e-17	1.96427e-15	taurine dioxygenase
CNAG_04147	1735.47	1.04178	2.05876	0.124012	8.40059	4.44232e-17	2.12259e-15	ATP-dependent rRNA helicase RRP3
CNAG_04174	648.121	1.24885	2.37651	0.149804	8.33656	7.64829e-17	3.62989e-15	peroxin-6
CNAG_00429	189.072	1.71116	3.27425	0.205277	8.33589	7.69184e-17	3.62989e-15	tRNA-dihydrouridine synthase 1
CNAG_06011	317.565	1.56583	2.96047	0.188098	8.32451	8.46767e-17	3.97149e-15	hypothetical protein
CNAG_03043	324.071	1.32561	2.50639	0.159271	8.32295	8.57989e-17	3.99959e-15	hypothetical protein, variant 2
CNAG_07951	711.732	0.890909	1.85434	0.107309	8.30226	1.02152e-16	4.73306e-15	WD-repeat protein JIP5
CNAG_05930	4232.45	0.606011	1.52204	0.0734054	8.25566	1.51063e-16	6.95708e-15	hypothetical protein
CNAG_05466	146.071	1.88301	3.68844	0.228624	8.23628	1.77644e-16	8.13225e-15	hypothetical protein
CNAG_02192	113.286	2.45649	5.4888	0.298323	8.23432	1.80582e-16	8.21755e-15	hypothetical protein
CNAG_04828	25345.1	2.19636	4.58323	0.267451	8.21222	2.17139e-16	9.82267e-15	histone H3
CNAG_04548	138.996	1.65984	3.1598	0.202625	8.19167	2.57633e-16	1.15859e-14	hypothetical protein
CNAG_01144	4198.32	0.743383	1.6741	0.0908342	8.18396	2.74674e-16	1.228e-14	replication factor A1
CNAG_04472	248.807	1.77785	3.42916	0.217874	8.15999	3.35041e-16	1.48918e-14	membrane protein
CNAG_01476	2670.43	-0.776168	0.583916	0.0951856	-8.15426	3.51336e-16	1.55258e-14	hypothetical protein
CNAG_01851	68.7655	2.46069	5.50481	0.302724	8.12851	4.34604e-16	1.90951e-14	hypothetical protein
CNAG_02849	517.454	1.30155	2.46494	0.160879	8.09027	5.95332e-16	2.58598e-14	glutathione transferase
CNAG_04042	449.438	1.03804	2.05343	0.12846	8.08065	6.44241e-16	2.78261e-14	hypothetical protein
CNAG_00748	590.535	1.52536	2.87858	0.189095	8.06664	7.22616e-16	3.08626e-14	hypothetical protein
CNAG_04410	1899.87	1.10954	2.15776	0.137849	8.04894	8.35141e-16	3.54703e-14	endoplasmic reticulum protein
CNAG_03272	1086.1	0.753	1.68529	0.0942321	7.99091	1.33951e-15	5.65778e-14	hypothetical protein
CNAG_03202	5304.98	-0.75332	0.593237	0.0943133	-7.98742	1.37794e-15	5.78811e-14	adenylate cyclase
CNAG_05184	103.146	2.08296	4.23674	0.261149	7.97612	1.51008e-15	6.3085e-14	glycosyl transferase family 8 protein
CNAG_04794	37441.2	-1.14683	0.451616	0.144107	-7.95822	1.74531e-15	7.22825e-14	spermine transporter
CNAG_01071	2322.55	-0.786313	0.579824	0.0988085	-7.95795	1.74915e-15	7.22825e-14	hypothetical protein
CNAG_05941	470.176	1.06102	2.0864	0.133355	7.95631	1.77244e-15	7.2851e-14	hypothetical protein
CNAG_07843	124.201	2.20112	4.59836	0.276796	7.95215	1.83307e-15	7.49401e-14	hypothetical protein
CNAG_06454	2266.6	0.888832	1.85168	0.112042	7.93306	2.13815e-15	8.69476e-14	Atypical/RIO/RIO1 protein kinase
CNAG_02592	1668.79	0.968977	1.95745	0.122226	7.92773	2.23181e-15	9.02761e-14	thioredoxin reductase GliT
CNAG_04898	476.111	1.23865	2.35978	0.156318	7.9239	2.30174e-15	9.21651e-14	MFS transporter
CNAG_02481	2475.09	-0.735141	0.600759	0.0927757	-7.92385	2.30262e-15	9.21651e-14	vacuolar protein
CNAG_04007	449.738	1.3722	2.58866	0.17325	7.92036	2.3682e-15	9.42963e-14	septin ring protein
CNAG_05416	5935.32	-0.588283	0.665134	0.0742923	-7.9185	2.40396e-15	9.52241e-14	pre-mRNA-processing protein 45
CNAG_04603	580.469	0.95256	1.9353	0.120527	7.9033	2.71615e-15	1.07036e-13	replication fork protection complex subunitCsm3/Swi3
CNAG_01138	15066.3	0.859201	1.81403	0.108776	7.89878	2.81644e-15	1.10419e-13	cytochrome c peroxidase, mitochondrial
CNAG_01873	49.2955	4.92615	30.4033	0.624842	7.88384	3.17463e-15	1.23827e-13	hypothetical protein
CNAG_03543	6182.7	-0.706414	0.612841	0.0898334	-7.86361	3.73231e-15	1.4484e-13	hypothetical protein, variant
CNAG_04095	794.993	1.04552	2.0641	0.133221	7.84795	4.22877e-15	1.63278e-13	alpha-L-rhamnosidase
CNAG_00726	415.309	3.15572	8.91183	0.40303	7.82999	4.87925e-15	1.87447e-13	hypothetical protein
CNAG_07687	1100.87	1.43159	2.69744	0.183093	7.81893	5.32758e-15	2.03647e-13	hypothetical protein
CNAG_03764	208.188	1.54076	2.90949	0.197114	7.81661	5.42628e-15	2.06387e-13	integral membrane protein
CNAG_04337	124.319	1.75683	3.37955	0.225266	7.79893	6.24344e-15	2.36292e-13	cation diffusion facilitator
CNAG_06027	471.896	1.84135	3.58345	0.236136	7.79784	6.29766e-15	2.3717e-13	aryl-alcohol dehydrogenase
CNAG_06931	2265.63	0.777211	1.71381	0.0999736	7.77416	7.595e-15	2.84626e-13	beta-glucosidase
CNAG_01545	908.599	0.78544	1.72362	0.101222	7.7596	8.51987e-15	3.17729e-13	hypothetical protein, variant
CNAG_03327	406.981	2.20705	4.6173	0.284815	7.74907	9.25716e-15	3.43548e-13	hypothetical protein
CNAG_02195	392.561	1.80244	3.4881	0.233034	7.73467	1.03671e-14	3.81042e-13	origin recognition complex subunit 1
CNAG_06561	180.594	1.30845	2.47676	0.16985	7.70356	1.32322e-14	4.81715e-13	allantoate transporter
CNAG_00303	436.761	1.37021	2.58509	0.179323	7.64103	2.15485e-14	7.8075e-13	high-affinity nicotinic acid transporter
CNAG_02598	453.98	1.12895	2.187	0.147783	7.6393	2.18409e-14	7.83914e-13	chitinase
CNAG_01771	2265.68	-0.781619	0.581714	0.102341	-7.63738	2.21684e-14	7.91952e-13	hypothetical protein
CNAG_06329	213.311	1.77728	3.4278	0.234024	7.59443	3.09156e-14	1.08692e-12	high-affinity nicotinic acid transporter
CNAG_01210	175.695	1.61079	3.05418	0.21211	7.5941	3.09938e-14	1.08692e-12	hypothetical protein
CNAG_03461	915.888	1.46298	2.75677	0.192746	7.59022	3.19358e-14	1.11484e-12	hypothetical protein
CNAG_00490	4879.97	0.843906	1.7949	0.111748	7.55187	4.29059e-14	1.49098e-12	acetyl-CoA acyltransferase
CNAG_03891	24078.9	-0.65385	0.635582	0.0866988	-7.54163	4.64141e-14	1.60559e-12	hsp60-like protein
CNAG_01674	880.136	1.73376	3.32593	0.23008	7.53545	4.86664e-14	1.67592e-12	MFS transporter
CNAG_01392	1025.14	-0.68455	0.6222	0.0909442	-7.52715	5.18613e-14	1.77e-12	hypothetical protein
CNAG_06853	16612.6	1.25985	2.39471	0.167454	7.52356	5.33042e-14	1.81116e-12	hypothetical protein, variant 1
CNAG_00595	1834.78	-1.0074	0.497443	0.133924	-7.52217	5.38756e-14	1.82247e-12	hypothetical protein
CNAG_03011	1848.17	0.781518	1.71894	0.104444	7.48266	7.2832e-14	2.45287e-12	glycerate-and formate-dehydrogenase
CNAG_07573	2677.4	0.593817	1.50923	0.0796791	7.45261	9.15124e-14	3.06847e-12	DNA ligase 4, variant
CNAG_07663	103.856	2.12783	4.37059	0.286444	7.42843	1.09897e-13	3.66884e-12	hypothetical protein
CNAG_04451	1625.14	0.641862	1.56034	0.0864501	7.42465	1.1308e-13	3.75869e-12	ribonuclease P/MRP protein subunit POP1
CNAG_02548	3166.07	-0.799456	0.574566	0.107782	-7.41733	1.19505e-13	3.95505e-12	cobalamin synthesis protein
CNAG_00699	2317.56	0.613812	1.5303	0.0829842	7.39673	1.39579e-13	4.59948e-12	transmembrane receptor
CNAG_03552	350.242	1.29262	2.44973	0.17517	7.37923	1.59202e-13	5.22361e-12	hypothetical protein
CNAG_01369	584.007	1.83285	3.5624	0.248483	7.37615	1.62931e-13	5.32312e-12	hypothetical protein, variant
CNAG_01794	1485.83	0.810011	1.75322	0.110032	7.36159	1.81736e-13	5.91222e-12	2-hydroxyacid dehydrogenase
CNAG_03650	385.832	1.12336	2.17854	0.15269	7.35715	1.87878e-13	6.08613e-12	hypothetical protein
CNAG_02963	863.614	0.841038	1.79134	0.114429	7.34984	1.98443e-13	6.40125e-12	anaphase-promoting complex subunit 8
CNAG_01078	603.058	1.15644	2.22906	0.157807	7.32817	2.33315e-13	7.49451e-12	aldehyde dehydrogenase (NAD )
CNAG_04116	130.802	2.4211	5.35577	0.330747	7.32008	2.4783e-13	7.91547e-12	hypothetical protein
CNAG_02583	837.97	0.922621	1.89556	0.126046	7.31972	2.48491e-13	7.91547e-12	tRNA (guanine10-N2)-methyltransferase
CNAG_00923	6169.07	0.831558	1.77961	0.114143	7.28526	3.21052e-13	1.01844e-11	membrane protein
CNAG_05626	4009.76	-0.74723	0.595746	0.1028	-7.26875	3.6282e-13	1.14618e-11	hypothetical protein
CNAG_07900	124.158	2.88738	7.39927	0.397374	7.26616	3.69857e-13	1.1636e-11	hypothetical protein
CNAG_05693	481.976	0.943911	1.92374	0.130391	7.23906	4.51815e-13	1.41563e-11	hypothetical protein
CNAG_03551	40.8859	3.82859	14.2076	0.529543	7.22999	4.83028e-13	1.50724e-11	hypothetical protein, variant
CNAG_05182	2261.15	1.04475	2.06301	0.144802	7.21504	5.39167e-13	1.67558e-11	hypothetical protein
CNAG_06266	1626.57	0.877961	1.83778	0.121711	7.2135	5.45307e-13	1.6878e-11	hypothetical protein
CNAG_05377	373.497	-1.25912	0.417798	0.17461	-7.21107	5.55142e-13	1.71131e-11	MFS transporter, SP family, solute carrier family 2(myo-inositol transporter), member 13
CNAG_07124	454.855	0.98678	1.98176	0.137028	7.20129	5.96452e-13	1.83127e-11	hypothetical protein
CNAG_04824	1947.15	0.607198	1.5233	0.0844123	7.19325	6.32692e-13	1.93477e-11	mitotic spindle assembly checkpoint protein MAD1
CNAG_00194	3082.49	1.1487	2.21714	0.161293	7.12181	1.06519e-12	3.24438e-11	hypothetical protein
CNAG_07619	2989.12	-0.751871	0.593833	0.105889	-7.10055	1.24262e-12	3.75487e-11	ATP-binding cassette, subfamily G (WHITE), member2, PDR
CNAG_05438	574.493	0.937088	1.91466	0.132361	7.07977	1.44393e-12	4.346e-11	hypothetical protein
CNAG_04878	1486.57	-1.051	0.482635	0.148968	-7.0552	1.72349e-12	5.16708e-11	hypothetical protein, variant
CNAG_02321	66.1896	2.42208	5.35944	0.345607	7.0082	2.414e-12	7.20899e-11	hypothetical protein
CNAG_05760	495.367	1.06535	2.09268	0.152029	7.00755	2.42531e-12	7.21459e-11	endoplasmic reticulum protein
CNAG_06248	8459.61	-0.590116	0.66429	0.084307	-6.9996	2.56687e-12	7.60611e-11	protein TIF31
CNAG_08028	1712.88	1.12863	2.18651	0.161858	6.97297	3.1032e-12	9.15983e-11	hypothetical protein
CNAG_06184	379.356	0.918535	1.89019	0.132181	6.94904	3.67767e-12	1.08138e-10	hypothetical protein
CNAG_00550	2033.95	0.944742	1.92484	0.135964	6.94844	3.69335e-12	1.08183e-10	DNA mismatch repair protein MSH5
CNAG_02045	1089.28	0.678106	1.60004	0.097755	6.93679	4.01116e-12	1.17043e-10	acetoacetate-CoA ligase
CNAG_04240	784.45	0.740433	1.67068	0.106881	6.92764	4.27916e-12	1.24388e-10	hypothetical protein
CNAG_04079	2708.39	0.665565	1.58619	0.0961154	6.92465	4.37057e-12	1.26564e-10	HAT1-interacting factor 1
CNAG_06165	5325.93	0.95069	1.9328	0.137323	6.92301	4.42146e-12	1.27555e-10	sterility protein Ste20
CNAG_07393	202.14	-1.51139	0.350774	0.218426	-6.91946	4.53359e-12	1.30298e-10	hypothetical protein
CNAG_07399	536.034	1.01498	2.02088	0.14674	6.91686	4.61779e-12	1.32221e-10	hypothetical protein
CNAG_06440	2876.1	0.897504	1.86284	0.129965	6.90574	4.99411e-12	1.42463e-10	DNA dependent ATPase
CNAG_01960	280.141	1.63037	3.09591	0.236143	6.90413	5.05115e-12	1.43554e-10	efflux protein EncT
CNAG_02026	984.849	0.762106	1.69596	0.111049	6.86279	6.75288e-12	1.90501e-10	hypothetical protein
CNAG_06259	800.844	1.27589	2.42148	0.1862	6.85224	7.27018e-12	2.0434e-10	MFS transporter, SP family, general alphaglucoside:H symporter
CNAG_05259	237.409	2.63691	6.21997	0.386002	6.83134	8.41276e-12	2.35588e-10	hypothetical protein, variant
CNAG_04231	641.119	1.38216	2.60658	0.202667	6.81984	9.11427e-12	2.5359e-10	hypothetical protein
CNAG_05571	3682.45	-0.796933	0.575571	0.116857	-6.81972	9.12194e-12	2.5359e-10	U3 small nucleolar RNA-associated protein 20
CNAG_06347	117799	-0.948284	0.518249	0.139067	-6.8189	9.17385e-12	2.54109e-10	hypothetical protein
CNAG_04416	615.031	1.00673	2.00935	0.14766	6.8179	9.23786e-12	2.54958e-10	major facilitator superfamily transporter
CNAG_00586	8100.59	1.63935	3.11526	0.2406	6.81359	9.51925e-12	2.61779e-10	hypothetical protein
CNAG_04727	4095.87	-0.678445	0.624839	0.0997498	-6.80146	1.03563e-11	2.83778e-10	hypothetical protein
CNAG_00095	377.069	1.14815	2.2163	0.168824	6.80088	1.03979e-11	2.83901e-10	hypothetical protein
CNAG_03933	726.298	1.29783	2.45858	0.191546	6.77554	1.23942e-11	3.34819e-10	transmembrane protein
CNAG_06650	1116.65	0.691749	1.61524	0.10269	6.7363	1.62469e-11	4.35815e-10	hypothetical protein, variant
CNAG_02475	5233.98	-1.65111	0.318396	0.245269	-6.73183	1.67546e-11	4.47864e-10	flavin-containing monooxygenase
CNAG_03243	2306.43	0.931223	1.90689	0.138751	6.71147	1.92672e-11	5.13232e-10	2-nitropropane dioxygenase
CNAG_03460	32.7412	3.29846	9.83865	0.492131	6.7024	2.05024e-11	5.4424e-10	phosphoglycerate dehydrogenase
CNAG_04184	831.378	0.858632	1.81332	0.128273	6.69377	2.1749e-11	5.75334e-10	hypothetical protein
CNAG_02043	701.165	1.03432	2.04815	0.155023	6.67206	2.52241e-11	6.64959e-10	hypothetical protein
CNAG_07691	797.081	-1.08148	0.472544	0.162171	-6.66875	2.5799e-11	6.77777e-10	hypothetical protein
CNAG_00451	1803.3	0.695231	1.61914	0.1044	6.65932	2.75092e-11	7.20234e-10	cytoplasmic protein
CNAG_00299	1652.45	0.826785	1.77373	0.124227	6.65544	2.82446e-11	7.34456e-10	DNA repair protein RAD5
CNAG_02602	926.125	0.862186	1.81779	0.129728	6.64613	3.00908e-11	7.7981e-10	flavonol synthase
CNAG_05302	528.984	0.889236	1.85219	0.133825	6.64477	3.03682e-11	7.8434e-10	amine oxidase
CNAG_02389	1151.41	1.07492	2.10661	0.162214	6.62659	3.43528e-11	8.84267e-10	AGC protein kinase
CNAG_06659	6043.41	0.6831	1.60559	0.103251	6.61591	3.69283e-11	9.44203e-10	hexosaminidase
CNAG_02596	98.5031	1.8759	3.6703	0.283826	6.60933	3.86052e-11	9.8379e-10	hypothetical protein
CNAG_07386	368.611	-0.912548	0.531246	0.138712	-6.57875	4.74425e-11	1.20498e-09	hypothetical protein
CNAG_02540	1401.96	-0.812868	0.569249	0.12369	-6.5718	4.97106e-11	1.2584e-09	hypothetical protein
CNAG_05831	619.928	1.22121	2.33142	0.185997	6.56576	5.17694e-11	1.30619e-09	endoribonuclease
CNAG_04238	1574.2	0.866203	1.82286	0.132018	6.56126	5.33563e-11	1.34181e-09	peroxisomal 2,4-dienoyl-CoA reductase
CNAG_01959	1347.87	0.846304	1.79789	0.129581	6.53108	6.5297e-11	1.63671e-09	condensin complex subunit 1
CNAG_01714	568.222	1.70339	3.25665	0.260888	6.52921	6.61164e-11	1.65183e-09	sulfonate dioxygenase
CNAG_01626	2928.97	0.721235	1.64859	0.11057	6.5229	6.89604e-11	1.71727e-09	transcriptional adapter 2-alpha
CNAG_03068	662.059	1.70662	3.26395	0.262745	6.49535	8.28415e-11	2.04959e-09	hypothetical protein
CNAG_02715	2332.89	1.16317	2.23948	0.179115	6.49395	8.36119e-11	2.06198e-09	alpha-1,6-mannosyltransferase
CNAG_05407	2023.45	0.618061	1.53481	0.0952465	6.48906	8.6371e-11	2.12317e-09	hypothetical protein
CNAG_05087	99.2754	2.15812	4.46333	0.333807	6.46517	1.01187e-10	2.46361e-09	hypothetical protein
CNAG_05326	443.381	0.753843	1.68628	0.116617	6.46423	1.01813e-10	2.46632e-09	hypothetical protein
CNAG_04691	724.978	1.59764	3.02648	0.247158	6.46404	1.01943e-10	2.46632e-09	hypothetical protein
CNAG_07476	883.287	0.794674	1.73469	0.123166	6.45204	1.10356e-10	2.65306e-09	hypothetical protein
CNAG_07856	5320.7	-0.670802	0.628157	0.104248	-6.43468	1.23734e-10	2.96534e-09	hypothetical protein
CNAG_04225	383.821	0.863105	1.81895	0.134231	6.43	1.276e-10	3.03207e-09	hypothetical protein
CNAG_02344	1144.96	-0.709846	0.611385	0.110398	-6.42988	1.27708e-10	3.03207e-09	uracil phosphoribosyltransferase
CNAG_07774	1631.77	1.96822	3.91285	0.306183	6.42823	1.29094e-10	3.05549e-09	hypothetical protein
CNAG_05227	1014.35	0.662224	1.58252	0.103265	6.41285	1.42826e-10	3.35971e-09	hypothetical protein
CNAG_01847	9656.67	-1.80656	0.285872	0.281908	-6.40832	1.47129e-10	3.45031e-09	hypothetical protein
CNAG_05072	381.99	1.41936	2.67467	0.221697	6.40226	1.53094e-10	3.57922e-09	endopeptidase
CNAG_07760	1330.72	-0.774437	0.584617	0.121021	-6.39921	1.56179e-10	3.64022e-09	hypothetical protein
CNAG_04926	2533.13	0.91398	1.88424	0.142861	6.39771	1.57723e-10	3.66501e-09	hypothetical protein
CNAG_05356	380.431	1.04739	2.06678	0.164025	6.38555	1.70783e-10	3.94453e-09	hypothetical protein
CNAG_02574	2845.76	0.622157	1.53917	0.0975199	6.3798	1.77321e-10	4.08319e-09	cofactor D
CNAG_03464	861.212	0.78403	1.72193	0.12297	6.37577	1.82051e-10	4.17953e-09	Cu-oxidase
CNAG_04874	1028.39	1.1946	2.28881	0.187589	6.36815	1.91318e-10	4.37077e-09	hypothetical protein
CNAG_04363	333.902	1.41128	2.65973	0.221621	6.36799	1.91525e-10	4.37077e-09	hypothetical protein
CNAG_02193	437.478	1.02886	2.04042	0.161944	6.35321	2.10866e-10	4.78359e-09	kinetochore protein Spc25, fungi type
CNAG_06836	582.294	1.42739	2.6896	0.224896	6.34689	2.19707e-10	4.9694e-09	oxidoreductase
CNAG_07970	5001.08	-0.685849	0.62164	0.108095	-6.3449	2.22571e-10	5.01933e-09	crossover junction endonuclease EME1
CNAG_07909	243.665	1.6106	3.05378	0.254054	6.33959	2.30379e-10	5.18014e-09	meiotic recombinase Dmc1
CNAG_05867	1425.09	-0.88164	0.54275	0.139093	-6.33851	2.32002e-10	5.20134e-09	L-fucose transporter
CNAG_06239	1410.94	1.00005	2.00007	0.157862	6.33495	2.37412e-10	5.30707e-09	hypothetical protein
CNAG_03955	3346.35	1.00351	2.00488	0.158494	6.33155	2.42707e-10	5.40961e-09	L-methionine transporter
CNAG_01841	316.536	1.36428	2.57448	0.215667	6.32589	2.51782e-10	5.59556e-09	hypothetical protein
CNAG_07462	148.718	1.56351	2.95571	0.247201	6.32484	2.53494e-10	5.61727e-09	hypothetical protein
CNAG_07881	350.188	1.5891	3.00861	0.25142	6.32047	2.60767e-10	5.74514e-09	hypothetical protein, variant 2
CNAG_05359	2494.63	0.720901	1.64821	0.114231	6.31092	2.77385e-10	6.09371e-09	hypothetical protein
CNAG_06363	1053.89	1.01289	2.01795	0.160745	6.30124	2.95269e-10	6.45587e-09	nucleolar protein
CNAG_03481	594.779	-1.19868	0.435672	0.190245	-6.30075	2.96214e-10	6.45587e-09	ribonuclease P protein component
CNAG_02863	131.247	1.21994	2.32937	0.193813	6.29442	3.08543e-10	6.70118e-09	formate dehydrogenase
CNAG_05727	221.107	1.54962	2.9274	0.247251	6.26739	3.67141e-10	7.9288e-09	hypothetical protein
CNAG_06433	7276.07	0.593251	1.50864	0.0949017	6.25121	4.07287e-10	8.72188e-09	AMP-binding protein
CNAG_08026	714.955	-0.694877	0.617762	0.111404	-6.23743	4.44808e-10	9.4723e-09	hypothetical protein
CNAG_03057	399.628	0.853093	1.80637	0.137162	6.21962	4.98362e-10	1.0554e-08	hypothetical protein
CNAG_03729	1261.67	0.596517	1.51206	0.0959513	6.21687	5.07163e-10	1.07107e-08	peroxin-5, variant
CNAG_06715	26.6467	5.61874	49.1372	0.910138	6.17351	6.6791e-10	1.39895e-08	hypothetical protein
CNAG_04509	478.723	1.85412	3.61532	0.300431	6.17155	6.76254e-10	1.41256e-08	hypothetical protein
CNAG_04215	16942.8	-0.943897	0.519827	0.153319	-6.15643	7.44037e-10	1.54991e-08	sulfate adenylyltransferase
CNAG_04835	1973.21	1.10552	2.15176	0.17969	6.15238	7.63301e-10	1.58498e-08	dihydrodipicolinate synthase
CNAG_05042	4056.18	0.990393	1.98673	0.160993	6.15179	7.66145e-10	1.58498e-08	carnitine acetyltransferase
CNAG_00053	980.359	-0.693464	0.618367	0.112869	-6.14395	8.04957e-10	1.65427e-08	hypothetical protein
CNAG_06296	1148.44	-1.60057	0.329747	0.261231	-6.12703	8.95328e-10	1.83083e-08	hypothetical protein, variant
CNAG_03082	5050.57	-0.853412	0.553474	0.139288	-6.12697	8.95658e-10	1.83083e-08	cupin domain-containing protein
CNAG_00873	20464.4	-0.791653	0.577682	0.129346	-6.12041	9.33361e-10	1.90281e-08	hypothetical protein
CNAG_06281	25.4058	3.59729	12.103	0.588088	6.11692	9.53988e-10	1.93969e-08	hypothetical protein
CNAG_02406	914.725	0.998283	1.99762	0.163344	6.11152	9.86871e-10	2.00123e-08	cell division control protein 45
CNAG_05938	1794.71	1.56853	2.96603	0.256826	6.10738	1.01278e-09	2.04834e-08	hypothetical protein
CNAG_06485	638.61	0.63473	1.55265	0.104128	6.09568	1.08973e-09	2.19236e-08	hexose transporter protein
CNAG_04160	215.558	1.44279	2.71846	0.237002	6.08767	1.14564e-09	2.29278e-08	hypothetical protein, variant
CNAG_03024	7156.62	-0.650656	0.636991	0.106952	-6.08362	1.17499e-09	2.34538e-08	AGC protein kinase, variant
CNAG_06822	1166.34	1.51414	2.85628	0.250305	6.04917	1.45592e-09	2.89857e-08	hypothetical protein
CNAG_05543	382.558	1.16814	2.24722	0.193295	6.04331	1.50983e-09	2.9981e-08	hypothetical protein
CNAG_00348	478.64	-1.1848	0.439886	0.196269	-6.03661	1.57388e-09	3.11717e-08	hypothetical protein
CNAG_06791	12797.8	-0.682084	0.623264	0.113726	-5.99761	2.00241e-09	3.91519e-08	hypothetical protein
CNAG_04827	419.368	-1.02557	0.491217	0.171329	-5.98594	2.15143e-09	4.17326e-08	hypothetical protein
CNAG_04442	77.9647	2.37367	5.1826	0.396566	5.98558	2.15623e-09	4.17326e-08	hypothetical protein
CNAG_05864	18655	-0.890903	0.539277	0.148891	-5.98361	2.18252e-09	4.21347e-08	hypothetical protein
CNAG_06322	3171.6	0.835114	1.784	0.139597	5.98231	2.19993e-09	4.23639e-08	hypothetical protein
CNAG_00471	3957.23	-1.05811	0.480261	0.177011	-5.97766	2.26368e-09	4.32646e-08	mitochondrial protein
CNAG_04274	565.058	1.02819	2.03946	0.172041	5.97643	2.28079e-09	4.34829e-08	acyl-CoA thioesterase II
CNAG_07626	695.186	0.880635	1.84119	0.147366	5.97582	2.28929e-09	4.35364e-08	NAD-binding Rossmann fold oxidoreductase
CNAG_00005	2113.94	0.767062	1.7018	0.128968	5.94769	2.71961e-09	5.14638e-08	TPR repeat-containing protein
CNAG_04982	454.471	0.954921	1.93847	0.161093	5.92776	3.07102e-09	5.79703e-08	cytosine-purine permease
CNAG_06530	2866.22	0.743987	1.6748	0.125741	5.91682	3.28217e-09	6.15005e-08	hypothetical protein
CNAG_00639	641.251	-1.03222	0.488958	0.174915	-5.90126	3.60746e-09	6.72659e-08	hypothetical protein
CNAG_01672	78.5731	1.59824	3.02773	0.271877	5.87852	4.13941e-09	7.6439e-08	Ras family protein
CNAG_00507	77.0392	1.57776	2.98506	0.269363	5.85738	4.70231e-09	8.64162e-08	nitrilase
CNAG_06688	20750.2	-0.632877	0.644889	0.10818	-5.85022	4.90916e-09	8.9786e-08	mitofusin
CNAG_03095	101.566	1.99577	3.98828	0.341467	5.84469	5.07518e-09	9.26008e-08	hypothetical protein
CNAG_07834	331.292	0.760465	1.69404	0.130157	5.84268	5.13686e-09	9.3503e-08	hypothetical protein
CNAG_06446	7597.79	-0.820254	0.566342	0.140406	-5.84203	5.15687e-09	9.36443e-08	mitochondrial splicing suppressor
CNAG_03644	422.779	1.13936	2.20284	0.195137	5.8388	5.25788e-09	9.50272e-08	hypothetical protein
CNAG_05061	705.199	0.730228	1.6589	0.125407	5.82285	5.78527e-09	1.04067e-07	hypothetical protein
CNAG_00484	11632.6	-0.615938	0.652505	0.105812	-5.82108	5.84689e-09	1.04928e-07	2-oxoisovalerate dehydrogenase E2 component(dihydrolipoyl transacylase)
CNAG_03892	7897.44	-0.987449	0.504369	0.169669	-5.81986	5.88971e-09	1.05449e-07	chaperonin GroES
CNAG_01336	446.66	1.15609	2.22852	0.198988	5.80982	6.25384e-09	1.11447e-07	hypothetical protein
CNAG_01608	908.288	0.969787	1.95855	0.167273	5.79763	6.72586e-09	1.1958e-07	nuclear GTP-binding protein
CNAG_02343	2251.99	0.733815	1.66303	0.126768	5.78864	7.09575e-09	1.25572e-07	hypothetical protein
CNAG_05548	458.599	1.00983	2.01367	0.174894	5.77393	7.74438e-09	1.36419e-07	hypothetical protein
CNAG_03239	621.303	0.610498	1.52679	0.105831	5.76863	7.99188e-09	1.40205e-07	hypothetical protein, variant
CNAG_00625	6952.35	-0.679168	0.624525	0.117737	-5.76854	7.996e-09	1.40205e-07	ARF guanyl-nucleotide exchange factor
CNAG_06875	1504.95	-1.06709	0.477282	0.185026	-5.76722	8.05918e-09	1.4099e-07	allantoate permease
CNAG_06290	34152.9	-0.984603	0.505365	0.170806	-5.76444	8.1931e-09	1.43005e-07	high-affinity glucose transporter SNF3, variant
CNAG_00195	770.694	-0.87439	0.545485	0.151834	-5.75887	8.4678e-09	1.47463e-07	exosome complex protein LRP1
CNAG_04894	339.024	-1.0213	0.492671	0.177635	-5.74945	8.95336e-09	1.55212e-07	hypothetical protein
CNAG_05916	63.4182	2.12717	4.36861	0.370968	5.73411	9.8026e-09	1.68786e-07	hypothetical protein
CNAG_02972	43.135	2.60042	6.06464	0.454131	5.72615	1.02736e-08	1.76498e-07	hypothetical protein
CNAG_03518	497.893	0.88307	1.8443	0.15461	5.71158	1.11932e-08	1.91866e-07	phenylacrylic acid decarboxylase
CNAG_01070	284.221	1.37101	2.58652	0.240079	5.71066	1.12537e-08	1.92471e-07	class II aldolase/adducin family protein
CNAG_07042	104.789	2.96243	7.79438	0.519229	5.70545	1.16038e-08	1.97575e-07	hypothetical protein
CNAG_00406	609.69	0.658106	1.57801	0.115926	5.67695	1.37117e-08	2.31915e-07	hypothetical protein
CNAG_03108	1019.76	0.934239	1.91088	0.165332	5.65068	1.59813e-08	2.68751e-07	hypothetical protein
CNAG_02454	1113.11	0.630441	1.54804	0.11199	5.62946	1.80779e-08	3.01759e-07	H/ACA ribonucleoprotein complex non-core subunitNAF1
CNAG_03912	457.493	0.741904	1.67238	0.132167	5.61338	1.98415e-08	3.29756e-07	membrane protein
CNAG_05337	3551.86	-0.665453	0.630491	0.118833	-5.59992	2.14451e-08	3.53336e-07	alpha-N-arabinofuranosidase, variant
CNAG_01869	1300.04	0.589827	1.50507	0.105584	5.58632	2.3193e-08	3.79681e-07	hypothetical protein
CNAG_01781	1659.92	-0.835391	0.560431	0.149675	-5.58138	2.38621e-08	3.89798e-07	hypothetical protein, variant 1
CNAG_00032	250.793	1.3032	2.46776	0.233702	5.57634	2.45634e-08	4.004e-07	2,4-dihydroxyhept-2-ene-1,7-dioic acid aldolase
CNAG_03128	5258.46	1.05419	2.07656	0.189486	5.56344	2.64515e-08	4.29345e-07	gamma-glutamyltransferase, variant
CNAG_02120	3952.81	0.650049	1.56922	0.116932	5.55922	2.7098e-08	4.38907e-07	TIGR01456 family HAD hydrolase
CNAG_07818	734.487	0.789776	1.72881	0.142121	5.55708	2.74324e-08	4.43385e-07	hypothetical protein
CNAG_06623	3827.9	-1.01198	0.495866	0.182246	-5.55281	2.81116e-08	4.53403e-07	inositol oxygenase
CNAG_05712	7918.89	-0.736868	0.600041	0.133006	-5.54009	3.0232e-08	4.86576e-07	6,7-dimethyl-8-ribityllumazine synthase
CNAG_00937	343.269	1.42184	2.67927	0.2568	5.53675	3.0814e-08	4.94901e-07	hypothetical protein
CNAG_00321	695.465	1.08117	2.11575	0.195583	5.52795	3.23986e-08	5.1926e-07	dRaptor
CNAG_07578	708.694	2.03084	4.08644	0.368299	5.51412	3.50534e-08	5.59463e-07	hypothetical protein
CNAG_06141	1051.01	1.12515	2.18124	0.204255	5.50854	3.6183e-08	5.7629e-07	dUTP pyrophosphatase
CNAG_06470	1003.28	-0.701172	0.615073	0.127315	-5.50735	3.64267e-08	5.78965e-07	hypothetical protein
CNAG_04465	6079.33	-0.598859	0.660276	0.108752	-5.50664	3.65748e-08	5.80051e-07	small nuclear ribonucleoprotein, variant
CNAG_06603	3610.85	0.604816	1.52079	0.109841	5.50629	3.66468e-08	5.80051e-07	di-and tripeptidase
CNAG_07448	2904.29	-0.650811	0.636922	0.118213	-5.50543	3.68263e-08	5.81688e-07	urea transporter
CNAG_04278	1446.05	0.655306	1.57495	0.119978	5.4619	4.71057e-08	7.42521e-07	DNA ligase 1
CNAG_00925	1673.63	0.753419	1.68578	0.138332	5.44647	5.13802e-08	8.04922e-07	hypothetical protein, variant
CNAG_06719	905.778	0.797322	1.73787	0.14641	5.44582	5.1566e-08	8.06181e-07	hypothetical protein
CNAG_05131	1309.78	1.97373	3.92783	0.362565	5.44381	5.21534e-08	8.137e-07	hypothetical protein
CNAG_03921	1944.05	0.650846	1.57009	0.119598	5.44194	5.27037e-08	8.20611e-07	hypothetical protein
CNAG_00702	3795.16	0.595449	1.51094	0.109506	5.43757	5.4012e-08	8.39271e-07	hypothetical protein
CNAG_00335	3542.59	0.710468	1.63634	0.130907	5.42728	5.72204e-08	8.87322e-07	hypothetical protein
CNAG_02412	315.083	-0.860554	0.550741	0.158712	-5.42212	5.88954e-08	9.11449e-07	rRNA-processing protein CGR1
CNAG_03600	2307.28	0.619712	1.53657	0.114708	5.40252	6.57111e-08	1.01079e-06	ATP-binding cassette, subfamily B (MDR/TAP), member1
CNAG_06346	665.125	-0.877949	0.54414	0.162575	-5.40026	6.65452e-08	1.02156e-06	hypothetical protein
CNAG_01791	2143.55	0.730504	1.65922	0.135506	5.39095	7.00863e-08	1.07162e-06	ribosome production factor 1
CNAG_05189	808.742	0.685519	1.60828	0.127315	5.38443	7.2674e-08	1.10676e-06	hypothetical protein
CNAG_06607	1874.08	0.652587	1.57198	0.121299	5.37998	7.44959e-08	1.13e-06	DNA polymerase alpha subunit A
CNAG_03125	911.157	0.730048	1.65869	0.135726	5.37885	7.49638e-08	1.13485e-06	hypothetical protein
CNAG_00014	627.294	-0.787504	0.579345	0.146616	-5.3712	7.82136e-08	1.17938e-06	hypothetical protein
CNAG_08015	132.586	1.52563	2.87913	0.284522	5.36209	8.22645e-08	1.23802e-06	hypothetical protein
CNAG_07984	92.2059	1.34728	2.54433	0.251349	5.36021	8.31246e-08	1.2485e-06	hypothetical protein
CNAG_05534	3210.56	0.786281	1.72462	0.147012	5.3484	8.87354e-08	1.32756e-06	pyridoxal reductase
CNAG_02260	2559.73	-0.717081	0.608327	0.13431	-5.339	9.3459e-08	1.39278e-06	protein FAM50
CNAG_03038	3184.48	0.89192	1.85564	0.167215	5.33396	9.60921e-08	1.42923e-06	hypothetical protein
CNAG_03092	2969.85	-0.621991	0.649773	0.116657	-5.33181	9.72413e-08	1.44351e-06	hypothetical protein
CNAG_04280	100.197	2.11623	4.33558	0.397468	5.32427	1.01359e-07	1.50173e-06	hypothetical protein
CNAG_02504	559.011	0.71004	1.63585	0.133813	5.30622	1.11921e-07	1.65181e-06	hypothetical protein
CNAG_05644	2848.47	0.728903	1.65738	0.137454	5.30287	1.13998e-07	1.67636e-06	2-nitropropane dioxygenase
CNAG_01566	858.208	0.754373	1.6869	0.142488	5.2943	1.19474e-07	1.74977e-06	gamma-tubulin complex component 3
CNAG_07811	27.2481	2.37954	5.20372	0.451243	5.27331	1.33986e-07	1.95109e-06	hypothetical protein
CNAG_06708	269.963	0.810994	1.75442	0.153814	5.27255	1.34539e-07	1.95542e-06	dCMP deaminase
CNAG_00750	599.49	-0.675479	0.626124	0.12824	-5.26731	1.38441e-07	2.00072e-06	hypothetical protein
CNAG_01862	262.871	1.14922	2.21793	0.218515	5.25921	1.44679e-07	2.08299e-06	hexose transporter
CNAG_01906	873.772	-1.10583	0.464635	0.211475	-5.22913	1.70306e-07	2.43818e-06	mitochondrial distribution and morphology protein12
CNAG_04437	1439.99	-0.653544	0.635717	0.125121	-5.22328	1.75778e-07	2.51181e-06	nicotinamide riboside kinase
CNAG_04385	29.5105	2.5345	5.79374	0.486464	5.21003	1.88807e-07	2.68295e-06	hypothetical protein
CNAG_00443	383.67	0.657474	1.57732	0.126738	5.18766	2.12956e-07	3.00377e-06	hypothetical protein
CNAG_04209	16647.8	1.19753	2.29347	0.231109	5.1817	2.19877e-07	3.09e-06	voltage-gated potassium channel protein beta-2subunit
CNAG_03829	4157.88	0.598656	1.51431	0.115611	5.1782	2.24039e-07	3.13695e-06	L-carnitine dehydratase/bile acid-inducible proteinF
CNAG_06817	1008.2	0.73032	1.65901	0.141102	5.17584	2.26888e-07	3.17104e-06	NCS2 family nucleobase:cation symporter-2
CNAG_04154	124.377	1.38706	2.61545	0.268143	5.17282	2.30587e-07	3.21686e-06	hypothetical protein
CNAG_02479	918.047	0.894966	1.85957	0.173241	5.16601	2.39146e-07	3.3181e-06	monosaccharide transporter
CNAG_01194	199.591	1.01635	2.02279	0.19698	5.15967	2.47391e-07	3.42008e-06	hypothetical protein
CNAG_02881	2189.08	0.880583	1.84112	0.170694	5.15884	2.48486e-07	3.42902e-06	cytidine deaminase
CNAG_00971	1086.22	0.655312	1.57496	0.12712	5.15508	2.53516e-07	3.49213e-06	vacuolar fusion protein MON1
CNAG_05519	456.817	0.69914	1.62354	0.135683	5.15274	2.56708e-07	3.52974e-06	hypothetical protein
CNAG_05078	8933.93	-0.699724	0.61569	0.136102	-5.14116	2.7304e-07	3.74085e-06	tRNA '-O-ribosylphosphate transferase, variant 2
CNAG_00378	369.368	-0.965918	0.511952	0.188118	-5.13465	2.82672e-07	3.86588e-06	hypothetical protein
CNAG_02118	3513.2	0.817078	1.76183	0.159148	5.13407	2.8355e-07	3.87096e-06	hypothetical protein
CNAG_01487	288.876	0.860274	1.81538	0.167676	5.13056	2.88883e-07	3.93674e-06	hypothetical protein
CNAG_08000	1419.42	0.696368	1.62042	0.135952	5.12218	3.0203e-07	4.08856e-06	hypothetical protein
CNAG_04766	289.257	1.09714	2.1393	0.214198	5.12209	3.02163e-07	4.08856e-06	hypothetical protein
CNAG_04346	2878.2	0.620807	1.53774	0.121593	5.10561	3.29727e-07	4.44578e-06	dihydrodipicolinate synthase
CNAG_02054	1928.03	1.10315	2.14824	0.216245	5.1014	3.37147e-07	4.53783e-06	hypothetical protein
CNAG_06092	27396.9	-1.2625	0.416822	0.247674	-5.09741	3.44332e-07	4.62639e-06	cyclin
CNAG_04616	1423.03	-0.598953	0.660233	0.117591	-5.09354	3.51448e-07	4.71372e-06	hypothetical protein
CNAG_00585	450.374	1.0259	2.03623	0.201542	5.09024	3.57602e-07	4.78786e-06	hypothetical protein
CNAG_05467	53.7548	2.91387	7.53637	0.572544	5.08934	3.59313e-07	4.80235e-06	hypothetical protein
CNAG_04201	382.409	0.897995	1.86347	0.176569	5.08579	3.66104e-07	4.88459e-06	hypothetical protein
CNAG_06202	266.633	0.946499	1.92719	0.186817	5.06644	4.05329e-07	5.35188e-06	hypothetical protein
CNAG_02670	1049.32	0.598283	1.51391	0.118433	5.05167	4.37963e-07	5.77281e-06	bud emergence protein 1
CNAG_05545	1249.97	-0.633017	0.644826	0.125321	-5.05118	4.39087e-07	5.77766e-06	bis(5'-adenosyl)-triphosphatase
CNAG_07862	7446.72	0.628753	1.54623	0.124797	5.03821	4.69913e-07	6.16207e-06	fumarate reductase
CNAG_05016	458.169	1.13579	2.19738	0.225552	5.03558	4.76402e-07	6.23647e-06	hypothetical protein
CNAG_00030	558.653	1.27093	2.41318	0.252556	5.03227	4.84698e-07	6.33422e-06	D-3-phosphoglycerate dehydrogenase, variant
CNAG_01995	307.423	-1.61015	0.327565	0.320809	-5.01903	5.19327e-07	6.75188e-06	hypothetical protein
CNAG_05721	7045.9	0.619209	1.53603	0.12338	5.01871	5.20191e-07	6.75188e-06	multifunctional beta-oxidation protein
CNAG_02528	4586.96	-0.641017	0.641261	0.12781	-5.0154	5.29237e-07	6.84866e-06	hypothetical protein
CNAG_03519	1118.94	1.05554	2.0785	0.210604	5.01198	5.3873e-07	6.95708e-06	cytoplasmic protein, variant 1
CNAG_01639	2404.56	-0.627172	0.647444	0.125346	-5.00351	5.62952e-07	7.2454e-06	elongation factor G, mitochondrial
CNAG_02875	1812.1	0.734237	1.66352	0.147035	4.99363	5.92539e-07	7.6006e-06	hypothetical protein
CNAG_03145	115.337	1.20617	2.30724	0.242134	4.98142	6.31189e-07	8.05583e-06	hypothetical protein
CNAG_06188	1308.6	0.885473	1.84737	0.178015	4.97415	6.55346e-07	8.3502e-06	hypothetical protein
CNAG_01120	29762.6	-0.809354	0.570637	0.162942	-4.96713	6.79498e-07	8.62917e-06	pyruvate dehydrogenase complex dihydrolipoamideacetyltransferase
CNAG_02984	924.327	0.710908	1.63683	0.143137	4.96661	6.81329e-07	8.63808e-06	sarcosine oxidase
CNAG_02323	1994.78	0.586579	1.50168	0.118692	4.94203	7.73141e-07	9.7375e-06	hypothetical protein
CNAG_02438	1149.31	-0.633774	0.644488	0.128282	-4.94046	7.79401e-07	9.8002e-06	hypothetical protein
CNAG_07407	131.316	1.3067	2.47376	0.264866	4.93345	8.07884e-07	1.01257e-05	fungal mating-type pheromone
CNAG_02764	1340.15	0.831415	1.77943	0.168546	4.93288	8.10258e-07	1.01257e-05	ATP-binding cassette, subfamily D (ALD),peroxisomal long-chain fatty acid import protein
CNAG_03713	570.029	0.835782	1.78482	0.169715	4.92462	8.45254e-07	1.04902e-05	efflux protein EncT
CNAG_04025	6460.44	0.676732	1.59851	0.13764	4.91667	8.80296e-07	1.08897e-05	transaldolase
CNAG_06574	16206.8	-0.692604	0.618736	0.140913	-4.91513	8.87248e-07	1.0958e-05	antiphagocytic protein 1
CNAG_07700	96.1067	1.55577	2.9399	0.317006	4.9077	9.21529e-07	1.1363e-05	hypothetical protein
CNAG_05255	3555.18	-0.722655	0.605981	0.147535	-4.8982	9.67185e-07	1.19068e-05	hypothetical protein
CNAG_02600	196.793	1.39794	2.63525	0.285663	4.89366	9.89755e-07	1.21651e-05	tartrate transporter
CNAG_07855	6657.74	-0.596169	0.661508	0.121889	-4.89108	1.00282e-06	1.23059e-05	midasin
CNAG_04126	238.614	1.23528	2.35427	0.252808	4.88622	1.0279e-06	1.25934e-05	hypothetical protein
CNAG_06324	458.207	0.829342	1.77687	0.169832	4.88331	1.04318e-06	1.27602e-05	zinc finger protein
CNAG_03313	198.801	0.816973	1.76171	0.167648	4.87313	1.09842e-06	1.33747e-05	hypothetical protein, variant
CNAG_03487	744.611	0.942555	1.92193	0.193554	4.86972	1.11757e-06	1.35832e-05	DNAJ domain-containing protein
CNAG_06658	1554.39	-0.648087	0.638126	0.133473	-4.85557	1.20039e-06	1.44976e-05	rhomboid family membrane protein
CNAG_01048	1602.25	-0.797019	0.575537	0.164313	-4.8506	1.23086e-06	1.48422e-05	hypothetical protein, variant
CNAG_00452	580.853	0.949501	1.9312	0.195889	4.84713	1.25261e-06	1.50541e-05	isovaleryl-CoA dehydrogenase
CNAG_07779	493.959	0.645737	1.56454	0.13348	4.83771	1.31343e-06	1.55919e-05	D-glycerate 3-kinase
CNAG_04342	928.146	-0.791865	0.577597	0.163942	-4.83014	1.36434e-06	1.61711e-05	hypothetical protein
CNAG_03546	386.444	-0.663687	0.631263	0.137475	-4.8277	1.38118e-06	1.63453e-05	hypothetical protein
CNAG_06680	2014.79	-0.614745	0.653045	0.127355	-4.82703	1.38588e-06	1.63756e-05	COP9 signalosome complex subunit 6
CNAG_05771	4545.61	-0.743707	0.597203	0.154402	-4.81671	1.45944e-06	1.71389e-05	serine/threonine-protein kinase TEL1
CNAG_05590	12638.7	-0.629526	0.646389	0.131394	-4.79114	1.65836e-06	1.93265e-05	hypothetical protein
CNAG_04230	936.563	1.28195	2.43167	0.267858	4.78594	1.70191e-06	1.98038e-05	hydroxyethylthiazole kinase
CNAG_05429	358.139	1.05627	2.07954	0.221116	4.77698	1.7795e-06	2.06439e-05	hypothetical protein
CNAG_04743	6635.88	-0.616841	0.652097	0.129192	-4.77459	1.80073e-06	2.08585e-05	oligosaccharyltransferase complex subunit beta
CNAG_02533	1139.37	-0.952696	0.516666	0.200346	-4.75525	1.98196e-06	2.28539e-05	hypothetical protein
CNAG_06587	1897.28	-0.791485	0.577749	0.166461	-4.75478	1.98667e-06	2.28736e-05	cytoplasmic protein
CNAG_01647	3954.14	-0.632093	0.64524	0.132967	-4.75376	1.99664e-06	2.29538e-05	translocation protein SEC66
CNAG_02888	1090.14	0.802547	1.74418	0.169577	4.73265	2.21608e-06	2.52112e-05	gamma-glutamyltransferase
CNAG_02064	8264.23	0.633729	1.55157	0.133928	4.73185	2.2248e-06	2.52728e-05	TATA-box-binding protein-associated factor
CNAG_02697	1725.28	0.646818	1.56571	0.136872	4.72572	2.29306e-06	2.60095e-05	hypothetical protein
CNAG_05766	553.913	1.28854	2.4428	0.273109	4.71803	2.38138e-06	2.69713e-05	endoglucanase C
CNAG_05305	94.608	1.74653	3.35551	0.370411	4.71512	2.41573e-06	2.73199e-05	hypothetical protein
CNAG_05065	19.0857	5.7472	53.7131	1.21898	4.71474	2.42014e-06	2.73293e-05	hypothetical protein
CNAG_04742	775.25	0.617692	1.53442	0.131213	4.70754	2.50724e-06	2.8188e-05	DNA primase large subunit
CNAG_07802	2909.53	0.650751	1.56999	0.138334	4.70419	2.54879e-06	2.85293e-05	class III aminotransferase
CNAG_06437	864.124	-0.808221	0.571086	0.172261	-4.69185	2.70751e-06	3.02174e-05	hypothetical protein
CNAG_03086	2126.59	-0.739181	0.59908	0.157563	-4.69133	2.71437e-06	3.02498e-05	hypothetical protein
CNAG_04760	4917.25	0.821747	1.76754	0.175393	4.68516	2.79737e-06	3.11293e-05	cytoplasmic protein
CNAG_02333	453.278	0.632353	1.55009	0.135044	4.68259	2.83276e-06	3.14317e-05	hypothetical protein
CNAG_06926	588.532	0.647818	1.5668	0.138591	4.67431	2.9494e-06	3.2584e-05	hypothetical protein
CNAG_00366	245.226	1.10338	2.14858	0.23616	4.67218	2.98021e-06	3.28769e-05	hypothetical protein
CNAG_07176	177.044	1.64735	3.13257	0.353379	4.6617	3.13608e-06	3.43486e-05	hypothetical protein
CNAG_07620	15.6196	2.98386	7.911	0.640156	4.66114	3.14455e-06	3.43921e-05	hypothetical protein
CNAG_05659	42.2289	2.2606	4.7919	0.485269	4.65844	3.18615e-06	3.47973e-05	hypothetical protein
CNAG_07789	16.4313	2.91552	7.54501	0.626108	4.65658	3.21502e-06	3.50625e-05	hypothetical protein
CNAG_02784	1555.26	0.622305	1.53933	0.133656	4.65601	3.22391e-06	3.51094e-05	methyltransferase
CNAG_03132	130.113	1.937	3.82908	0.416052	4.65566	3.22944e-06	3.51196e-05	hypothetical protein
CNAG_04415	1330.7	0.983376	1.97709	0.211736	4.64434	3.41167e-06	3.68393e-05	oxidoreductase
CNAG_01991	25760.5	-0.587351	0.665564	0.126484	-4.64367	3.42273e-06	3.69066e-05	cytochrome c oxidase subunit 4
CNAG_06890	538.691	-0.728553	0.603509	0.157113	-4.63712	3.53295e-06	3.79879e-05	membrane transporter
CNAG_06419	1023.01	0.8998	1.86581	0.194103	4.63569	3.55753e-06	3.81984e-05	hypothetical protein
CNAG_00133	754.889	0.81148	1.75501	0.175305	4.62896	3.67509e-06	3.94055e-05	hypothetical protein
CNAG_04096	1474.96	0.79146	1.73083	0.171172	4.62377	3.76827e-06	4.0201e-05	racemase
CNAG_04916	452.9	0.983	1.97657	0.21269	4.62174	3.80533e-06	4.05178e-05	hypothetical protein
CNAG_03033	2257.19	0.731636	1.66052	0.158624	4.6124	3.98049e-06	4.20316e-05	hypothetical protein
CNAG_00840	404.262	0.749142	1.68079	0.16244	4.61181	3.99169e-06	4.20917e-05	hypothetical protein
CNAG_03708	3350.84	-0.749236	0.594918	0.162476	-4.61138	4.00007e-06	4.21219e-05	signal recognition particle subunit SRP72
CNAG_00501	198.93	1.10145	2.1457	0.238976	4.60904	4.0453e-06	4.24812e-05	hypothetical protein
CNAG_00397	742.331	0.868948	1.82633	0.188628	4.60667	4.09177e-06	4.28923e-05	2-oxoisovalerate dehydrogenase E1 component, betasubunit
CNAG_07489	10935.6	-0.729234	0.603224	0.158312	-4.60631	4.09874e-06	4.28923e-05	hypothetical protein
CNAG_04016	1259.45	1.29605	2.45555	0.282759	4.58357	4.57097e-06	4.75443e-05	hypothetical protein
CNAG_00166	1295.19	0.771406	1.70693	0.168394	4.58095	4.62863e-06	4.80134e-05	ATP-dependent RNA helicase DBP8
CNAG_06801	1663.5	-0.639155	0.642089	0.140166	-4.55998	5.11574e-06	5.26378e-05	hypothetical protein
CNAG_05542	31.5028	1.99071	3.97434	0.437604	4.54912	5.3871e-06	5.51331e-05	hypothetical protein
CNAG_02056	1222.65	0.770337	1.70567	0.169551	4.54338	5.53587e-06	5.63538e-05	hypothetical protein
CNAG_05461	505.661	0.826173	1.77298	0.181979	4.53994	5.62708e-06	5.72062e-05	L-lactate dehydrogenase (cytochrome)
CNAG_04696	756.268	-0.643963	0.639953	0.141911	-4.5378	5.68448e-06	5.76364e-05	DNA clamp loader
CNAG_03618	4339.96	0.741708	1.67215	0.163601	4.53364	5.79755e-06	5.86274e-05	NADPH2:quinone reductase
CNAG_05666	173.693	0.800577	1.7418	0.176829	4.52741	5.97097e-06	5.99852e-05	hypothetical protein
CNAG_00077	20316.4	-0.710304	0.611191	0.15689	-4.52741	5.97105e-06	5.99852e-05	solute carrier family 26 (sodium-independentsulfate anion transporter), member 11
CNAG_01302	2830.24	-0.833668	0.561101	0.184193	-4.52606	6.00932e-06	6.02904e-05	hypothetical protein
CNAG_00707	3502.65	0.774188	1.71023	0.171434	4.51594	6.30362e-06	6.30774e-05	protein SYM1
CNAG_04247	849.795	0.607019	1.52311	0.134713	4.50601	6.60591e-06	6.59297e-05	hypothetical protein
CNAG_02735	390.909	1.26047	2.39573	0.279764	4.50546	6.62303e-06	6.60051e-05	hypothetical protein
CNAG_07730	123.801	1.40724	2.6523	0.312962	4.49652	6.90744e-06	6.84921e-05	tricarboxylate transporter
CNAG_00547	6019.33	-0.825407	0.564323	0.183699	-4.49327	7.01389e-06	6.94575e-05	hypothetical protein
CNAG_00936	3353.4	0.695175	1.61908	0.154858	4.4891	7.15232e-06	7.05541e-05	lipid particle protein
CNAG_05243	2907.3	0.606146	1.52219	0.13512	4.48598	7.25809e-06	7.12355e-05	xylulokinase
CNAG_00975	378.632	1.10214	2.14673	0.245686	4.48596	7.25866e-06	7.12355e-05	hypothetical protein
CNAG_06724	1302.39	0.980881	1.97367	0.218762	4.48379	7.3328e-06	7.18708e-05	DNA repair and recombination protein RAD52
CNAG_00843	1405.14	-0.758942	0.590929	0.16935	-4.48149	7.4123e-06	7.24642e-05	salicylate hydroxylase
CNAG_03906	581.351	0.704315	1.62937	0.157298	4.47758	7.54944e-06	7.36167e-05	hypothetical protein
CNAG_05381	249.549	0.931779	1.90763	0.209063	4.45693	8.31417e-06	8.056e-05	MFS transporter, SP family, solute carrier family 2(myo-inositol transporter), member 13
CNAG_03421	216.562	1.00301	2.00418	0.225911	4.43985	9.00218e-06	8.70059e-05	hypothetical protein
CNAG_06498	4230.23	-0.668357	0.629223	0.150643	-4.4367	9.135e-06	8.80669e-05	hypothetical protein
CNAG_03716	1641.32	-1.45923	0.363688	0.329518	-4.42836	9.49505e-06	9.14227e-05	hypothetical protein
CNAG_03051	2730.67	0.964691	1.95165	0.217882	4.42759	9.52907e-06	9.16349e-05	polyamine transporter
CNAG_05508	184.931	0.889967	1.85313	0.201204	4.42321	9.72472e-06	9.32816e-05	hypothetical protein
CNAG_00757	5279.45	-0.641192	0.641183	0.145222	-4.41525	1.00892e-05	9.66565e-05	ubiquitin carboxyl-terminal hydrolase 8
CNAG_05099	48.2671	3.25721	9.56132	0.737787	4.41483	1.01087e-05	9.67223e-05	hypothetical protein
CNAG_00728	1319.68	0.807941	1.75071	0.183522	4.40241	1.07056e-05	0.00010167	dityrosine transporter
CNAG_04960	376.484	0.865707	1.82223	0.196691	4.40135	1.07581e-05	0.000102041	hypothetical protein
CNAG_05336	3972.78	-0.622108	0.649721	0.141644	-4.39204	1.12291e-05	0.000106336	glucose transporter, variant 2
CNAG_05187	4882.18	-0.74659	0.59601	0.170021	-4.39116	1.12746e-05	0.000106545	hypothetical protein
CNAG_03085	47.9944	1.73745	3.33444	0.395771	4.39003	1.13337e-05	0.00010697	hypothetical protein
CNAG_01975	1395.92	0.708272	1.63385	0.162177	4.36729	1.25798e-05	0.000118003	helicase
CNAG_07967	2080.06	-1.02428	0.491657	0.234982	-4.35895	1.30688e-05	0.00012229	hypothetical protein
CNAG_04060	169.663	-1.18375	0.440206	0.271921	-4.35329	1.34112e-05	0.000125188	hypothetical protein
CNAG_02491	194.878	1.08297	2.11839	0.248831	4.35222	1.34769e-05	0.000125647	nuclear protein
CNAG_04030	498.721	-0.695658	0.617428	0.159906	-4.35041	1.35881e-05	0.000126529	hypothetical protein
CNAG_07651	1191.59	-0.976412	0.508242	0.224514	-4.349	1.3676e-05	0.000127193	DEAD-box ATP-dependent RNA helicase 26
CNAG_00781	669.065	-0.616127	0.65242	0.141844	-4.34368	1.40117e-05	0.000129999	U6 snRNA-associated Sm-like protein LSm3
CNAG_01293	2085.68	0.585754	1.50082	0.135059	4.33702	1.44426e-05	0.000133511	hypothetical protein
CNAG_02703	2091.88	-0.722299	0.606131	0.166668	-4.33377	1.46581e-05	0.000135339	hypothetical protein
CNAG_04258	488.981	-0.844293	0.556984	0.195282	-4.32346	1.53604e-05	0.000141312	arf/Sar family protein
CNAG_00681	1623.64	0.726251	1.65433	0.167992	4.32313	1.5383e-05	0.00014135	condensin complex subunit 3, variant
CNAG_05739	4820.5	0.935665	1.91277	0.216969	4.31243	1.61468e-05	0.00014713	hypothetical protein
CNAG_07592	155.625	0.886306	1.84844	0.20568	4.30916	1.63875e-05	0.000149146	hypothetical protein
CNAG_01150	108290	-0.753199	0.593286	0.174875	-4.30707	1.65433e-05	0.000150385	omega-6 fatty acid desaturase (delta-12desaturase)
CNAG_01901	258.584	1.00683	2.0095	0.234393	4.29549	1.7431e-05	0.000157238	hypothetical protein
CNAG_07709	25.9854	1.88774	3.70055	0.439868	4.29161	1.77385e-05	0.000158981	hypothetical protein
CNAG_01171	140.276	1.02857	2.04001	0.240039	4.28503	1.82717e-05	0.000163186	hypothetical protein
CNAG_03817	769.827	0.856116	1.81016	0.200195	4.27642	1.89925e-05	0.000169426	cell growth-regulating nucleolar protein
CNAG_00085	501.367	0.645012	1.56375	0.151001	4.27156	1.9411e-05	0.000172555	histone chaperone ASF1
CNAG_02000	10681.7	0.601848	1.51766	0.140953	4.26986	1.95597e-05	0.000173473	short-chain dehydrogenase
CNAG_05989	1248.39	-0.652938	0.635984	0.153306	-4.25906	2.05289e-05	0.000181438	hypothetical protein
CNAG_03910	2129.37	-0.902332	0.535021	0.21191	-4.2581	2.06175e-05	0.00018201	D-xylose-proton symporter
CNAG_05869	198.688	0.858351	1.81296	0.201934	4.25065	2.13147e-05	0.0001873	endopeptidase
CNAG_07412	51.1485	1.52787	2.8836	0.360459	4.23868	2.24837e-05	0.000197119	hypothetical protein
CNAG_03312	285.798	0.62894	1.54643	0.148418	4.23763	2.2589e-05	0.000197589	hypothetical protein
CNAG_06924	8979.33	-0.688432	0.620528	0.162699	-4.23133	2.32313e-05	0.000202052	beta-fructofuranosidase
CNAG_06003	133.361	1.19156	2.28399	0.281877	4.22722	2.36592e-05	0.000205306	hypothetical protein
CNAG_07461	23.4253	2.33513	5.04597	0.552658	4.22528	2.38649e-05	0.000206856	hypothetical protein
CNAG_06916	1109.95	0.604549	1.5205	0.143351	4.21727	2.47283e-05	0.000213372	hypothetical protein
CNAG_02758	708.022	0.782094	1.71963	0.185603	4.21379	2.5112e-05	0.000215952	NADH:flavin oxidoreductase/NADH oxidase
CNAG_05855	5897.38	-0.61192	0.654325	0.145395	-4.20869	2.5686e-05	0.000220255	hypothetical protein
CNAG_02903	3901.45	1.19257	2.28559	0.283524	4.20624	2.59659e-05	0.000222295	alcohol dehydrogenase (NADP )
CNAG_00144	1095.74	0.897583	1.86294	0.213544	4.20327	2.6309e-05	0.000224729	hypothetical protein
CNAG_04059	142.027	-0.903454	0.534605	0.215402	-4.19428	2.73744e-05	0.000233568	hypothetical protein
CNAG_03436	2474.95	0.850378	1.80297	0.203006	4.18893	2.80272e-05	0.000238606	alanine transaminase
CNAG_02578	1329.23	1.20058	2.29833	0.287455	4.1766	2.95905e-05	0.000251076	thyroid hormone receptor interactor 13
CNAG_06431	3052.77	0.885323	1.84718	0.212155	4.17301	3.00605e-05	0.000254781	acyl-CoA oxidase
CNAG_01843	7895.21	-0.868957	0.547543	0.208739	-4.16288	3.14261e-05	0.000265766	elongation factor Ts, mitochondrial
CNAG_06976	160.413	2.16358	4.48026	0.521454	4.14913	3.33742e-05	0.00028038	ferric-chelate reductase
CNAG_04934	5738	0.923325	1.89648	0.222847	4.14332	3.42312e-05	0.000286635	hypothetical protein
CNAG_04308	3297.78	0.603587	1.51949	0.145999	4.1342	3.56196e-05	0.00029696	3-hydroxyacyl-CoA dehydrogenase
CNAG_06463	54.2129	1.40131	2.64141	0.339052	4.13301	3.58037e-05	0.000298169	hypothetical protein
CNAG_01620	866.642	0.598674	1.51432	0.144873	4.13241	3.58979e-05	0.000298423	hypothetical protein
CNAG_04098	25154.6	-0.675953	0.625919	0.163577	-4.13232	3.59123e-05	0.000298423	ATP-binding cassette, subfamily G (WHITE), member2, PDR
CNAG_01229	1565.54	0.613928	1.53042	0.148875	4.12378	3.72701e-05	0.000309034	L-mandelate dehydrogenase
CNAG_03902	12510.4	-0.727524	0.603939	0.176673	-4.11792	3.82313e-05	0.000316318	transcriptional regulatory protein
CNAG_02188	4271.39	-1.01608	0.494459	0.246793	-4.11712	3.83637e-05	0.000317071	hypothetical protein
CNAG_00192	860.258	0.701283	1.62595	0.170404	4.11541	3.86499e-05	0.000318802	hypothetical protein
CNAG_06516	330.638	1.19339	2.28689	0.289984	4.11537	3.86566e-05	0.000318802	hypothetical protein
CNAG_06348	2198.91	0.749491	1.6812	0.182437	4.10823	3.98708e-05	0.000328108	ABC transporter PMR5
CNAG_02053	612.49	0.741063	1.67141	0.180426	4.1073	4.00311e-05	0.000329073	hypothetical protein
CNAG_03491	118.187	1.01808	2.02523	0.247981	4.10549	4.03463e-05	0.000331308	cleavage and polyadenylation specificity factorsubunit 5
CNAG_05089	58.5535	-1.38399	0.383158	0.337146	-4.10502	4.04283e-05	0.000331625	hypothetical protein
CNAG_07986	388.001	0.590653	1.50593	0.144121	4.09832	4.16158e-05	0.00034027	hypothetical protein
CNAG_01675	1820.13	1.05511	2.07788	0.258022	4.08923	4.32813e-05	0.000352757	tagatose-bisphosphate aldolase
CNAG_06000	16569.9	-0.93222	0.524051	0.228086	-4.08714	4.36721e-05	0.000355185	glycoprotein
CNAG_07421	253.244	0.91815	1.88969	0.224661	4.08683	4.37307e-05	0.000355283	hypothetical protein
CNAG_02586	300.056	1.09014	2.12894	0.267565	4.07429	4.6154e-05	0.000372989	sugar transporter
CNAG_03477	1786.31	-0.708671	0.611884	0.174478	-4.06166	4.87248e-05	0.000390298	hypothetical protein
CNAG_01139	168.314	0.925472	1.89931	0.227864	4.06151	4.87553e-05	0.000390298	hypothetical protein
CNAG_00242	81.7721	1.80867	3.5032	0.446622	4.04967	5.12893e-05	0.00040887	hypothetical protein
CNAG_00023	1046.3	-0.758176	0.591243	0.187361	-4.0466	5.19671e-05	0.000413842	hypothetical protein
CNAG_01359	3184.17	0.637389	1.55551	0.157833	4.03839	5.38204e-05	0.00042638	DNA-directed RNA polymerase II subunit RPB7
CNAG_07923	600.949	-0.609574	0.65539	0.151162	-4.03259	5.5166e-05	0.000435686	hypothetical protein
CNAG_00060	1958.27	0.596653	1.5122	0.14827	4.0241	5.71924e-05	0.000448908	chaperone regulator
CNAG_06172	368.454	0.810962	1.75438	0.201586	4.02292	5.74822e-05	0.00045072	transketolase
CNAG_05605	543.166	0.788099	1.7268	0.196193	4.01695	5.89551e-05	0.000461322	DEAD box family helicase
CNAG_05819	738.612	-0.856378	0.552338	0.213223	-4.01635	5.91062e-05	0.000462031	hypothetical protein
CNAG_01527	409.239	0.676317	1.59805	0.169132	3.99876	6.36763e-05	0.000493718	hypothetical protein
CNAG_01358	49.7599	2.08742	4.24989	0.522274	3.9968	6.42054e-05	0.00049631	hypothetical protein
CNAG_05181	4742.02	-0.888652	0.540119	0.222474	-3.9944	6.4858e-05	0.000498833	white collar 1 protein
CNAG_01264	6083.92	1.03926	2.05518	0.260471	3.98993	6.60914e-05	0.00050732	homoisocitrate dehydrogenase
CNAG_04732	3267.67	-0.728824	0.603395	0.182666	-3.98992	6.60943e-05	0.00050732	hypothetical protein
CNAG_05528	85.1078	1.07311	2.10397	0.269048	3.98855	6.64796e-05	0.000509766	hypothetical protein
CNAG_05873	3311.37	-0.936095	0.522646	0.234837	-3.98615	6.71553e-05	0.000513916	hypothetical protein
CNAG_04795	2251.94	0.741796	1.67226	0.186157	3.98478	6.75435e-05	0.00051637	adenine nucleotide transporter
CNAG_02917	1842.53	1.2253	2.33805	0.308022	3.97797	6.95051e-05	0.000529777	hypothetical protein
CNAG_07710	267.181	-0.588918	0.664841	0.148167	-3.97469	7.0471e-05	0.000536605	hypothetical protein
CNAG_06596	301.568	0.753596	1.68599	0.190023	3.9658	7.31491e-05	0.000555337	hypothetical protein
CNAG_06249	1829.22	-0.930589	0.524644	0.234685	-3.96527	7.33114e-05	0.000556018	taurine catabolism dioxygenase TauD
CNAG_06096	5913.35	0.902481	1.86928	0.22764	3.96451	7.35454e-05	0.000556687	tricarboxylate carrier
CNAG_04890	58.1156	1.22953	2.34491	0.310162	3.96417	7.36521e-05	0.000556944	hypothetical protein
CNAG_01429	399.995	-0.966372	0.511792	0.244269	-3.95617	7.61595e-05	0.000575335	hypothetical protein
CNAG_05915	14240.5	-1.18063	0.441159	0.300569	-3.92798	8.56618e-05	0.000642043	hypothetical protein
CNAG_07425	156.867	1.00973	2.01354	0.257697	3.9183	8.91758e-05	0.000665073	hypothetical protein
CNAG_03044	378.463	0.931354	1.90706	0.238525	3.90463	9.43682e-05	0.00070163	hypothetical protein, variant
CNAG_06331	802.688	0.771825	1.70743	0.198087	3.8964	9.76323e-05	0.000723255	hypothetical protein
CNAG_02066	358.757	0.73915	1.66919	0.190051	3.88921	0.000100571	0.00074358	hypothetical protein
CNAG_05448	38.8053	2.27698	4.84662	0.585874	3.88646	0.000101715	0.000749867	hypothetical protein
CNAG_07824	476.685	0.59129	1.50659	0.15256	3.87579	0.000106281	0.000779765	hypothetical protein
CNAG_05021	205.069	0.940977	1.91983	0.242904	3.87387	0.000107122	0.000785186	hypothetical protein, variant
CNAG_00078	2105.29	0.672417	1.59374	0.173698	3.87119	0.000108305	0.000793096	vacuolar protein
CNAG_04047	728.878	0.833855	1.78244	0.215475	3.86985	0.000108904	0.000796721	hypothetical protein, variant
CNAG_03259	102.451	0.907468	1.87575	0.234659	3.86719	0.000110098	0.000804686	hypothetical protein
CNAG_06598	53.1594	1.41309	2.66308	0.365665	3.86445	0.000111339	0.000812198	hypothetical protein, variant
CNAG_04508	111.935	0.947091	1.92798	0.245267	3.86147	0.000112707	0.000821394	hypothetical protein
CNAG_02713	185.945	-0.828981	0.562927	0.21507	-3.85447	0.000115981	0.000843647	hypothetical protein
CNAG_05045	390.175	0.681612	1.60393	0.177134	3.84801	0.000119082	0.000864563	hypothetical protein
CNAG_06915	287.663	0.632841	1.55062	0.164622	3.8442	0.000120949	0.000875619	hypothetical protein
CNAG_01116	1114.83	0.779892	1.717	0.203136	3.83926	0.000123405	0.000891714	beta-ketoacyl reductase
CNAG_01494	1615.16	-0.688033	0.620699	0.179237	-3.83868	0.000123697	0.00089298	hypothetical protein
CNAG_06949	2361.64	1.23042	2.34636	0.321315	3.82933	0.000128493	0.000922374	hypothetical protein
CNAG_05563	617.172	0.744319	1.67518	0.194428	3.82824	0.000129061	0.000925582	histone deacetylase HOS2
CNAG_07406	126.482	0.945837	1.92631	0.247131	3.82726	0.000129577	0.000927664	pheromone alpha
CNAG_01518	2551.49	0.61303	1.52947	0.160208	3.82646	0.000130002	0.000929713	phosphoglycerate mutase, variant
CNAG_07471	143.218	-0.974704	0.508844	0.255025	-3.82199	0.000132379	0.000945831	hypothetical protein
CNAG_00932	16323.7	0.791512	1.73089	0.207656	3.81164	0.000138048	0.000981748	hypothetical protein
CNAG_02154	1125.63	0.664386	1.58489	0.174709	3.80282	0.000143058	0.0010136	anaphase-promoting complex subunit 6
CNAG_03842	121.043	1.12762	2.18498	0.29775	3.78713	0.000152395	0.00107379	hypothetical protein
CNAG_04211	11799.5	-0.673207	0.627111	0.177803	-3.78624	0.000152943	0.00107665	nuclear RNA export factor 1/2
CNAG_02663	2194.15	-0.631188	0.645644	0.166769	-3.7848	0.000153832	0.00108192	ribonucleoside-diphosphate reductase subunit M2
CNAG_01244	141.268	1.12723	2.18439	0.298071	3.78176	0.000155724	0.00109221	hypothetical protein
CNAG_04551	122.961	0.989175	1.98505	0.261727	3.77941	0.000157202	0.00110056	hypothetical protein
CNAG_00306	2018.25	0.625841	1.54311	0.16572	3.7765	0.000159045	0.00111142	hypothetical protein
CNAG_02334	44.8491	1.58071	2.99117	0.418981	3.77275	0.000161459	0.00112521	hypothetical protein
CNAG_04330	90.6904	1.27993	2.42828	0.339668	3.76819	0.000164436	0.00114179	hypothetical protein
CNAG_06723	15877.5	-0.599064	0.660182	0.159254	-3.7617	0.000168765	0.00116836	succinate dehydrogenase (ubiquinone) membraneanchor subunit
CNAG_03999	3086.96	0.589671	1.5049	0.156762	3.76158	0.000168846	0.00116836	hypothetical protein
CNAG_03486	6168.81	-1.04052	0.486153	0.276621	-3.76154	0.000168873	0.00116836	peptidyl-prolyl cis-trans isomerase B
CNAG_04317	71.3323	1.2158	2.3227	0.324624	3.74526	0.000180207	0.00124004	hypothetical protein
CNAG_01038	2176.52	-0.704994	0.613445	0.188814	-3.73381	0.000188606	0.00128913	hypothetical protein
CNAG_02051	1242.1	0.627843	1.54525	0.168211	3.73247	0.000189615	0.00129314	kinesin family member 20/23
CNAG_06276	6236.58	-0.743114	0.597449	0.199149	-3.73145	0.000190382	0.00129625	hypothetical protein
CNAG_07666	897.351	0.69927	1.62368	0.187846	3.72258	0.000197201	0.0013389	hypothetical protein
CNAG_03323	3079.49	0.681528	1.60384	0.183241	3.7193	0.000199773	0.00135516	hypothetical protein
CNAG_04970	3599.68	-0.65633	0.63449	0.176913	-3.7099	0.000207338	0.00140274	hypothetical protein, variant 1
CNAG_04975	28.9476	1.65167	3.14197	0.445605	3.70658	0.000210078	0.00141627	hypothetical protein
CNAG_04857	51846.8	-0.746159	0.596189	0.201456	-3.70384	0.000212361	0.0014304	hypothetical protein
CNAG_04307	1726.52	0.788707	1.72752	0.213396	3.69598	0.000219038	0.00147019	urate oxidase
CNAG_04289	3614.98	-0.631894	0.645329	0.171613	-3.68209	0.000231326	0.00154318	hypothetical protein
CNAG_04993	1469.97	0.626951	1.5443	0.170296	3.68153	0.00023184	0.00154526	hypothetical protein
CNAG_04344	1387.86	1.12556	2.18186	0.306362	3.67394	0.000238838	0.00158775	galactonate dehydratase
CNAG_01491	2766.83	-0.819768	0.566533	0.2235	-3.66786	0.00024459	0.00162035	hypothetical protein
CNAG_07837	377.602	-0.640894	0.641316	0.175191	-3.65825	0.000253942	0.00167505	hypothetical protein
CNAG_07312	1005.68	-0.636659	0.643201	0.174099	-3.65688	0.000255303	0.00168113	hypothetical protein
CNAG_05968	53.7376	1.25905	2.39338	0.344491	3.65481	0.000257373	0.00169185	cell division control protein 42
CNAG_04506	95.0749	1.28368	2.43459	0.351659	3.65036	0.000261876	0.00171702	hypothetical protein
CNAG_02852	9278.85	-0.642481	0.64061	0.176179	-3.64674	0.000265584	0.00173686	4-aminobutyrate transaminase
CNAG_00851	3019.24	-1.02021	0.493046	0.279897	-3.64494	0.000267455	0.00174472	hypothetical protein
CNAG_00555	1826.14	0.836787	1.78607	0.229576	3.64492	0.000267471	0.00174472	hypothetical protein, variant
CNAG_02104	2867.57	-0.856412	0.552324	0.235008	-3.64418	0.000268251	0.00174832	phosphatidylinositol transfer protein SFH5
CNAG_06629	75.6275	1.18705	2.27686	0.326208	3.63894	0.000273766	0.00177669	hypothetical protein
CNAG_01113	922.075	-0.721342	0.606533	0.198282	-3.63795	0.000274812	0.00178196	hypothetical protein
CNAG_03037	549.321	0.632144	1.54987	0.1739	3.63511	0.000277866	0.00179872	hypothetical protein, variant
CNAG_05777	907.613	-0.625098	0.648376	0.172141	-3.63132	0.000281979	0.00182226	hypothetical protein
CNAG_03019	7735.16	0.59729	1.51287	0.164655	3.62753	0.00028615	0.00184609	long-chain acyl-CoA synthetase
CNAG_07443	217.369	1.33655	2.52546	0.369122	3.62088	0.0002936	0.00189096	hypothetical protein
CNAG_07491	2427.32	-1.06653	0.477467	0.295173	-3.61323	0.000302406	0.00193626	glutaredoxin
CNAG_04536	191.286	0.628336	1.54578	0.174685	3.59697	0.00032195	0.00205109	nicotinamide mononucleotide permease
CNAG_04880	1046.16	-0.639052	0.642135	0.177755	-3.59513	0.000324226	0.00206387	hypothetical protein
CNAG_03419	1258.95	-0.79432	0.576615	0.221311	-3.58915	0.000331754	0.00210653	ATP-dependent RNA helicase DDX41
CNAG_00495	734.1	-0.744915	0.596703	0.207647	-3.5874	0.000333989	0.0021172	hypothetical protein
CNAG_04873	1077.74	0.8273	1.77436	0.230919	3.58265	0.000340131	0.00215257	hypothetical protein
CNAG_05595	11171.1	-0.984063	0.505554	0.274834	-3.58057	0.00034284	0.00216792	hypothetical protein
CNAG_00783	1536.76	-0.616826	0.652104	0.172331	-3.57931	0.000344505	0.00217665	hypothetical protein
CNAG_00849	1705.11	1.03481	2.04885	0.289445	3.57516	0.000350016	0.00220418	hypothetical protein
CNAG_05785	1035.33	-0.585091	0.666607	0.163712	-3.5739	0.0003517	0.00221296	hypothetical protein
CNAG_05670	12.754	4.11424	17.3185	1.15745	3.55456	0.000378619	0.00235328	hypothetical protein
CNAG_07908	818.412	0.728558	1.65698	0.205023	3.55355	0.000380069	0.00236038	aconitate hydratase, mitochondrial
CNAG_06180	3569.78	-0.611251	0.654629	0.17213	-3.55109	0.000383636	0.0023806	NADH dehydrogenase (ubiquinone) Fe-S protein 4
CNAG_04087	212.023	0.884813	1.84653	0.249714	3.5433	0.000395145	0.00243817	hypothetical protein
CNAG_00710	2517.47	0.76386	1.69803	0.215778	3.54003	0.000400082	0.00246465	glutamine synthetase
CNAG_00323	292.31	0.843445	1.79433	0.238732	3.53302	0.000410834	0.00252885	hypothetical protein
CNAG_02089	1103.1	-0.595718	0.661715	0.168631	-3.53267	0.000411389	0.00253023	hypothetical protein
CNAG_06062	581.786	0.724466	1.65229	0.205171	3.53103	0.000413942	0.00254183	hypothetical protein
CNAG_02882	1734.12	-0.872672	0.546134	0.247168	-3.53068	0.000414486	0.00254313	hypothetical protein
CNAG_04413	67.7054	1.35114	2.55115	0.382793	3.5297	0.000416036	0.00254968	hypothetical protein
CNAG_04897	854.717	-0.620387	0.650496	0.175768	-3.52958	0.000416219	0.00254968	hypothetical protein
CNAG_02342	1584.55	-0.605851	0.657084	0.171686	-3.52883	0.000417402	0.00255283	hypothetical protein
CNAG_04797	4887.82	-0.640565	0.641462	0.182044	-3.51874	0.000433594	0.00264551	signal recognition particle subunit SRP19
CNAG_02685	65663.9	-0.953387	0.516419	0.271894	-3.50647	0.000454098	0.00275741	hypothetical protein
CNAG_00190	9738.28	-0.629678	0.646321	0.179607	-3.50587	0.000455123	0.00276144	hypothetical protein
CNAG_00355	5100.82	-0.926268	0.526218	0.264478	-3.50225	0.000461353	0.00279481	hypothetical protein
CNAG_03079	3854.66	-0.864652	0.549179	0.24713	-3.49877	0.000467404	0.00282698	hypothetical protein
CNAG_01201	410.055	0.616385	1.53303	0.176368	3.49489	0.000474259	0.00286391	hypothetical protein
CNAG_00687	863.13	0.701592	1.6263	0.200845	3.49321	0.00047725	0.0028797	hypothetical protein, variant
CNAG_00706	637.452	0.693916	1.61767	0.198733	3.4917	0.000479958	0.00289376	RNA-binding protein rnp24
CNAG_01525	1737.38	0.804818	1.74692	0.230627	3.48969	0.000483572	0.00291325	hypothetical protein
CNAG_02489	55.7838	2.47277	5.55107	0.710106	3.48225	0.000497218	0.00298311	alcohol dehydrogenase, propanol-preferring
CNAG_07688	5306.91	-0.679891	0.624213	0.195596	-3.47599	0.000508979	0.00303522	hypothetical protein
CNAG_02550	9690.47	-0.689936	0.619881	0.198778	-3.47089	0.00051873	0.00308614	hypothetical protein
CNAG_00015	497.006	-1.06069	0.479404	0.305872	-3.46774	0.000524852	0.00312013	hypothetical protein
CNAG_03346	863.842	-1.11272	0.462421	0.320989	-3.46655	0.000527193	0.00312676	hypothetical protein
CNAG_03544	8281.32	-0.641724	0.640946	0.185962	-3.45083	0.000558856	0.00330174	hypothetical protein
CNAG_00130	157688	-0.69709	0.616815	0.202131	-3.44871	0.000563274	0.00332271	CAMK/CAMK1/CAMK1-RCK protein kinase
CNAG_02499	16.2752	2.90101	7.46951	0.841776	3.4463	0.000568316	0.00334986	hypothetical protein
CNAG_03197	394.379	0.621404	1.53837	0.180426	3.44409	0.000572995	0.00337485	hypothetical protein
CNAG_00261	100213	-0.892408	0.538714	0.259553	-3.43825	0.000585484	0.00344309	hypothetical protein
CNAG_00911	95.9185	0.966016	1.95344	0.281007	3.43769	0.000586691	0.00344754	phytanoyl-CoA dioxygenase
CNAG_02709	331.095	-1.15251	0.449843	0.335412	-3.4361	0.000590163	0.00346528	small subunit ribosomal protein S19
CNAG_02034	511.269	0.752285	1.68446	0.219029	3.43463	0.000593358	0.00347895	hypothetical protein
CNAG_07873	2812.67	-0.670802	0.628157	0.195306	-3.43461	0.000593401	0.00347895	MIPC synthase
CNAG_02460	15179.2	-0.911455	0.531649	0.265743	-3.42984	0.000603941	0.00353803	coproporphyrinogen III oxidase
CNAG_00890	7865.61	-0.761957	0.589696	0.22253	-3.42406	0.000616928	0.00360858	hypothetical protein
CNAG_07356	14799.9	-0.597518	0.66089	0.174582	-3.42257	0.000620325	0.0036229	succinate dehydrogenase, cytochrome b556 subunit
CNAG_00393	14967.1	0.749034	1.68067	0.218901	3.4218	0.000622086	0.00363042	1,4-alpha-glucan-branching enzyme
CNAG_01075	494.4	0.989088	1.98493	0.289405	3.41765	0.000631632	0.00368051	methylmalonate-semialdehyde dehydrogenase(acylating)
CNAG_07026	296.638	-0.594912	0.662085	0.174379	-3.41161	0.000645798	0.00375447	hypothetical protein
CNAG_01666	714.033	-0.67412	0.626714	0.197823	-3.4077	0.000655135	0.00379585	U6 snRNA-associated Sm-like protein LSm2
CNAG_01611	3786.37	-0.668567	0.629131	0.196419	-3.40377	0.000664624	0.00384346	hypothetical protein
CNAG_04104	3104.81	0.611457	1.5278	0.180207	3.39309	0.000691096	0.00397549	mucin-desulfating sulfatase
CNAG_01237	1109.72	-1.53197	0.345805	0.452289	-3.38715	0.00070622	0.00405639	hypothetical protein
CNAG_07674	988.85	0.73282	1.66188	0.216489	3.38502	0.000711741	0.00408503	hypothetical protein
CNAG_03848	467.587	-0.695504	0.617494	0.205615	-3.38255	0.00071816	0.00411261	glutathione transferase
CNAG_07650	31.5829	-1.32874	0.398117	0.393237	-3.37898	0.000727564	0.00416023	hypothetical protein
CNAG_04283	14900.7	-0.721544	0.606448	0.214166	-3.36909	0.000754177	0.00428994	integral membrane protein
CNAG_00155	28.2162	1.40368	2.64575	0.416763	3.36804	0.000757042	0.00429665	hypothetical protein
CNAG_04842	1812.73	-0.819411	0.566673	0.243464	-3.36564	0.000763668	0.00433104	hypothetical protein
CNAG_03795	432.43	-0.926187	0.526247	0.275344	-3.36374	0.000768938	0.00435447	N-glycosylase/DNA lyase
CNAG_00123	1979.88	-0.585552	0.666394	0.174279	-3.35986	0.000779819	0.00440304	hypothetical protein
CNAG_05654	5184.47	-1.02638	0.49094	0.30568	-3.35771	0.000785924	0.00443424	hypothetical protein
CNAG_03509	5069.06	-0.636595	0.643229	0.189807	-3.35391	0.000796784	0.00448881	pyruvate dehydrogenase X component
CNAG_07537	331.183	0.759646	1.69307	0.226826	3.34902	0.000810983	0.0045421	mitochondrial GTPase 1
CNAG_07725	227.827	0.712939	1.63914	0.212939	3.34808	0.000813721	0.0045541	HMG box factor
CNAG_02200	4414.74	-1.27207	0.414064	0.379987	-3.34768	0.000814911	0.00455742	hypothetical protein
CNAG_06873	801.49	-0.747001	0.595841	0.223273	-3.34568	0.000820806	0.00458192	5-oxoprolinase
CNAG_07894	74.382	2.23804	4.71755	0.670031	3.3402	0.000837181	0.00464968	hypothetical protein
CNAG_02514	370.388	0.684338	1.60696	0.205091	3.33676	0.000847616	0.00469125	hypothetical protein
CNAG_05788	2414.82	-0.702425	0.614539	0.210621	-3.33501	0.000852956	0.00471159	V-type ATPase, G subunit
CNAG_03911	2052.03	-0.821562	0.565829	0.246534	-3.33245	0.000860844	0.00474831	hydrolase
CNAG_07949	130.609	0.851118	1.8039	0.256317	3.32057	0.000898323	0.00493014	hypothetical protein
CNAG_00016	3263.95	-0.731033	0.602472	0.220383	-3.3171	0.000909557	0.00498463	U6 snRNA-associated Sm-like protein LSm5
CNAG_05749	1247.31	0.781738	1.7192	0.235723	3.31634	0.000912034	0.00499463	hypothetical protein
CNAG_06354	1645.52	-0.920674	0.528262	0.278181	-3.30962	0.000934226	0.00510884	hypothetical protein, variant
CNAG_06669	2178.47	0.642513	1.56105	0.1944	3.30511	0.000949386	0.00518085	hypothetical protein
CNAG_05114	516.159	0.695773	1.61975	0.210668	3.30269	0.000957615	0.0052218	peroxisomal copper amine oxidase
CNAG_04927	450.782	0.628777	1.54625	0.190486	3.3009	0.000963738	0.0052477	hypothetical protein
CNAG_00243	673.709	0.718942	1.64597	0.218031	3.29743	0.000975752	0.00530179	hypothetical protein
CNAG_01681	4216.78	0.732666	1.66171	0.222266	3.29635	0.000979497	0.00531836	cytosine permease
CNAG_07459	293.803	-0.702296	0.614594	0.213853	-3.28402	0.00102339	0.00553309	hypothetical protein
CNAG_07912	207.385	-0.858927	0.551363	0.261702	-3.28208	0.00103046	0.00555562	hypothetical protein
CNAG_01542	646.76	-0.632663	0.644985	0.192853	-3.28055	0.00103606	0.00557792	taurine catabolism dioxygenase TauD
CNAG_04869	8332.35	0.688257	1.61134	0.210272	3.27318	0.00106346	0.00568984	carboxylesterase
CNAG_06954	16.2399	2.0788	4.22456	0.635106	3.27315	0.00106354	0.00568984	hypothetical protein
CNAG_01514	15.8558	1.72183	3.29854	0.526615	3.26961	0.00107695	0.00574673	hypothetical protein
CNAG_05432	56.9856	1.17896	2.26413	0.360588	3.26955	0.00107718	0.00574673	hypothetical protein
CNAG_06014	70.4175	0.941569	1.92062	0.288106	3.26814	0.00108258	0.00577149	hypothetical protein
CNAG_06958	20.5354	1.6022	3.03606	0.490531	3.26626	0.0010898	0.00580074	hypothetical protein
CNAG_03797	45.7431	1.09449	2.13538	0.335228	3.26492	0.00109495	0.00581717	hypothetical protein
CNAG_03076	300.039	-0.767032	0.587625	0.23498	-3.26424	0.00109756	0.00582522	hypothetical protein
CNAG_04248	4234.59	-0.634756	0.64405	0.194594	-3.26195	0.00110649	0.00585813	ubiquitin thioesterase OTUB1
CNAG_05587	2725.58	-0.741163	0.598257	0.227368	-3.25975	0.00111511	0.00588745	hypothetical protein
CNAG_04988	1964.29	0.595768	1.51128	0.183412	3.24825	0.00116118	0.00611381	Gly-Xaa carboxypeptidase
CNAG_01376	10579.7	-0.630426	0.645986	0.194249	-3.24545	0.00117267	0.00616155	stress response protein NST1
CNAG_03578	443.415	-1.10794	0.463956	0.341498	-3.24436	0.00117715	0.0061766	hypothetical protein
CNAG_04515	3345.43	-0.658496	0.633538	0.203137	-3.24163	0.00118849	0.00623182	hypothetical protein, variant
CNAG_02288	1033.27	0.624016	1.54116	0.192717	3.23799	0.00120373	0.00630743	solute carrier family 25 (mitochondrial citratetransporter), member 1
CNAG_02062	1323.48	0.63148	1.54915	0.195165	3.23562	0.00121377	0.00635567	glycoside hydrolase family 2
CNAG_05603	609.111	0.657677	1.57754	0.20359	3.2304	0.00123616	0.00646404	hypothetical protein
CNAG_04197	9483.22	-0.605	0.657472	0.187846	-3.22073	0.00127867	0.00666354	CMGC/DYRK/YAK protein kinase
CNAG_00029	470.575	0.695316	1.61924	0.215966	3.21957	0.00128385	0.00668187	D-3-phosphoglycerate dehydrogenase
CNAG_02420	42.6007	1.07006	2.09952	0.333164	3.2118	0.00131906	0.0068507	hypothetical protein
CNAG_01768	11219.8	-0.677272	0.625347	0.211071	-3.20874	0.0013332	0.00691005	hypothetical protein
CNAG_06241	6905.91	-0.782234	0.581466	0.244484	-3.19953	0.00137651	0.00709603	acidic laccase
CNAG_02705	463.029	-0.90597	0.533674	0.284393	-3.18563	0.0014444	0.00741103	hypothetical protein, variant 1
CNAG_04552	211.208	-0.691009	0.61942	0.217419	-3.17823	0.00148175	0.0075874	hypothetical protein, variant
CNAG_04963	30880.4	-0.724111	0.60537	0.228186	-3.17334	0.00150696	0.00769587	hypothetical protein
CNAG_01981	6767.9	-0.600546	0.659504	0.189607	-3.16732	0.0015385	0.00782114	sulfide:quinone oxidoreductase
CNAG_01570	97.5083	0.777055	1.71363	0.246305	3.15485	0.00160581	0.00809788	hypothetical protein
CNAG_07022	39.7927	1.21358	2.31913	0.385121	3.15118	0.00162615	0.00818428	hypothetical protein
CNAG_00634	7216.38	-0.911894	0.531487	0.289882	-3.14575	0.00165664	0.00831038	hypothetical protein
CNAG_00709	1451.15	0.801631	1.74307	0.255003	3.14361	0.00166877	0.00836576	uracil-DNA glycosylase
CNAG_06628	4329.14	0.634125	1.552	0.201938	3.14021	0.00168829	0.00844697	aldehyde dehydrogenase (NAD )
CNAG_04357	156.527	0.749022	1.68065	0.238944	3.13471	0.00172022	0.0085789	hypothetical protein
CNAG_04269	8448.82	-0.6551	0.635031	0.208983	-3.13471	0.00172027	0.0085789	leucyl aminopeptidase
CNAG_05371	1635.66	0.686885	1.6098	0.219195	3.13367	0.00172637	0.00859811	hypothetical protein
CNAG_05033	5181.93	-0.746786	0.59593	0.239508	-3.118	0.0018208	0.00897486	hypothetical protein
CNAG_05472	324.506	0.606721	1.52279	0.194843	3.11391	0.00184629	0.00908878	meiotic recombination protein SPO11, variant 1
CNAG_02665	2671.26	0.800514	1.74172	0.257182	3.11264	0.00185423	0.00912166	hypothetical protein
CNAG_07852	156.488	0.736062	1.66562	0.23664	3.11048	0.00186786	0.00917134	hypothetical protein
CNAG_02044	1023.78	-1.56703	0.337503	0.504573	-3.10565	0.0018986	0.00929839	hypothetical protein
CNAG_03445	3862.51	-0.639027	0.642146	0.206193	-3.09917	0.00194065	0.0094861	hypothetical protein
CNAG_06292	869.611	0.664793	1.58534	0.214605	3.09776	0.0019499	0.00952525	sugar transporter, variant 1
CNAG_02124	1171.59	-0.633152	0.644766	0.204423	-3.09726	0.00195315	0.00953472	hypothetical protein
CNAG_02603	702.837	0.759739	1.69318	0.245384	3.09612	0.00196072	0.00955978	early growth response protein 1
CNAG_00978	8634.86	-0.787618	0.5793	0.25444	-3.09549	0.00196486	0.00956219	NADH dehydrogenase (ubiquinone) 1 alpha subcomplex9
CNAG_02173	2062.77	-0.730331	0.602766	0.236057	-3.09388	0.0019756	0.0095956	transporter particle component
CNAG_02658	5745.84	-1.00234	0.499191	0.324701	-3.08695	0.00202223	0.00978373	hypothetical protein
CNAG_00770	2198.2	0.665332	1.58593	0.217013	3.06586	0.00217044	0.0103448	DNA mismatch repair protein MSH2
CNAG_01950	1680.56	-0.807229	0.571478	0.26395	-3.05827	0.00222619	0.0105644	hypothetical protein, variant
CNAG_03310	907.361	0.620223	1.53711	0.202863	3.05735	0.00223307	0.0105905	nicotinamide N-methyltransferase
CNAG_02311	119.122	0.966651	1.9543	0.317105	3.04836	0.0023009	0.0108717	hypothetical protein
CNAG_04834	261.292	-0.602252	0.658725	0.197682	-3.04658	0.00231464	0.0109299	MFS transporter
CNAG_06635	4731.31	-0.604692	0.657612	0.198616	-3.04453	0.00233043	0.0109909	CCR4-NOT transcription complex subunit 3
CNAG_07496	18.911	1.52106	2.87002	0.499835	3.04312	0.00234138	0.0110289	hypothetical protein
CNAG_06533	8720.3	-0.67994	0.624191	0.223872	-3.03719	0.00238799	0.0112277	ATP-dependent permease
CNAG_07757	5746.55	-0.70643	0.612835	0.23281	-3.03436	0.00241045	0.0113263	hypothetical protein
CNAG_02590	3014.77	0.756313	1.68917	0.249525	3.031	0.00243741	0.0114249	3-hydroxyisobutyrate dehydrogenase
CNAG_04048	6628.41	-0.590588	0.664072	0.194875	-3.0306	0.00244068	0.0114329	53 kda brg1-associated factor b
CNAG_07367	176.557	0.906509	1.8745	0.300167	3.02002	0.0025276	0.0117898	amino acid transporter, variant
CNAG_07869	132.481	0.833448	1.78194	0.276088	3.01878	0.00253796	0.0118309	hypothetical protein
CNAG_03695	1159.91	0.668079	1.58896	0.221631	3.01438	0.00257507	0.0119823	hypothetical protein
CNAG_05250	6381.06	-0.648235	0.63806	0.215976	-3.00142	0.00268724	0.0124258	telomere maintenance protein
CNAG_05903	3290.44	-0.591987	0.663428	0.19755	-2.99664	0.00272972	0.0125867	hypothetical protein
CNAG_06140	5763.14	0.671954	1.59323	0.224274	2.99613	0.00273434	0.0125925	long-chain fatty acid transporter
CNAG_05092	10.5239	2.2603	4.79092	0.754459	2.99593	0.00273614	0.0125925	hypothetical protein
CNAG_08012	8208.41	-0.707743	0.612277	0.236272	-2.99546	0.00274027	0.0125973	V-type proton ATPase proteolipid subunit
CNAG_00080	53.2857	0.923739	1.89703	0.308636	2.99297	0.00276274	0.0126626	hypothetical protein
CNAG_05757	218.661	0.604127	1.52006	0.202103	2.9892	0.00279707	0.0128045	hypothetical protein
CNAG_04245	17805.5	-0.71918	0.607443	0.240755	-2.98718	0.00281561	0.012874	chitinase
CNAG_05290	1308.8	-0.588562	0.665005	0.197239	-2.984	0.00284507	0.0130009	transcription initiation protein SPT3
CNAG_01019	11895.4	0.883477	1.84482	0.297335	2.97132	0.00296524	0.0134696	superoxide dismutase [Cu-Zn]
CNAG_01562	41660.9	-0.847196	0.555864	0.285419	-2.96825	0.00299496	0.0135643	hypothetical protein, variant
CNAG_01154	982.797	-0.638225	0.642503	0.21523	-2.96532	0.00302368	0.0136586	hypothetical protein
CNAG_02553	702.741	0.643652	1.56228	0.217081	2.96503	0.00302651	0.0136586	short-chain dehydrogenase
CNAG_03931	20475	-0.92192	0.527806	0.311469	-2.95991	0.00307726	0.0138468	mitochondrial import receptor subunit TOM40
CNAG_07655	27.5936	1.37403	2.59194	0.465143	2.954	0.00313683	0.0140487	hypothetical protein
CNAG_03276	979.91	-0.6102	0.655106	0.207061	-2.94695	0.00320922	0.0142975	hypothetical protein
CNAG_05327	4479.37	-0.629934	0.646206	0.213845	-2.94574	0.00322179	0.0143246	hypothetical protein
CNAG_01944	36.2242	1.54776	2.92362	0.525439	2.94565	0.00322281	0.0143246	hypothetical protein
CNAG_01742	2397.07	-0.650075	0.637247	0.220858	-2.9434	0.00324629	0.0144122	aquaporin-associated protein
CNAG_03859	3783.4	-0.806796	0.57165	0.274407	-2.94014	0.00328063	0.0145478	transcriptional regulator Medusa
CNAG_03443	14.4402	3.10516	8.6049	1.05704	2.93761	0.00330754	0.0146416	hypothetical protein
CNAG_03199	638.376	-0.731834	0.602138	0.249418	-2.93417	0.00334441	0.0147621	FAD dependent oxidoreductase
CNAG_02146	7.14189	2.8414	7.16716	0.969741	2.93006	0.00338892	0.0149413	hypothetical protein
CNAG_07570	6917.47	-0.606921	0.656596	0.208584	-2.90972	0.00361752	0.0157977	prenylated SNARE protein Ykt6p
CNAG_05997	12807.8	-0.669494	0.628727	0.230225	-2.908	0.00363746	0.0158724	hypothetical protein
CNAG_02588	439.142	0.672794	1.59416	0.231745	2.90317	0.00369408	0.0161103	avenacinase
CNAG_00784	28.3422	-1.20708	0.433143	0.415849	-2.9027	0.00369965	0.0161253	hypothetical protein
CNAG_01629	388.88	-0.654819	0.635155	0.226173	-2.89521	0.00378907	0.0164775	multifunctional methyltransferase subunit TRM112
CNAG_04634	12733.4	-0.69133	0.619283	0.239019	-2.89236	0.0038236	0.0166088	hypothetical protein
CNAG_00070	4538.06	-0.9461	0.519034	0.327193	-2.89157	0.00383323	0.0166412	hypothetical protein
CNAG_07479	2150.25	-0.896375	0.537235	0.311024	-2.88201	0.00395146	0.0170865	hypothetical protein
CNAG_05809	8606.63	-0.640497	0.641492	0.22253	-2.87824	0.00399895	0.0172821	ferrochelatase
CNAG_02147	919.82	0.797302	1.73785	0.277149	2.87679	0.00401737	0.0173519	cytochrome c peroxidase
CNAG_04764	2723.63	-0.85728	0.551992	0.29948	-2.86256	0.00420232	0.0180083	dihydrofolate reductase
CNAG_02253	25.4781	1.7815	3.43783	0.622928	2.85988	0.00423802	0.0181409	hypothetical protein, variant 1
CNAG_00492	100.624	0.825497	1.77215	0.289307	2.85336	0.00432599	0.0184761	hypothetical protein
CNAG_01895	322.942	-0.848482	0.555369	0.298033	-2.84694	0.00441423	0.01879	hypothetical protein
CNAG_06624	3727.89	-0.809107	0.570735	0.28454	-2.84356	0.00446119	0.0189477	hypothetical protein
CNAG_04088	134.167	-0.761746	0.589782	0.268112	-2.84115	0.00449519	0.0190497	hypothetical protein
CNAG_03819	7611.61	0.683733	1.60629	0.240749	2.84003	0.00451099	0.0190955	sterol 24-C-methyltransferase
CNAG_05535	1238.62	-0.657354	0.63404	0.232072	-2.83254	0.00461802	0.0194516	hypothetical protein
CNAG_03223	90594.9	-0.902376	0.535005	0.318616	-2.83218	0.00462319	0.0194627	hypothetical protein
CNAG_02516	1750.72	-0.654521	0.635286	0.231502	-2.82728	0.00469446	0.0196977	hypothetical protein, variant 2
CNAG_02838	2229.07	-0.620178	0.650591	0.219983	-2.81921	0.00481421	0.0201008	small subunit ribosomal protein S17
CNAG_08007	50.9439	1.19412	2.28805	0.423754	2.81795	0.00483312	0.0201578	hypothetical protein
CNAG_03513	1253.2	0.716189	1.64284	0.25436	2.81565	0.00486781	0.0202625	ribosomal RNA-processing protein 7
CNAG_00749	383.952	0.616875	1.53355	0.219093	2.81559	0.00486882	0.0202625	alternative sulfate transporter
CNAG_01737	81125.7	-0.634659	0.644093	0.225452	-2.81505	0.004877	0.0202855	methylsterol monooxygenase
CNAG_04868	958.68	0.661298	1.5815	0.235284	2.81063	0.0049444	0.0205211	cytoplasmic protein, variant
CNAG_03922	599.217	0.586822	1.50194	0.209021	2.80748	0.00499302	0.0207005	hypothetical protein
CNAG_01333	744.347	0.592342	1.50769	0.211623	2.79905	0.0051254	0.0211575	Haspin protein kinase
CNAG_02156	1502.88	-0.591697	0.663562	0.211415	-2.79875	0.00513011	0.0211655	hypothetical protein
CNAG_05926	5383.36	-0.613885	0.653435	0.21988	-2.79191	0.00523972	0.0215364	U2 small nuclear ribonucleoprotein A'
CNAG_02865	1237.11	0.808082	1.75088	0.290703	2.77975	0.00544001	0.0222044	hypothetical protein
CNAG_00901	2016.55	-0.692428	0.618812	0.249546	-2.77475	0.00552435	0.0225006	hypothetical protein
CNAG_05424	65330.7	-0.877346	0.544368	0.316361	-2.77325	0.00554997	0.0225689	hypothetical protein
CNAG_07759	10.4285	2.74274	6.69342	0.989517	2.7718	0.00557472	0.0226575	hypothetical protein
CNAG_01720	2543.91	-0.672439	0.627445	0.242684	-2.77085	0.00559107	0.0227119	ESCRT-I complex subunit TSG101
CNAG_06351	3855.44	-0.862534	0.549986	0.311349	-2.77032	0.00560019	0.0227368	protein transporter SEC61 subunit beta
CNAG_06622	773.78	-0.670901	0.628114	0.242688	-2.76445	0.00570182	0.0230759	hypothetical protein
CNAG_02339	40.7489	1.09134	2.13072	0.394931	2.76338	0.00572069	0.0231401	hypothetical protein
CNAG_01320	4709.69	-0.61908	0.651086	0.224199	-2.7613	0.00575726	0.0232511	large subunit ribosomal protein L17
CNAG_03161	1286.01	-0.832122	0.561703	0.301887	-2.7564	0.0058441	0.0235272	hypothetical protein
CNAG_05295	2291.28	-0.622299	0.649635	0.226081	-2.75255	0.00591339	0.0237311	hypothetical protein
CNAG_03809	9126.09	-0.728545	0.603512	0.264714	-2.7522	0.00591963	0.0237313	hypothetical protein
CNAG_06559	1453.91	-0.827718	0.56342	0.300873	-2.75105	0.00594037	0.0237895	cysteine and glycine-rich protein
CNAG_07648	98.8083	-0.625709	0.648101	0.227838	-2.74628	0.00602745	0.024113	hypothetical protein
CNAG_06518	45.3019	0.873024	1.8315	0.318171	2.74389	0.00607167	0.0242518	hypothetical protein
CNAG_03226	21713.8	-0.622963	0.649336	0.227081	-2.74336	0.00608147	0.0242783	succinate dehydrogenase [ubiquinone] iron-sulfursubunit, mitochondrial
CNAG_05924	270.083	0.608705	1.52489	0.222404	2.73693	0.0062016	0.0246805	hypothetical protein
CNAG_05334	50.798	-1.07024	0.476239	0.392146	-2.7292	0.00634885	0.0251878	hypothetical protein
CNAG_03229	221.68	-1.14732	0.451464	0.42153	-2.72179	0.00649298	0.0256399	specific transcriptional repressor
CNAG_06904	599.067	0.732309	1.6613	0.270362	2.70862	0.00675633	0.0264972	hypothetical protein
CNAG_07850	7.56697	3.79911	13.9203	1.40283	2.70818	0.00676523	0.0265096	hypothetical protein
CNAG_02905	2099.05	-0.60165	0.659	0.222683	-2.70182	0.00689605	0.0269531	hypothetical protein
CNAG_05691	2956.65	-0.647073	0.638574	0.239567	-2.70101	0.00691284	0.0269806	hypothetical protein
CNAG_03275	1696.78	0.668876	1.58983	0.247836	2.69887	0.00695764	0.0270969	glutaryl-CoA dehydrogenase
CNAG_06215	1514.25	0.622652	1.5397	0.230818	2.69758	0.00698451	0.0271877	hypothetical protein
CNAG_00251	325.899	-0.808818	0.570849	0.300069	-2.69544	0.00702953	0.0273351	hypothetical protein
CNAG_07303	15.8168	1.72019	3.29479	0.640119	2.68729	0.0072034	0.0279543	hypothetical protein
CNAG_01986	7287.03	-0.849725	0.55489	0.316445	-2.68522	0.00724812	0.0280851	hypothetical protein
CNAG_00131	575.622	0.705512	1.63072	0.262813	2.68446	0.00726471	0.0281351	alcohol dehydrogenase
CNAG_03871	969.563	-0.832941	0.561384	0.312529	-2.66517	0.007695	0.0296066	phosphotyrosine protein phosphatase
CNAG_03195	772.688	-0.860101	0.550914	0.322808	-2.66443	0.00771179	0.0296562	hypothetical protein
CNAG_05852	4134.25	-0.713842	0.609694	0.269573	-2.64804	0.00809592	0.0307621	heme oxygenase 2
CNAG_06147	3969.65	-0.80798	0.571181	0.305231	-2.64711	0.00811837	0.0308321	hypothetical protein
CNAG_07947	279.421	-0.597145	0.661061	0.226522	-2.63614	0.00838544	0.0316889	hypothetical protein
CNAG_03914	1105.33	-0.769421	0.586653	0.292039	-2.63466	0.00842222	0.0317695	hypothetical protein, variant
CNAG_07847	229.298	0.824989	1.77152	0.313799	2.62903	0.00856284	0.0321685	hypothetical protein
CNAG_05342	2848.04	-0.606467	0.656803	0.230941	-2.62607	0.00863773	0.0323862	hypothetical protein
CNAG_04591	152.133	-0.825214	0.564398	0.315114	-2.61878	0.00882456	0.0330058	hypothetical protein
CNAG_06253	475.559	0.721188	1.64854	0.275992	2.61307	0.00897324	0.0334032	sugar transporter
CNAG_00438	631.554	-0.634295	0.644256	0.242759	-2.61286	0.00897888	0.0334032	hypothetical protein
CNAG_03511	1134.34	1.03614	2.05073	0.396553	2.61286	0.00897888	0.0334032	hypothetical protein
CNAG_07807	25061.5	0.632004	1.54972	0.241919	2.61245	0.00898946	0.0334263	histone H4
CNAG_08003	471.164	-0.612212	0.654193	0.234572	-2.60992	0.00905644	0.0336426	hypothetical protein
CNAG_05509	1185.59	0.606626	1.52269	0.232691	2.607	0.00913388	0.0338645	imidazoleglycerol-phosphate dehydratase
CNAG_01953	395.41	0.692017	1.61554	0.265579	2.60569	0.00916904	0.0339783	hypothetical protein
CNAG_03510	7648.25	0.766345	1.70095	0.295358	2.59463	0.00946926	0.0349385	large subunit ribosomal protein L36e
CNAG_04494	3932.67	-0.646321	0.638908	0.249155	-2.59405	0.00948527	0.0349807	U1 small nuclear ribonucleoprotein C
CNAG_03468	14.3317	1.43697	2.70751	0.556633	2.58153	0.00983634	0.0360238	hypothetical protein
CNAG_06711	2752.52	-0.723046	0.605817	0.280854	-2.57445	0.0100399	0.0366899	signal recognition particle receptor subunit beta
CNAG_04239	630.665	0.811307	1.7548	0.316038	2.56712	0.0102546	0.0372784	hypothetical protein
CNAG_06334	21105	-0.64028	0.641588	0.250276	-2.55829	0.0105187	0.0381117	hypothetical protein
CNAG_04759	529.191	0.674703	1.59627	0.264135	2.55439	0.0106375	0.0383965	hypothetical protein, variant
CNAG_07577	17.3235	1.6375	3.11126	0.641734	2.55168	0.0107206	0.0386598	hypothetical protein
CNAG_02132	1175.88	-0.680673	0.623874	0.267452	-2.54503	0.0109269	0.0393112	hypothetical protein
CNAG_07391	282.869	0.779644	1.71671	0.307023	2.53937	0.0111054	0.0398034	hypothetical protein
CNAG_01504	1693.79	-0.586371	0.666016	0.231653	-2.53125	0.0113656	0.0405651	hypothetical protein
CNAG_04517	5.88246	-2.38689	0.191194	0.947654	-2.51874	0.0117775	0.0416848	hypothetical protein
CNAG_01009	1434.3	-0.695908	0.61732	0.276546	-2.51643	0.011855	0.0418619	hypothetical protein
CNAG_04711	43.6434	1.00096	2.00133	0.399057	2.50831	0.012131	0.0426986	hypothetical protein
CNAG_00836	1187.18	0.601253	1.51703	0.239977	2.50546	0.0122292	0.042965	2-hydroxyacid dehydrogenase
CNAG_01756	496.013	0.813763	1.75779	0.325295	2.50162	0.0123628	0.0433349	mitochondrial import inner membrane translocasesubunit TIM22
CNAG_06393	1144.85	-0.657421	0.634011	0.26386	-2.49155	0.0127188	0.0443997	transcription initiation factor TFIIH subunit 4
CNAG_03422	2922.89	-0.807103	0.571528	0.324331	-2.48851	0.0128279	0.0446588	calcineurin temperature suppressor Cts1
CNAG_06373	67.8872	0.687831	1.61086	0.276811	2.48484	0.0129611	0.0449896	mitotic spindle assembly checkpoint protein MAD2B
CNAG_02017	96.0823	-0.676316	0.625761	0.273157	-2.47593	0.0132891	0.0459499	hypothetical protein
CNAG_03744	54.2888	1.31392	2.48615	0.530961	2.4746	0.0133386	0.0461	hypothetical protein
CNAG_03989	1557.74	0.637086	1.55518	0.257946	2.46984	0.0135173	0.0465706	hypothetical protein
CNAG_06568	2314.02	-0.882231	0.542528	0.357262	-2.46942	0.0135331	0.0466039	RAN protein kinase
CNAG_05832	10.9255	1.61404	3.06108	0.655246	2.46326	0.013768	0.0472851	hypothetical protein
CNAG_07690	2336.89	-0.72467	0.605136	0.294211	-2.46309	0.0137744	0.0472856	hypothetical protein
CNAG_00818	913.329	-0.626349	0.647814	0.254462	-2.46147	0.0138371	0.0474582	hypothetical protein
CNAG_03639	705.116	-0.595831	0.661663	0.242116	-2.46093	0.0138578	0.0475079	hypothetical protein
CNAG_01893	19288.2	-0.692802	0.618651	0.282225	-2.45479	0.0140968	0.0481331	glutathione S-transferase Gst3
CNAG_06935	6429.74	0.698168	1.62244	0.28486	2.45092	0.0142491	0.0485324	isochorismatase hydrolase
CNAG_06455	1869.38	-0.73967	0.598877	0.303406	-2.43789	0.0147734	0.0498793	hypothetical protein
