# Supplementary material for: Interplay between acetylation and ubiquitination of imitation switch chromatin remodeler Isw1 confers multidrug resistance in Cryptococcus neoformans
Source: eLife. 2024 Jan 22;13:e85728. doi: 10.7554/eLife.85728 (PMC10834027; doi:10.7554/eLife.85728)
Supplement: Supplementary file 3. [file elife-85728-supp3.xlsx]

## Sheet: Sheet1
Supplementary table 3. Primers used in this study.
Lab ID	Target	Sequence (5' to 3')
1	CnACT1	GCACCATACCTTCTACAATGAGC
2	CnACT1	CAGGAAGCTCGTAAGACTTTTCA
23	M13F	GTAAAACGACGGCCAGTGAA
24	M13R	CAGGAAACAGCTATGACCAT
412	NAT Check	TCACTTTGCGAGAAGTCCCT
413	NAT Check	AGCCGGAGTAAGAGACGACA
414	HYG Check	ATTTCGGCTCCAACAATGTC
415	HYG Check	GATGTTGGCGACCTCGTATT
416	NEO Check	TGAATGAACTGCAGGACGAG
417	NEO Check	ATACTTTCTCGGCAGGAGCA
3534	ISW1 Deletion	ACGGGGAGGATGAAGACTCAGTG
3535	ISW1Deletion	TGAGTCGTATTACAATTCACTGGCCGTCGTTTTACTATTGTGGGATTGGAAGTAGATGGTGGAAAAG
3536	ISW1 Deletion	CTTGGCGTAATCATGGTCATAGCTGTTTCCTGGATAGTAGTGGGCGCGTAATAACATTCGG
3537	ISW1 Deletion	CTCCGGCGTTGGGCCTAT
3557	ISW1 RT	ACTCAAGACTGGAGGGCCCA
3558	ISW1 RT	GGCGGTTTTACCACTTACCCTTAAGC
4421-MY	ISW1 RT	GTCCATGATCCTCTCCCAATCCTTAAGC
3733	ISW1 WT	NNNNAAGCTTACGGGGAGGATGAAGACTCAGTG
3734	ISW1 WT	NNNNGAATTCCACCTTCTTCCTCTTGGTACCTTTTGACC
3735	ISW1 WT	NNNNCCGCGGGATAGTAGTGGGCGCGTAATAACATTCGG
3736	ISW1 WT	NNNNGAGCTCCTCCGGCGTTGGGCCTAT
3898-MY	ISW1 WT	GGTGCGCGCAGGTGAGATAA
3899-MY	ISW1 WT	GCGAGGCCAACGATAGACTGAGAG
3891	ISW1 K89R	CAATAGAAAATCACACCTTCTGCCGCCAGGCGTGCTGCCCAGGCCA
3892	ISW1 K89Q	CAATAGAAAATCACACCTTCTGCCGCCCAGCGTGCTGCCCAGGCCA
3866-MY	ISW1 K89	GGCGGCAGAAGGTGTGATTTTCTATTG
3862-MY	ISW1 K97R	GCTGCCCAGGCCAGTGCGAGGAAGGCGCAAACGGCA
3863-MY	ISW1 K97Q	GCTGCCCAGGCCAGTGCGCAGAAGGCGCAAACGGCAG
3787	ISW1 K97	CGCACTGGCCTGGGCAGC
3864-MY	ISW1 K113R	GCTCAGCATGCGGAAATCGGTAGGAAGCGAAGTGCCATTGAGCA
3865-MY	ISW1 K113Q	GCTCAGCATGCGGAAATCGGTCAGAAGCGAAGTGCCATTGAGCA
3836	ISW1 K113	ACCGATTTCCGCATGCTGAGC
4444-MY	ISW1 K147	AGGGTTTGTCTTGCTCATGTATTCTCGATTAACG
4445-MY	ISW1 K147	GAGATCGATAAAGTGCTGGAAAAGCTCGG
4446-MY	ISW1 K183	AGGGAAGAAGACGAAGAGCTTTTGAAGGAT
4447-MY	ISW1 K183	TTCAGATTTGCGATGTCGGTTATCGCTAA
4448-MY	ISW1 K297	AGGGAAGAACGAGGCGAACTCATCTCG
4449-MY	ISW1 K297	GGTGCCTTGGAGCACAACAAC
4450-MY	ISW1 K347	AGGAATGTCGACTCCCTTCTTTCGCAGATTATTAG
4451-MY	ISW1 K347	GATACGATGAGCTTCATCAATGATAATATATTCCCAGC
3807-MY	ISW1 K415	AGGCAACTCCACAAAGTCCTCCGA
3809-MY	ISW1 K415	GACAACGGCATCGGGATCGG
4452-MY	ISW1 K441	AGGGAGATTAACCTTTACGTCGGTATGACTGA
4453-MY	ISW1 K441	CTTTGGCAAGAGAGAGTGCTCGAC
ZR12	CDC4 Deletion	ACCATCTACGACGATTTTCGATGCTT
ZR13	CDC4 Deletion	TGAGTCGTATTACAATTCACTGGCCGTCGTTTTACCGCGTATGAATCTAGGCAAGCC
ZR14	CDC4 Deletion	CTTGGCGTAATCATGGTCATAGCTGTTTCCTGCGATATCACGAGGTTTCAAGCAATCTTCT
ZR15	CDC4 Deletion	AAAAGGGATAGTGTGGCACTTACACG
ZR16	FWD1 Deletion	CTCTGGACTGGGCTCGATTAACTT
ZR17	FWD1 Deletion	TGAGTCGTATTACAATTCACTGGCCGTCGTTTTACGATCGATAGTACAATCGGCTTTTCGG
ZR18	FWD1 Deletion	CTTGGCGTAATCATGGTCATAGCTGTTTCCTGGGAGACTCAGAAATATTGTGTTGTACTGTGT
ZR19	FWD1 Deletion	GTAAGTGGAAAGTGTCCTTCCTCTTTC
ZR24	CDC4 RT	AACGGTGCAACCGTTTTTGA
ZR70	CDC4 RT	TGAGTTTCCTTTAAAGTCAT
ZR26	FWD1 RT	GGAGGTTCGTACGAGCTTCC
ZR68	FWD1 RT	GCAGCGAATTTAAAACTGTG
ZR48	CDC4 WT	NNNNATCGATGGACAGCACCGTCAAGGTTTG
ZR33	CDC4 WT	NNNNCCCGGGATATGAATGCTCATCAGCATCCTCCA
ZR34	CDC4 WT	NNNNACTAGTCGATATCACGAGGTTTCAAGCAATCTTCT
ZR51	CDC4 WT	NNNNGAGCTCAAAAGGGATAGTGTGGCACTTACAC
4376-MY	CNAG_02430	ATTGCCGTCTTCGATGAACT
4377-MY	CNAG_02430	TGAGAAGCCAAGGTGTTTGA
4378-MY	CNAG_06338	AGTTCATGGTTACGAAGAGC
4379-MY	CNAG_06338	AACCATTGACACCATTGAGG
4384-MY	CNAG_03600	TATCAGCTATGCGAATCCAC
4385-MY	CNAG_03600	GATCAAACTGGCGTTTTCTC
4699-MY	FCY1	CCGACATGGAGAGATGGACT
4700-MY	FCY1	CACAATCGAGGTTGATCACG
4701-MY	FUR1	ATGCTAAGTTGCCCGATGAC
4702-MY	FUR1	GCGAGTGCAAACTTTGTTGA
4703-MY	UGD1	TCTGGCTCGACATGACTGAC
4704-MY	UGD1	CGGGGACAGTTGTCGTAGAT
4705-MY	UXS1	GGTGACGAGTTCACCATCCT
4706-MY	UXS1	TGCCACTGGAGAGACTCCTT
YR_RT_7	FCY2	GCTCATTTGCTACCTCTCTCGA
YR_RT_8	FCY2	AGAGCCAACCAATATCGCCA
4466-MY	safe heaven up	nnnnGGGCCCGAACGAAACGGTGTGAAGGGC
4467-MY	safe heaven up	CACCAAAAATTCAACGGGTGGAGATCCCATACAGCGCGCGAACCTCTC
4468-MY	TEFp	GGATCTCCACCCGTTGAATTTTTGGTG
2516	TEFp	GGATCTCCACCCGTTGAATTTTTGGTG
4470-MY	safe heaven down	nnnnCCGCGGTTTCGCAATTGTCATTCACGTAGTGGTG
4471-MY	safe heaven down	nnnnGAGCTCTAACCCTCAGCTAGACGCTCAGC
4330-MY	UHRF1 Deletion	TACGACCCCAGGGCAATAGCA
4331-MY	UHRF1 Deletion	TGAGTCGTATTACAATTCACTGGCCGTCGTTTTACCGACTGAAATTATAGCCTTGTCTGCTCCAG
4332-MY	UHRF1 Deletion	CTTGGCGTAATCATGGTCATAGCTGTTTCCTGAGCCTGACTGTCGGAGTATAGTAGTAATTATTTTGAAG
4333-MY	UHRF1 Deletion	TCGCTTCTTGCTTCAGGAGGAGT
4334-MY	NRDP1 Deletion	TGGCTTGTACCACTCGAAATTCGGT
4335-MY	NRDP1 Deletion	TGAGTCGTATTACAATTCACTGGCCGTCGTTTTACGGTCCTGCTATTGCGTGAAGACTC
4336-MY	NRDP1 Deletion	CTTGGCGTAATCATGGTCATAGCTGTTTCCTGAGACGCCAGTTGGATGATACTCAAAAGAG
4337-MY	NRDP1 Deletion	CCAGAGCTACTACAGGCCTTCACAAG
4338-MY	BRE1 Deletion	CAAGGCAACCAGAGTCCTGTCC
4339-MY	BRE1 Deletion	TGAGTCGTATTACAATTCACTGGCCGTCGTTTTACAGGTCTGCGTTCATTTTGACGGG
4340-MY	BRE1 Deletion	CTTGGCGTAATCATGGTCATAGCTGTTTCCTGTCTGGCTACGCCCGTTTCAGA
4341-MY	BRE1 Deletion	GTTATTCCCGGTGCGGGTGC
4342-MY	NEDD4 Deletion	TCTGCGAAGAACGGCCGTAGA
4343-MY	NEDD4 Deletion	TGAGTCGTATTACAATTCACTGGCCGTCGTTTTACGGTGTAGAGTTTGGGGGAAGTTTGG
4344-MY	NEDD4 Deletion	CTTGGCGTAATCATGGTCATAGCTGTTTCCTGTCGGCCAAGAATAAGCCCATCAC
4345-MY	NEDD4 Deletion	GACCAACAGCGAGATAGAGAGGTCG
4346-MY	PIAS1 Deletion	AGGGGAATACGTACCAATTGTCCAGG
4347-MY	PIAS1 Deletion	TGAGTCGTATTACAATTCACTGGCCGTCGTTTTACTGTCTTCCGTTCAAAATCGTCGCG
4348-MY	PIAS1 Deletion	CTTGGCGTAATCATGGTCATAGCTGTTTCCTGGATAATAGAGGACGCGAGAGAGAGAGCT
4349-MY	PIAS1 Deletion	TTCACGCTGCTCAACACACCC
4350-MY	HUWE1 Deletion	CAAACATCGGAGGTGGTTTTCTTGATGG
4351-MY	HUWE1 Deletion	TGAGTCGTATTACAATTCACTGGCCGTCGTTTTACTGCTATGGTAGGTCTTGAGCATCCG
4352-MY	HUWE1 Deletion	CTTGGCGTAATCATGGTCATAGCTGTTTCCTGTGGAGGCTTTGGGAAAGCTTGATG
4353-MY	HUWE1 Deletion	AAATTGCTGCCAGGCGTGC
4354-MY	UBE7 Deletion	ACATACCGCGAAGAAGACGCACA
4355-MY	UBE7 Deletion	TGAGTCGTATTACAATTCACTGGCCGTCGTTTTACCTGGCGGAGGGTGGATGAATAAC
4356-MY	UBE7 Deletion	CTTGGCGTAATCATGGTCATAGCTGTTTCCTGTTACTGTTTGTACCAGTACTGCTTTGGCA
4357-MY	UBE7 Deletion	CGGGCAGTTCGGATTGAGAAGG
4572-MY	ITC1 Deletion	CCCGCTTTCCAACCTGACGT
4573-MY	ITC1 Deletion	TGAGTCGTATTACAATTCACTGGCCGTCGTTTTACCCTGTTTCACTAGGTTTGAATGTCGGTAC
4574-MY	ITC1 Deletion	CTTGGCGTAATCATGGTCATAGCTGTTTCCTGGTGGGAAGGAGTAATGCCTGACTC
4575-MY	ITC1 Deletion	CAGAGATCTGAGACGCAGAACCG
4839-MY	CHD1 Deletion	GATGCATGCATCCAGGCTAGGAAGTATA
4840-MY	CHD1 Deletion	TGAGTCGTATTACAATTCACTGGCCGTCGTTTTACGGTTGTTTTTGCTACAGAATACGAGTGAGC
4841-MY	CHD1 Deletion	CTTGGCGTAATCATGGTCATAGCTGTTTCCTGACTGTCGAGGACTCGACGGAC
4842-MY	CHD1 Deletion	AGAGCTCGAATCCGCTTTCGACT
4631-MY	ITC1 WT	NNNNGGGCCCCGTCATCTCCATCCGCTGACC
4632-MY	ITC1 WT	NNNNCCCGGGCTCCTTCCCACCCGCACG
4633-MY	ITC1 WT	NNNNTCTAGAAAGATGGTCTTTGATAAAAGAGTACTTAGAGTG
4634-MY	ITC1 WT	NNNNGAGCTCCAGAGATCTGAGACGCAGAACCGT
4843-MY	SUA7 WT	NNNNGGGCCCACCGGTATCGCTCGAGATCTCAAC
4844-MY	SUA7 WT	NNNNAAGCTTAGCGTAATCTGGAACATCGTATGGGTAAGGCTGTGCCGTGAGACTG
4845-MY	SUA7 WT	NNNNCCGCGG AACTTGTATCACTGAATTGCTCTCGGGT
4846-MY	SUA7 WT	NNNNGAGCTCGGTGTATGAAGGGGTTGGTCGGTTA
4847-MY	CHD1 WT	NNNNGGGCCCATGGCACGGTATACGTGCTGATTG
4848-MY	CHD1 WT	NNNNGTCGACAGCGTAATCTGGAACATCGTATGGGTACAATTGCTCCCCAGACGAGCC
4849-MY	CHD1 WT	NNNNACTAGTACTGTCGAGGACTCGACGGAC
4850-MY	CHD1 WT	NNNNCCGCGGAGAGCTCGAATCCGCTTTCGACT
4851-MY	DBD MUT	CGAGAGCCCGAATTTGCACAAATG
4852-MY	DBD MUT	CATTATTGTGGGATTGGAAGTAGATGGTGGAAAAG
4853-MY	SNF MUT	TTCACCACTGATCAGCATCTTGTTGACAAT
4854-MY	SNF MUT	ATCTCGCATTTTGCCGCCCT
4855-MY	Helicase-C MUT	AGAGGATGAGGTCAGGGAGTATGC
4856-MY	Helicase-C MUT	ATTGTCAACAAGATGCTGATCAGTGGTGAA
4609-MY	CNAG_06338 ChIP	ACAAATATGGTCTGCGGCGA
4610-MY	CNAG_06338 ChIP	ACTTACGATACGGGCTTGGC
4741-MY	CNAG_03600 ChIP	AGGTGGCCTTTACGAATCTTT
4742-MY	CNAG_03600 ChIP	GTGTCCGACCCTCAGCAC
4755-MY	FCY1 ChIP	GTGGGGACTGCATCGTAGG
4756-MY	FCY1 ChIP	GATGCCTCCACCTCCACC
4745-MY	UGD1 ChIP	CCATGACTAAAGTTGTGCCATTC
4746-MY	UGD1 ChIP	GACCGACCTCCTGACAGTTG
4718-MY	UXS1 ChIP	TCCTCATCCTCCTCTTCAGG
4719-MY	UXS1 ChIP	TCTATAACGCGGACGTAGGG
4761-MY	FCY2 ChIP	GGGGCGCAGTGATACAATAG
4762-MY	FCY2 ChIP	TGAGGTCTGAAGTGGCGAAA
4861-MY	INO1 ChIP	TCTTCCAATCCCTCCCAACT
4862-MY	INO1 ChIP	CAGTGGTGTGTTTGAAGCCC
4881-MY	INO80 ChIP	AATCTGAGCTGAGGAAGGGC
4882-MY	INO80 ChIP	ACTCAGCTCGACACAACAGA
4824-MY	UB	CATGCTAACGATCTCCACAGAAAACTTCAAAATGCAGATCTTCGTGAAAACCCTTACC
4826-MY	UB	NNNNCCCGGGTTAATGGTGATGGTGATGATGACCACCTCTCAGACGCAGGA
	CAP59	CTCTACGTCGAGCAAGTCAAG
	CAP59	TCCGCTGCACAAGTGATACCC
	GPD1	CCACCGAACCCTTCTAGGATA
	GPD1	CTTCTTGGCACCTCCCTTGAG
	LAC1	AACATGTTCCCTGGGCCTGTG
	LAC1	ATGAGAATTGAATCGCCTTGT
	PLB1	CTTCAGGCGGAGAGAGGTTT
	PLB1	GATTTGGCGTTGGTTTCAGT
	SOD1	AAGCCTCTCATCCATATCTT
	SOD1	TTCAACCACGAATATGTA
	URA5	ATGTCCTCCCAAGCCCTCGAC
	URA5	TTAAGACCTCTGAACACCGTACTC
	IGS1	ATCCTTTGCAGACGACTTGA
	IGS1	GTGATCAGTGCATTGCATGA
