# Supplementary material for: Interplay between acetylation and ubiquitination of imitation switch chromatin remodeler Isw1 confers multidrug resistance in Cryptococcus neoformans
Source: eLife. 2024 Jan 22;13:e85728. doi: 10.7554/eLife.85728 (PMC10834027; doi:10.7554/eLife.85728)
Supplement: Supplementary file 5. [file elife-85728-supp5.xlsx]

## Sheet: ERG11
supplementary table 5 Comparison of ERG11 genes in clinical isolates

## Sheet: FCY1
supplementary table 5 Comparison of FCY1 genes in clinical isolates

## Sheet: FCY2
supplementary table 5 Comparison of FCY2 genes in clinical isolates

## Sheet: UXS1
supplementary table 5 Comparison of UXS1 genes in clinical isolates

## Sheet: UGD1
supplementary table 5 Comparison of UGD1 genes in clinical isolates
